# Supplementary material for: Modeling fibrotic alveolar transitional cells with pluripotent stem cell-derived alveolar organoids
Source: Life Sci Alliance. 2023 May 25;6(8):e202201853. doi: 10.26508/lsa.202201853 (PMC10213712; doi:10.26508/lsa.202201853)
Supplement: Supplementary file 2 [file LSA-2022-01853_SdataF2.2.xlsx]

## Sheet: SdataF2.2
Category	Term	Count	%	PValue	Genes	List Total	Pop Hits	Pop Total	Fold Enrichment	Bonferroni	Benjamini	FDR
GOTERM_BP_DIRECT	GO:0030198~extracellular matrix organization	75	2.86369	2.22893e-18	ENSG00000105993, ENSG00000108821, ENSG00000130635, ENSG00000134871, ENSG00000120708, ENSG00000197930, ENSG00000139329, ENSG00000164171, ENSG00000116962, ENSG00000058085, ENSG00000077150, ENSG00000187498, ENSG00000049089, ENSG00000130508, ENSG00000106366, ENSG00000140564, ENSG00000105664, ENSG00000091136, ENSG00000197565, ENSG00000138448, ENSG00000169031, ENSG00000084636, ENSG00000138685, ENSG0000…	2217	196	16792	2.89829	1.24575e-14	1.24575e-14	1.22636e-14
GOTERM_BP_DIRECT	GO:0007155~cell adhesion	129	4.92554	1.44134e-17	ENSG00000134755, ENSG00000164171, ENSG00000164176, ENSG00000079385, ENSG00000101311, ENSG00000145012, ENSG00000130202, ENSG00000106714, ENSG00000091136, ENSG00000113248, ENSG00000138448, ENSG00000134762, ENSG00000046604, ENSG00000010278, ENSG00000038427, ENSG00000113361, ENSG00000091409, ENSG00000253953, ENSG00000082781, ENSG00000062038, ENSG00000183087, ENSG00000151914, ENSG00000108691, ENSG0000…	2217	459	16792	2.1287	8.05567e-14	4.02783e-14	3.96513e-14
GOTERM_BP_DIRECT	GO:0030335~positive regulation of cell migration	68	2.59641	9.52938e-16	ENSG00000153993, ENSG00000179820, ENSG00000108821, ENSG00000113578, ENSG00000174775, ENSG00000112245, ENSG00000065534, ENSG00000058085, ENSG00000170379, ENSG00000119401, ENSG00000143434, ENSG00000164850, ENSG00000185033, ENSG00000125845, ENSG00000008294, ENSG00000164251, ENSG00000153071, ENSG00000148400, ENSG00000107175, ENSG00000180921, ENSG00000140443, ENSG00000106799, ENSG00000130402, ENSG0000…	2217	184	16792	2.79916	5.58453e-12	1.77532e-12	1.74769e-12
GOTERM_BP_DIRECT	GO:0098609~cell-cell adhesion	81	3.09278	9.98036e-13	ENSG00000133789, ENSG00000042493, ENSG00000105355, ENSG00000197694, ENSG00000182718, ENSG00000180370, ENSG00000214517, ENSG00000108829, ENSG00000115310, ENSG00000247596, ENSG00000135048, ENSG00000138594, ENSG00000079385, ENSG00000084733, ENSG00000125966, ENSG00000278828, ENSG00000104067, ENSG00000150471, ENSG00000050405, ENSG00000128641, ENSG00000106636, ENSG00000196396, ENSG00000175793, ENSG0000…	2217	271	16792	2.26388	5.57833e-09	1.39451e-09	1.3728e-09
GOTERM_BP_DIRECT	GO:0043123~positive regulation of I-kappaB kinase/NF-kappaB signaling	54	2.06186	8.23135e-11	ENSG00000174130, ENSG00000152661, ENSG00000111711, ENSG00000263528, ENSG00000003402, ENSG00000119401, ENSG00000003400, ENSG00000141574, ENSG00000082512, ENSG00000131080, ENSG00000164251, ENSG00000164054, ENSG00000142867, ENSG00000127666, ENSG00000155366, ENSG00000100292, ENSG00000197329, ENSG00000110330, ENSG00000080561, ENSG00000189067, ENSG00000137275, ENSG00000124602, ENSG00000121858, ENSG0000…	2217	161	16792	2.54041	4.6005e-07	9.201e-08	9.05778e-08
GOTERM_BP_DIRECT	GO:0006954~inflammatory response	96	3.66552	2.29654e-10	ENSG00000174130, ENSG00000196083, ENSG00000110944, ENSG00000073756, ENSG00000049249, ENSG00000095585, ENSG00000135046, ENSG00000171860, ENSG00000134198, ENSG00000077150, ENSG00000134070, ENSG00000196639, ENSG00000164850, ENSG00000144648, ENSG00000125845, ENSG00000164251, ENSG00000102962, ENSG00000124875, ENSG00000086991, ENSG00000164136, ENSG00000141655, ENSG00000054967, ENSG00000163565, ENSG0000…	2217	379	16792	1.91853	1.28354e-06	2.13923e-07	2.10593e-07
GOTERM_BP_DIRECT	GO:0008285~negative regulation of cell proliferation	98	3.74189	5.66744e-10	ENSG00000174775, ENSG00000152104, ENSG00000164850, ENSG00000141052, ENSG00000148400, ENSG00000086991, ENSG00000185436, ENSG00000153266, ENSG00000136826, ENSG00000175592, ENSG00000127152, ENSG00000104419, ENSG00000138685, ENSG00000010278, ENSG00000254087, ENSG00000086062, ENSG00000101144, ENSG00000165959, ENSG00000136235, ENSG00000136634, ENSG00000057294, ENSG00000136754, ENSG00000135269, ENSG0000…	2217	396	16792	1.87442	3.16753e-06	4.52504e-07	4.45461e-07
GOTERM_BP_DIRECT	GO:0007156~homophilic cell adhesion via plasma membrane adhesion molecules	51	1.94731	1.31332e-09	ENSG00000134757, ENSG00000240764, ENSG00000134755, ENSG00000197410, ENSG00000253767, ENSG00000079385, ENSG00000204956, ENSG00000187372, ENSG00000177839, ENSG00000253846, ENSG00000148600, ENSG00000130202, ENSG00000156453, ENSG00000113209, ENSG00000113248, ENSG00000134762, ENSG00000046604, ENSG00000113361, ENSG00000253953, ENSG00000139211, ENSG00000120324, ENSG00000062038, ENSG00000120327, ENSG0000…	2217	158	16792	2.44484	7.3401e-06	9.17516e-07	9.03234e-07
GOTERM_BP_DIRECT	GO:0060337~type I interferon signaling pathway	29	1.10729	1.8056e-09	ENSG00000185507, ENSG00000187608, ENSG00000115415, ENSG00000111335, ENSG00000213928, ENSG00000204592, ENSG00000117595, ENSG00000142166, ENSG00000089127, ENSG00000234745, ENSG00000159110, ENSG00000125347, ENSG00000162434, ENSG00000172183, ENSG00000068079, ENSG00000130303, ENSG00000165949, ENSG00000204264, ENSG00000157601, ENSG00000204525, ENSG00000126709, ENSG00000204642, ENSG00000128604, ENSG0000…	2217	64	16792	3.43206	1.00915e-05	1.12128e-06	1.10382e-06
GOTERM_BP_DIRECT	GO:0043065~positive regulation of apoptotic process	77	2.94005	8.84405e-09	ENSG00000073756, ENSG00000130758, ENSG00000099860, ENSG00000006432, ENSG00000118432, ENSG00000166311, ENSG00000146426, ENSG00000164850, ENSG00000125845, ENSG00000030110, ENSG00000183770, ENSG00000160293, ENSG00000148400, ENSG00000086991, ENSG00000015475, ENSG00000104332, ENSG00000175592, ENSG00000100292, ENSG00000156299, ENSG00000116717, ENSG00000205155, ENSG00000176720, ENSG00000171552, ENSG0000…	2217	300	16792	1.94404	4.94282e-05	4.94294e-06	4.866e-06
GOTERM_BP_DIRECT	GO:0007165~signal transduction	220	8.40015	1.0674e-08	ENSG00000174130, ENSG00000181467, ENSG00000175344, ENSG00000173166, ENSG00000077238, ENSG00000180370, ENSG00000110025, ENSG00000141574, ENSG00000134470, ENSG00000132170, ENSG00000134909, ENSG00000106683, ENSG00000155962, ENSG00000130202, ENSG00000106799, ENSG00000127152, ENSG00000134363, ENSG00000240891, ENSG00000171557, ENSG00000189067, ENSG00000143622, ENSG00000164342, ENSG00000116473, ENSG0000…	2217	1161	16792	1.43525	5.96549e-05	5.42334e-06	5.33892e-06
GOTERM_BP_DIRECT	GO:0042981~regulation of apoptotic process	60	2.29095	1.30684e-08	ENSG00000131323, ENSG00000049249, ENSG00000134954, ENSG00000130513, ENSG00000003402, ENSG00000115310, ENSG00000003400, ENSG00000082512, ENSG00000163083, ENSG00000118515, ENSG00000142867, ENSG00000015475, ENSG00000141655, ENSG00000054967, ENSG00000100065, ENSG00000164733, ENSG00000130402, ENSG00000072110, ENSG00000100290, ENSG00000164938, ENSG00000115107, ENSG00000104419, ENSG00000173530, ENSG0000…	2217	213	16792	2.13358	7.30365e-05	6.0866e-06	5.99186e-06
GOTERM_BP_DIRECT	GO:0022617~extracellular matrix disassembly	30	1.14548	3.95681e-08	ENSG00000042493, ENSG00000095587, ENSG00000039068, ENSG00000137745, ENSG00000115414, ENSG00000137845, ENSG00000038295, ENSG00000162909, ENSG00000116962, ENSG00000148180, ENSG00000058085, ENSG00000275896, ENSG00000174705, ENSG00000035862, ENSG00000166670, ENSG00000087245, ENSG00000102265, ENSG00000140564, ENSG00000138829, ENSG00000099953, ENSG00000136167, ENSG00000154736, ENSG00000137673, ENSG0000…	2217	76	16792	2.98982	0.000221122	1.70113e-05	1.67465e-05
GOTERM_BP_DIRECT	GO:0030036~actin cytoskeleton organization	42	1.60367	4.35976e-08	ENSG00000105993, ENSG00000113916, ENSG00000162704, ENSG00000137825, ENSG00000163739, ENSG00000196588, ENSG00000132376, ENSG00000170873, ENSG00000066427, ENSG00000196923, ENSG00000110880, ENSG00000138594, ENSG00000034510, ENSG00000084112, ENSG00000158186, ENSG00000149798, ENSG00000106683, ENSG00000070831, ENSG00000163545, ENSG00000158856, ENSG00000131236, ENSG00000128487, ENSG00000177731, ENSG0000…	2217	130	16792	2.44705	0.000243637	1.74048e-05	1.71339e-05
GOTERM_BP_DIRECT	GO:0007411~axon guidance	46	1.7564	3.43655e-07	ENSG00000176697, ENSG00000105711, ENSG00000197694, ENSG00000143590, ENSG00000162849, ENSG00000074047, ENSG00000144619, ENSG00000159674, ENSG00000174775, ENSG00000110400, ENSG00000135622, ENSG00000185070, ENSG00000118257, ENSG00000143434, ENSG00000162490, ENSG00000154380, ENSG00000165606, ENSG00000125266, ENSG00000149557, ENSG00000153266, ENSG00000072832, ENSG00000133216, ENSG00000099617, ENSG0000…	2217	159	16792	2.19128	0.00191884	0.000128046	0.000126053
GOTERM_BP_DIRECT	GO:0001525~angiogenesis	58	2.21459	4.5191e-07	ENSG00000107731, ENSG00000107338, ENSG00000073756, ENSG00000182718, ENSG00000113578, ENSG00000134871, ENSG00000120708, ENSG00000187091, ENSG00000005108, ENSG00000154764, ENSG00000079385, ENSG00000160293, ENSG00000100345, ENSG00000087245, ENSG00000169429, ENSG00000106366, ENSG00000128165, ENSG00000100292, ENSG00000111145, ENSG00000138448, ENSG00000078098, ENSG00000157227, ENSG00000158195, ENSG0000…	2217	223	16792	1.96997	0.00252254	0.000157858	0.000155401
GOTERM_BP_DIRECT	GO:0043410~positive regulation of MAPK cascade	29	1.10729	7.39428e-07	ENSG00000105971, ENSG00000170075, ENSG00000215788, ENSG00000128052, ENSG00000174775, ENSG00000026103, ENSG00000173545, ENSG00000170214, ENSG00000170775, ENSG00000164850, ENSG00000035862, ENSG00000125845, ENSG00000168036, ENSG00000054967, ENSG00000141753, ENSG00000136848, ENSG00000095752, ENSG00000128342, ENSG00000197461, ENSG00000148053, ENSG00000169252, ENSG00000197746, ENSG00000141068, ENSG0000…	2217	81	16792	2.71175	0.00412414	0.000243098	0.000239314
GOTERM_BP_DIRECT	GO:0048013~ephrin receptor signaling pathway	30	1.14548	8.52073e-07	ENSG00000162704, ENSG00000143590, ENSG00000174775, ENSG00000197555, ENSG00000137845, ENSG00000241553, ENSG00000160293, ENSG00000130429, ENSG00000115091, ENSG00000087245, ENSG00000125266, ENSG00000070831, ENSG00000184009, ENSG00000106123, ENSG00000161203, ENSG00000183317, ENSG00000133216, ENSG00000099617, ENSG00000075624, ENSG00000156299, ENSG00000205155, ENSG00000176105, ENSG00000077264, ENSG0000…	2217	86	16792	2.64216	0.00475091	0.000264569	0.00026045
GOTERM_BP_DIRECT	GO:0034097~response to cytokine	22	0.840015	9.73874e-07	ENSG00000175592, ENSG00000130522, ENSG00000136603, ENSG00000165949, ENSG00000162924, ENSG00000104856, ENSG00000115415, ENSG00000181284, ENSG00000171552, ENSG00000077150, ENSG00000145623, ENSG00000035862, ENSG00000087258, ENSG00000120217, ENSG00000180914, ENSG00000148344, ENSG00000162889, ENSG00000161921, ENSG00000102575, ENSG00000141655, ENSG00000102265, ENSG00000140464	2217	52	16792	3.20447	0.0054282	0.000282895	0.000278492
GOTERM_BP_DIRECT	GO:1902042~negative regulation of extrinsic apoptotic signaling pathway via death domain receptors	17	0.649103	1.01233e-06	ENSG00000100292, ENSG00000104689, ENSG00000171560, ENSG00000168040, ENSG00000171564, ENSG00000026103, ENSG00000003402, ENSG00000112175, ENSG00000171557, ENSG00000137275, ENSG00000118503, ENSG00000121858, ENSG00000120889, ENSG00000162734, ENSG00000102871, ENSG00000090339, ENSG00000106366	2217	33	16792	3.90186	0.00564194	0.000282895	0.000278492
GOTERM_BP_DIRECT	GO:0002576~platelet degranulation	33	1.26002	1.85033e-06	ENSG00000171560, ENSG00000171564, ENSG00000137801, ENSG00000115414, ENSG00000116260, ENSG00000100665, ENSG00000127824, ENSG00000259207, ENSG00000102265, ENSG00000035403, ENSG00000106366, ENSG00000130402, ENSG00000071127, ENSG00000197461, ENSG00000072110, ENSG00000110799, ENSG00000105329, ENSG00000196136, ENSG00000142192, ENSG00000197249, ENSG00000005893, ENSG00000197746, ENSG00000171557, ENSG0000…	2217	103	16792	2.42669	0.0102882	0.000492452	0.000484787
GOTERM_BP_DIRECT	GO:0033627~cell adhesion mediated by integrin	11	0.420008	2.50527e-06	ENSG00000091409, ENSG00000161638, ENSG00000137809, ENSG00000136999, ENSG00000166147, ENSG00000150093, ENSG00000138448, ENSG00000164171, ENSG00000259207, ENSG00000084636, ENSG00000090339	2217	15	16792	5.55441	0.0139044	0.000636452	0.000626545
GOTERM_BP_DIRECT	GO:0007264~small GTPase mediated signal transduction	60	2.29095	2.72114e-06	ENSG00000175582, ENSG00000072422, ENSG00000109756, ENSG00000137502, ENSG00000174775, ENSG00000075651, ENSG00000138670, ENSG00000276600, ENSG00000084733, ENSG00000088538, ENSG00000154917, ENSG00000166592, ENSG00000160293, ENSG00000126458, ENSG00000134909, ENSG00000125249, ENSG00000104140, ENSG00000128512, ENSG00000165105, ENSG00000070831, ENSG00000155366, ENSG00000100292, ENSG00000179674, ENSG0000…	2217	246	16792	1.84737	0.0150934	0.000661237	0.000650944
GOTERM_BP_DIRECT	GO:0007010~cytoskeleton organization	44	1.68003	3.3428e-06	ENSG00000111859, ENSG00000197296, ENSG00000099864, ENSG00000176014, ENSG00000099204, ENSG00000197694, ENSG00000213445, ENSG00000130559, ENSG00000243156, ENSG00000152229, ENSG00000064666, ENSG00000137267, ENSG00000176438, ENSG00000137285, ENSG00000120318, ENSG00000116141, ENSG00000127824, ENSG00000185479, ENSG00000127603, ENSG00000128578, ENSG00000158856, ENSG00000130202, ENSG00000146192, ENSG0000…	2217	161	16792	2.06997	0.0185095	0.000756195	0.000744424
GOTERM_BP_DIRECT	GO:0006915~apoptotic process	114	4.35281	3.38251e-06	ENSG00000180370, ENSG00000006432, ENSG00000115310, ENSG00000082397, ENSG00000145779, ENSG00000081189, ENSG00000054523, ENSG00000106799, ENSG00000187838, ENSG00000100290, ENSG00000176720, ENSG00000073282, ENSG00000170855, ENSG00000189067, ENSG00000137193, ENSG00000173846, ENSG00000165553, ENSG00000121858, ENSG00000183087, ENSG00000120889, ENSG00000056558, ENSG00000125657, ENSG00000127831, ENSG0000…	2217	567	16792	1.52285	0.0187273	0.000756195	0.000744424
GOTERM_BP_DIRECT	GO:0045669~positive regulation of osteoblast differentiation	23	0.878198	3.68595e-06	ENSG00000138829, ENSG00000130522, ENSG00000152661, ENSG00000094975, ENSG00000103855, ENSG00000138685, ENSG00000172216, ENSG00000073282, ENSG00000196923, ENSG00000204217, ENSG00000166333, ENSG00000125845, ENSG00000168036, ENSG00000081189, ENSG00000115170, ENSG00000124813, ENSG00000164932, ENSG00000106571, ENSG00000185885, ENSG00000101144, ENSG00000162552, ENSG00000017427, ENSG00000101384	2217	60	16792	2.90344	0.02039	0.000792337	0.000780003
GOTERM_BP_DIRECT	GO:0042127~regulation of cell proliferation	48	1.83276	5.34019e-06	ENSG00000113916, ENSG00000129521, ENSG00000161714, ENSG00000174292, ENSG00000109756, ENSG00000184916, ENSG00000104689, ENSG00000077238, ENSG00000215788, ENSG00000187091, ENSG00000135046, ENSG00000026103, ENSG00000041982, ENSG00000064666, ENSG00000173801, ENSG00000135269, ENSG00000204217, ENSG00000253368, ENSG00000118515, ENSG00000124875, ENSG00000107175, ENSG00000015475, ENSG00000054967, ENSG0000…	2217	185	16792	1.9652	0.0294054	0.00110542	0.00108821
GOTERM_BP_DIRECT	GO:0071260~cellular response to mechanical stimulus	25	0.954563	7.00938e-06	ENSG00000073756, ENSG00000152661, ENSG00000108821, ENSG00000104689, ENSG00000164171, ENSG00000026103, ENSG00000064666, ENSG00000171522, ENSG00000001084, ENSG00000123700, ENSG00000030110, ENSG00000125347, ENSG00000142867, ENSG00000176171, ENSG00000095015, ENSG00000090020, ENSG00000116717, ENSG00000105329, ENSG00000168040, ENSG00000137673, ENSG00000172936, ENSG00000164342, ENSG00000006062, ENSG0000…	2217	71	16792	2.66697	0.0384181	0.00139912	0.00137734
GOTERM_BP_DIRECT	GO:0008284~positive regulation of cell proliferation	96	3.66552	7.66021e-06	ENSG00000134954, ENSG00000175344, ENSG00000105835, ENSG00000113578, ENSG00000174775, ENSG00000197019, ENSG00000138675, ENSG00000175505, ENSG00000058085, ENSG00000164850, ENSG00000168610, ENSG00000141052, ENSG00000148400, ENSG00000164136, ENSG00000141655, ENSG00000095739, ENSG00000140443, ENSG00000104332, ENSG00000196072, ENSG00000175592, ENSG00000106799, ENSG00000213694, ENSG00000156299, ENSG0000…	2217	466	16792	1.56035	0.0419096	0.00147631	0.00145333
GOTERM_BP_DIRECT	GO:0030574~collagen catabolic process	23	0.878198	1.23363e-05	ENSG00000204291, ENSG00000108821, ENSG00000130635, ENSG00000099953, ENSG00000197565, ENSG00000134871, ENSG00000137745, ENSG00000169031, ENSG00000137673, ENSG00000204262, ENSG00000157227, ENSG00000275896, ENSG00000163131, ENSG00000142156, ENSG00000011028, ENSG00000187498, ENSG00000166670, ENSG00000142173, ENSG00000182871, ENSG00000087245, ENSG00000081052, ENSG00000164733, ENSG00000140564	2217	64	16792	2.72198	0.0666249	0.00229826	0.00226248
GOTERM_BP_DIRECT	GO:0042060~wound healing	26	0.992745	2.14934e-05	ENSG00000096696, ENSG00000205420, ENSG00000075275, ENSG00000115414, ENSG00000041982, ENSG00000064666, ENSG00000057019, ENSG00000127603, ENSG00000259207, ENSG00000102265, ENSG00000106799, ENSG00000197461, ENSG00000162738, ENSG00000111145, ENSG00000115009, ENSG00000261150, ENSG00000157168, ENSG00000111186, ENSG00000138685, ENSG00000119699, ENSG00000062038, ENSG00000113083, ENSG00000158055, ENSG0000…	2217	80	16792	2.46161	0.113193	0.00387506	0.00381474
GOTERM_BP_DIRECT	GO:0060333~interferon-gamma-mediated signaling pathway	24	0.91638	2.37857e-05	ENSG00000185507, ENSG00000132109, ENSG00000115415, ENSG00000111335, ENSG00000027697, ENSG00000117228, ENSG00000132274, ENSG00000159128, ENSG00000213928, ENSG00000123609, ENSG00000204592, ENSG00000204525, ENSG00000169403, ENSG00000117595, ENSG00000204642, ENSG00000089127, ENSG00000234745, ENSG00000125347, ENSG00000128604, ENSG00000162645, ENSG00000166710, ENSG00000090339, ENSG00000140464, ENSG0000…	2217	71	16792	2.56029	0.124482	0.00397691	0.003915
GOTERM_BP_DIRECT	GO:0009615~response to virus	32	1.22184	2.40513e-05	ENSG00000185507, ENSG00000106367, ENSG00000137628, ENSG00000111335, ENSG00000027697, ENSG00000132274, ENSG00000142166, ENSG00000089127, ENSG00000081189, ENSG00000133083, ENSG00000159110, ENSG00000148346, ENSG00000102962, ENSG00000107796, ENSG00000172183, ENSG00000175592, ENSG00000130303, ENSG00000159128, ENSG00000115267, ENSG00000157601, ENSG00000143324, ENSG00000172936, ENSG00000172757, ENSG0000…	2217	110	16792	2.2034	0.125781	0.00397691	0.003915
GOTERM_BP_DIRECT	GO:0031175~neuron projection development	30	1.14548	2.4193e-05	ENSG00000177169, ENSG00000109756, ENSG00000165959, ENSG00000130559, ENSG00000015592, ENSG00000039068, ENSG00000144619, ENSG00000047849, ENSG00000177628, ENSG00000196588, ENSG00000110047, ENSG00000135127, ENSG00000164877, ENSG00000196072, ENSG00000078018, ENSG00000091136, ENSG00000108819, ENSG00000159388, ENSG00000142192, ENSG00000158555, ENSG00000176749, ENSG00000152894, ENSG00000174469, ENSG0000…	2217	100	16792	2.27226	0.126473	0.00397691	0.003915
GOTERM_BP_DIRECT	GO:0071560~cellular response to transforming growth factor beta stimulus	19	0.725468	2.70262e-05	ENSG00000104332, ENSG00000106799, ENSG00000105974, ENSG00000108821, ENSG00000105329, ENSG00000135925, ENSG00000134871, ENSG00000176105, ENSG00000154764, ENSG00000169756, ENSG00000166147, ENSG00000100614, ENSG00000081189, ENSG00000185650, ENSG00000078401, ENSG00000101665, ENSG00000086991, ENSG00000162552, ENSG00000148677	2217	49	16792	2.93693	0.140197	0.0042573	0.00419103
GOTERM_BP_DIRECT	GO:0034329~cell junction assembly	9	0.343643	2.74222e-05	ENSG00000169756, ENSG00000166333, ENSG00000196924, ENSG00000075624, ENSG00000128591, ENSG00000125753, ENSG00000162458, ENSG00000072163, ENSG00000184009	2217	12	16792	5.68065	0.142098	0.0042573	0.00419103
GOTERM_BP_DIRECT	GO:0048010~vascular endothelial growth factor receptor signaling pathway	24	0.91638	3.06275e-05	ENSG00000107338, ENSG00000075624, ENSG00000128052, ENSG00000138448, ENSG00000180370, ENSG00000116701, ENSG00000119630, ENSG00000136754, ENSG00000118257, ENSG00000204217, ENSG00000055163, ENSG00000158195, ENSG00000185386, ENSG00000160293, ENSG00000129946, ENSG00000089159, ENSG00000108691, ENSG00000259207, ENSG00000162889, ENSG00000070831, ENSG00000184009, ENSG00000105287, ENSG00000050820, ENSG0000…	2217	72	16792	2.52473	0.15733	0.00462641	0.00455439
GOTERM_BP_DIRECT	GO:0070527~platelet aggregation	17	0.649103	3.15432e-05	ENSG00000181467, ENSG00000075624, ENSG00000072110, ENSG00000171560, ENSG00000171564, ENSG00000171557, ENSG00000101608, ENSG00000196924, ENSG00000166333, ENSG00000183087, ENSG00000159176, ENSG00000100345, ENSG00000101335, ENSG00000259207, ENSG00000184009, ENSG00000035403, ENSG00000106211	2217	41	16792	3.14052	0.161632	0.00463935	0.00456713
GOTERM_BP_DIRECT	GO:0002474~antigen processing and presentation of peptide antigen via MHC class I	14	0.534555	4.75429e-05	ENSG00000113615, ENSG00000168394, ENSG00000138674, ENSG00000153029, ENSG00000204592, ENSG00000204525, ENSG00000231925, ENSG00000100934, ENSG00000204642, ENSG00000204267, ENSG00000234745, ENSG00000164307, ENSG00000164308, ENSG00000166710	2217	30	16792	3.53463	0.233349	0.00662935	0.00652616
GOTERM_BP_DIRECT	GO:0051017~actin filament bundle assembly	14	0.534555	4.75429e-05	ENSG00000133789, ENSG00000158856, ENSG00000128641, ENSG00000050405, ENSG00000111859, ENSG00000130402, ENSG00000072110, ENSG00000113657, ENSG00000173156, ENSG00000136167, ENSG00000187017, ENSG00000075618, ENSG00000070831, ENSG00000102024	2217	30	16792	3.53463	0.233349	0.00662935	0.00652616
GOTERM_BP_DIRECT	GO:0050919~negative chemotaxis	15	0.572738	4.86319e-05	ENSG00000153993, ENSG00000197461, ENSG00000001617, ENSG00000075223, ENSG00000138623, ENSG00000138448, ENSG00000135622, ENSG00000137872, ENSG00000185070, ENSG00000118257, ENSG00000143434, ENSG00000082684, ENSG00000185033, ENSG00000130827, ENSG00000259207	2217	34	16792	3.34156	0.238001	0.00662935	0.00652616
GOTERM_BP_DIRECT	GO:0030334~regulation of cell migration	24	0.91638	4.98329e-05	ENSG00000160789, ENSG00000184916, ENSG00000065320, ENSG00000113657, ENSG00000105329, ENSG00000196576, ENSG00000164093, ENSG00000228741, ENSG00000115310, ENSG00000196924, ENSG00000079385, ENSG00000118515, ENSG00000166670, ENSG00000130827, ENSG00000135919, ENSG00000162614, ENSG00000259207, ENSG00000120063, ENSG00000181649, ENSG00000053747, ENSG00000035403, ENSG00000107201, ENSG00000183943, ENSG0000…	2217	74	16792	2.4565	0.243099	0.00663134	0.00652811
GOTERM_BP_DIRECT	GO:0007267~cell-cell signaling	57	2.1764	6.35672e-05	ENSG00000152661, ENSG00000130513, ENSG00000105835, ENSG00000143590, ENSG00000099822, ENSG00000138675, ENSG00000170214, ENSG00000125845, ENSG00000125726, ENSG00000102962, ENSG00000124875, ENSG00000164136, ENSG00000141655, ENSG00000155090, ENSG00000197093, ENSG00000110218, ENSG00000099617, ENSG00000156453, ENSG00000099139, ENSG00000179431, ENSG00000143816, ENSG00000159840, ENSG00000197965, ENSG0000…	2217	254	16792	1.69972	0.299029	0.00826225	0.00813364
GOTERM_BP_DIRECT	GO:0070374~positive regulation of ERK1 and ERK2 cascade	43	1.64185	6.94993e-05	ENSG00000109756, ENSG00000171560, ENSG00000128052, ENSG00000113578, ENSG00000172575, ENSG00000136235, ENSG00000174775, ENSG00000171564, ENSG00000133048, ENSG00000164850, ENSG00000006210, ENSG00000125845, ENSG00000164251, ENSG00000122694, ENSG00000163823, ENSG00000102962, ENSG00000145431, ENSG00000109670, ENSG00000086991, ENSG00000169508, ENSG00000103034, ENSG00000104312, ENSG00000197461, ENSG0000…	2217	175	16792	1.86109	0.32189	0.00882799	0.00869057
GOTERM_BP_DIRECT	GO:0050900~leukocyte migration	33	1.26002	8.35827e-05	ENSG00000161638, ENSG00000105974, ENSG00000108821, ENSG00000174775, ENSG00000171860, ENSG00000115414, ENSG00000005884, ENSG00000079385, ENSG00000164251, ENSG00000100345, ENSG00000124731, ENSG00000259207, ENSG00000204936, ENSG00000155465, ENSG00000103064, ENSG00000173391, ENSG00000092068, ENSG00000150093, ENSG00000110876, ENSG00000116815, ENSG00000168918, ENSG00000138448, ENSG00000176105, ENSG0000…	2217	122	16792	2.04876	0.373222	0.010381	0.0102194
GOTERM_BP_DIRECT	GO:0008360~regulation of cell shape	36	1.37457	0.000114399	ENSG00000105357, ENSG00000099864, ENSG00000206190, ENSG00000115935, ENSG00000128052, ENSG00000135046, ENSG00000115414, ENSG00000189171, ENSG00000176438, ENSG00000082397, ENSG00000138771, ENSG00000120318, ENSG00000149798, ENSG00000100345, ENSG00000162458, ENSG00000128578, ENSG00000095739, ENSG00000158856, ENSG00000071127, ENSG00000146192, ENSG00000180263, ENSG00000128283, ENSG00000196576, ENSG0000…	2217	140	16792	1.94765	0.472397	0.0138994	0.0136831
GOTERM_BP_DIRECT	GO:0048333~mesodermal cell differentiation	8	0.30546	0.000140078	ENSG00000147050, ENSG00000150093, ENSG00000132470, ENSG00000164171, ENSG00000259207, ENSG00000122641, ENSG00000005884, ENSG00000132510	2217	11	16792	5.50851	0.542945	0.0166574	0.0163981
GOTERM_BP_DIRECT	GO:0032496~response to lipopolysaccharide	40	1.5273	0.000152544	ENSG00000073756, ENSG00000049249, ENSG00000110324, ENSG00000104689, ENSG00000069535, ENSG00000163739, ENSG00000215788, ENSG00000026103, ENSG00000151014, ENSG00000171522, ENSG00000118432, ENSG00000077150, ENSG00000142166, ENSG00000162551, ENSG00000148400, ENSG00000124875, ENSG00000148344, ENSG00000141655, ENSG00000054967, ENSG00000104067, ENSG00000172380, ENSG00000130522, ENSG00000146072, ENSG0000…	2217	164	16792	1.84737	0.57371	0.0176723	0.0173972
GOTERM_BP_DIRECT	GO:0071526~semaphorin-plexin signaling pathway	14	0.534555	0.000154937	ENSG00000153993, ENSG00000001617, ENSG00000105976, ENSG00000075223, ENSG00000006607, ENSG00000138623, ENSG00000196576, ENSG00000135622, ENSG00000137872, ENSG00000143434, ENSG00000082684, ENSG00000196924, ENSG00000185033, ENSG00000130827	2217	33	16792	3.2133	0.579374	0.0176723	0.0173972
GOTERM_BP_DIRECT	GO:0035556~intracellular signal transduction	80	3.0546	0.00017093	ENSG00000176871, ENSG00000095585, ENSG00000109756, ENSG00000071054, ENSG00000105639, ENSG00000187091, ENSG00000171621, ENSG00000155974, ENSG00000170214, ENSG00000149091, ENSG00000100628, ENSG00000146426, ENSG00000169302, ENSG00000171219, ENSG00000118515, ENSG00000120833, ENSG00000163328, ENSG00000079308, ENSG00000169429, ENSG00000275993, ENSG00000162434, ENSG00000185737, ENSG00000151320, ENSG0000…	2217	403	16792	1.50356	0.615345	0.0191065	0.0188091
GOTERM_BP_DIRECT	GO:0097191~extrinsic apoptotic signaling pathway	16	0.61092	0.000180541	ENSG00000104689, ENSG00000105329, ENSG00000006327, ENSG00000111057, ENSG00000168040, ENSG00000026103, ENSG00000170421, ENSG00000164342, ENSG00000137275, ENSG00000213190, ENSG00000185043, ENSG00000125726, ENSG00000232810, ENSG00000102871, ENSG00000122641, ENSG00000140464	2217	42	16792	2.88541	0.635465	0.0197851	0.0194772
GOTERM_BP_DIRECT	GO:0043066~negative regulation of apoptotic process	88	3.36006	0.000198628	ENSG00000071054, ENSG00000074047, ENSG00000135046, ENSG00000180370, ENSG00000119682, ENSG00000154447, ENSG00000003402, ENSG00000154764, ENSG00000113494, ENSG00000169621, ENSG00000145779, ENSG00000168610, ENSG00000120833, ENSG00000153071, ENSG00000140443, ENSG00000085063, ENSG00000104332, ENSG00000105388, ENSG00000105664, ENSG00000127152, ENSG00000173530, ENSG00000171552, ENSG00000073282, ENSG0000…	2217	455	16792	1.4649	0.670522	0.0209016	0.0205763
GOTERM_BP_DIRECT	GO:0006935~chemotaxis	32	1.22184	0.000200355	ENSG00000183625, ENSG00000153551, ENSG00000163739, ENSG00000174775, ENSG00000075651, ENSG00000171860, ENSG00000172215, ENSG00000169403, ENSG00000006210, ENSG00000144648, ENSG00000102007, ENSG00000163823, ENSG00000102962, ENSG00000124875, ENSG00000107175, ENSG00000161921, ENSG00000099937, ENSG00000169429, ENSG00000175592, ENSG00000128340, ENSG00000025708, ENSG00000115009, ENSG00000198910, ENSG0000…	2217	122	16792	1.98668	0.673686	0.0209016	0.0205763
GOTERM_BP_DIRECT	GO:2001237~negative regulation of extrinsic apoptotic signaling pathway	15	0.572738	0.000201948	ENSG00000106799, ENSG00000160789, ENSG00000138448, ENSG00000137801, ENSG00000154447, ENSG00000003402, ENSG00000173039, ENSG00000131981, ENSG00000085733, ENSG00000091409, ENSG00000137275, ENSG00000023909, ENSG00000001084, ENSG00000115170, ENSG00000017427	2217	38	16792	2.98982	0.67658	0.0209016	0.0205763
GOTERM_BP_DIRECT	GO:0051092~positive regulation of NF-kappaB transcription factor activity	34	1.29821	0.000205949	ENSG00000129465, ENSG00000196083, ENSG00000198286, ENSG00000172175, ENSG00000132274, ENSG00000003402, ENSG00000119401, ENSG00000134070, ENSG00000276600, ENSG00000077150, ENSG00000120337, ENSG00000082512, ENSG00000120659, ENSG00000131080, ENSG00000142867, ENSG00000141655, ENSG00000176170, ENSG00000127666, ENSG00000104312, ENSG00000105329, ENSG00000173039, ENSG00000172936, ENSG00000080561, ENSG0000…	2217	133	16792	1.93626	0.683733	0.0209282	0.0206024
GOTERM_BP_DIRECT	GO:0016477~cell migration	41	1.56548	0.000209721	ENSG00000101096, ENSG00000130635, ENSG00000105778, ENSG00000162704, ENSG00000105639, ENSG00000137801, ENSG00000152229, ENSG00000228741, ENSG00000173801, ENSG00000149091, ENSG00000079385, ENSG00000117472, ENSG00000160293, ENSG00000164932, ENSG00000109079, ENSG00000259207, ENSG00000166579, ENSG00000128578, ENSG00000095739, ENSG00000050820, ENSG00000162434, ENSG00000177697, ENSG00000090020, ENSG0000…	2217	172	16792	1.80548	0.690331	0.0209309	0.020605
GOTERM_BP_DIRECT	GO:0033209~tumor necrosis factor-mediated signaling pathway	31	1.18366	0.000249277	ENSG00000131323, ENSG00000049249, ENSG00000104689, ENSG00000175166, ENSG00000215788, ENSG00000115415, ENSG00000111057, ENSG00000026103, ENSG00000240065, ENSG00000120337, ENSG00000120659, ENSG00000131080, ENSG00000125726, ENSG00000089486, ENSG00000141655, ENSG00000054967, ENSG00000023445, ENSG00000146072, ENSG00000204264, ENSG00000006327, ENSG00000173530, ENSG00000170421, ENSG00000110330, ENSG0000…	2217	118	16792	1.98983	0.751766	0.0244423	0.0240618
GOTERM_BP_DIRECT	GO:0006955~immune response	82	3.13097	0.000264487	ENSG00000174130, ENSG00000196083, ENSG00000049249, ENSG00000134954, ENSG00000077238, ENSG00000263528, ENSG00000103855, ENSG00000204592, ENSG00000141574, ENSG00000115590, ENSG00000144648, ENSG00000125726, ENSG00000148400, ENSG00000109079, ENSG00000130508, ENSG00000102962, ENSG00000124875, ENSG00000169508, ENSG00000164136, ENSG00000054967, ENSG00000166710, ENSG00000169429, ENSG00000140443, ENSG0000…	2217	421	16792	1.47526	0.772001	0.0254865	0.0250898
GOTERM_BP_DIRECT	GO:0010862~positive regulation of pathway-restricted SMAD protein phosphorylation	17	0.649103	0.000278541	ENSG00000106799, ENSG00000156574, ENSG00000130513, ENSG00000105329, ENSG00000116985, ENSG00000112175, ENSG00000119699, ENSG00000204217, ENSG00000163083, ENSG00000168487, ENSG00000125845, ENSG00000115170, ENSG00000183682, ENSG00000153071, ENSG00000164404, ENSG00000101144, ENSG00000122641	2217	48	16792	2.68253	0.789228	0.0263858	0.0259751
GOTERM_BP_DIRECT	GO:0031581~hemidesmosome assembly	8	0.30546	0.000297797	ENSG00000091409, ENSG00000177697, ENSG00000151914, ENSG00000178209, ENSG00000132470, ENSG00000186847, ENSG00000053747, ENSG00000058085	2217	12	16792	5.04947	0.81074	0.0277398	0.027308
GOTERM_BP_DIRECT	GO:0030501~positive regulation of bone mineralization	14	0.534555	0.000309078	ENSG00000138829, ENSG00000187608, ENSG00000105329, ENSG00000103855, ENSG00000169252, ENSG00000137203, ENSG00000177119, ENSG00000119699, ENSG00000204217, ENSG00000125845, ENSG00000081189, ENSG00000115170, ENSG00000101144, ENSG00000162552	2217	35	16792	3.02968	0.822308	0.0283187	0.0278778
GOTERM_BP_DIRECT	GO:0046579~positive regulation of Ras protein signal transduction	10	0.381825	0.000316377	ENSG00000184371, ENSG00000134250, ENSG00000157680, ENSG00000108061, ENSG00000172575, ENSG00000174775, ENSG00000049130, ENSG00000157168, ENSG00000134259, ENSG00000017427	2217	19	16792	3.98642	0.829413	0.0285199	0.0280759
GOTERM_BP_DIRECT	GO:0030316~osteoclast differentiation	11	0.420008	0.000348549	ENSG00000184371, ENSG00000081087, ENSG00000099617, ENSG00000120659, ENSG00000168036, ENSG00000006607, ENSG00000232810, ENSG00000072274, ENSG00000169508, ENSG00000141655, ENSG00000033327	2217	23	16792	3.62244	0.857495	0.0307157	0.0302375
GOTERM_BP_DIRECT	GO:0035987~endodermal cell differentiation	12	0.45819	0.000351727	ENSG00000142156, ENSG00000161638, ENSG00000082781, ENSG00000156574, ENSG00000091136, ENSG00000134871, ENSG00000138448, ENSG00000087245, ENSG00000115414, ENSG00000053747, ENSG00000122641, ENSG00000157227	2217	27	16792	3.36631	0.860005	0.0307157	0.0302375
GOTERM_BP_DIRECT	GO:0007229~integrin-mediated signaling pathway	27	1.03093	0.000364489	ENSG00000161638, ENSG00000111859, ENSG00000137809, ENSG00000105855, ENSG00000132470, ENSG00000164171, ENSG00000137845, ENSG00000005884, ENSG00000166333, ENSG00000148848, ENSG00000079385, ENSG00000153071, ENSG00000100345, ENSG00000259207, ENSG00000050820, ENSG00000150093, ENSG00000138623, ENSG00000033170, ENSG00000138448, ENSG00000159840, ENSG00000084636, ENSG00000091409, ENSG00000136280, ENSG0000…	2217	99	16792	2.06569	0.869646	0.0308214	0.0303417
GOTERM_BP_DIRECT	GO:0051607~defense response to virus	39	1.48912	0.000366227	ENSG00000110944, ENSG00000187608, ENSG00000137628, ENSG00000159674, ENSG00000115415, ENSG00000111335, ENSG00000132274, ENSG00000213928, ENSG00000142166, ENSG00000092929, ENSG00000089127, ENSG00000164251, ENSG00000159110, ENSG00000125347, ENSG00000176171, ENSG00000163565, ENSG00000185436, ENSG00000127666, ENSG00000140464, ENSG00000172183, ENSG00000130303, ENSG00000132824, ENSG00000243646, ENSG0000…	2217	165	16792	1.79027	0.870906	0.0308214	0.0303417
GOTERM_BP_DIRECT	GO:0001501~skeletal system development	34	1.29821	0.000369482	ENSG00000154122, ENSG00000069011, ENSG00000108821, ENSG00000140937, ENSG00000184916, ENSG00000104447, ENSG00000074047, ENSG00000038295, ENSG00000116985, ENSG00000174705, ENSG00000162551, ENSG00000125845, ENSG00000049089, ENSG00000141753, ENSG00000155090, ENSG00000163501, ENSG00000102174, ENSG00000105664, ENSG00000106799, ENSG00000111424, ENSG00000113389, ENSG00000112175, ENSG00000204262, ENSG0000…	2217	137	16792	1.87973	0.873235	0.0308214	0.0303417
GOTERM_BP_DIRECT	GO:0071407~cellular response to organic cyclic compound	19	0.725468	0.000411517	ENSG00000105329, ENSG00000074047, ENSG00000115415, ENSG00000180370, ENSG00000077264, ENSG00000172216, ENSG00000091409, ENSG00000168610, ENSG00000162551, ENSG00000125845, ENSG00000232810, ENSG00000147509, ENSG00000164305, ENSG00000155380, ENSG00000108691, ENSG00000163659, ENSG00000127314, ENSG00000100097, ENSG00000148677	2217	59	16792	2.43915	0.899786	0.0333329	0.032814
GOTERM_BP_DIRECT	GO:0043406~positive regulation of MAP kinase activity	19	0.725468	0.000411517	ENSG00000197461, ENSG00000105329, ENSG00000113578, ENSG00000172575, ENSG00000174775, ENSG00000138735, ENSG00000138685, ENSG00000080815, ENSG00000166333, ENSG00000120659, ENSG00000081189, ENSG00000078401, ENSG00000232810, ENSG00000145431, ENSG00000049130, ENSG00000100311, ENSG00000086991, ENSG00000176490, ENSG00000272398	2217	59	16792	2.43915	0.899786	0.0333329	0.032814
GOTERM_BP_DIRECT	GO:0007266~Rho protein signal transduction	17	0.649103	0.000469766	ENSG00000113916, ENSG00000131037, ENSG00000162738, ENSG00000128283, ENSG00000173156, ENSG00000213977, ENSG00000075275, ENSG00000114993, ENSG00000177106, ENSG00000172757, ENSG00000205336, ENSG00000149798, ENSG00000160145, ENSG00000167617, ENSG00000120063, ENSG00000106683, ENSG00000146535	2217	50	16792	2.57523	0.927643	0.037263	0.036683
GOTERM_BP_DIRECT	GO:0007259~JAK-STAT cascade	13	0.496373	0.000473372	ENSG00000126561, ENSG00000115415, ENSG00000123609, ENSG00000175505, ENSG00000138378, ENSG00000170677, ENSG00000142166, ENSG00000168610, ENSG00000134470, ENSG00000120833, ENSG00000159110, ENSG00000108691, ENSG00000184557	2217	32	16792	3.07702	0.929087	0.037263	0.036683
GOTERM_BP_DIRECT	GO:0042493~response to drug	62	2.36732	0.000480356	ENSG00000179546, ENSG00000073756, ENSG00000108821, ENSG00000069535, ENSG00000135046, ENSG00000164171, ENSG00000166311, ENSG00000196839, ENSG00000168610, ENSG00000132170, ENSG00000030110, ENSG00000121769, ENSG00000130707, ENSG00000145730, ENSG00000166710, ENSG00000162433, ENSG00000165029, ENSG00000104067, ENSG00000104332, ENSG00000175592, ENSG00000130522, ENSG00000075223, ENSG00000110092, ENSG0000…	2217	304	16792	1.54474	0.931803	0.0372876	0.0367072
GOTERM_BP_DIRECT	GO:0010628~positive regulation of gene expression	55	2.10004	0.0005079	ENSG00000152661, ENSG00000135925, ENSG00000174775, ENSG00000117139, ENSG00000164850, ENSG00000168610, ENSG00000125845, ENSG00000081189, ENSG00000158286, ENSG00000070831, ENSG00000185359, ENSG00000136826, ENSG00000106799, ENSG00000128165, ENSG00000111424, ENSG00000169756, ENSG00000137073, ENSG00000164342, ENSG00000184371, ENSG00000198929, ENSG00000062038, ENSG00000165030, ENSG00000183087, ENSG0000…	2217	262	16792	1.59	0.941538	0.0380577	0.0374653
GOTERM_BP_DIRECT	GO:2000352~negative regulation of endothelial cell apoptotic process	12	0.45819	0.000510704	ENSG00000095752, ENSG00000168884, ENSG00000118503, ENSG00000167772, ENSG00000171560, ENSG00000183087, ENSG00000128052, ENSG00000171564, ENSG00000136634, ENSG00000090339, ENSG00000171557, ENSG00000106366	2217	28	16792	3.24609	0.942447	0.0380577	0.0374653
GOTERM_BP_DIRECT	GO:0016339~calcium-dependent cell-cell adhesion via plasma membrane cell adhesion molecules	12	0.45819	0.000510704	ENSG00000099889, ENSG00000170558, ENSG00000253953, ENSG00000187372, ENSG00000120324, ENSG00000177839, ENSG00000113209, ENSG00000120327, ENSG00000166341, ENSG00000240184, ENSG00000112852, ENSG00000272674	2217	28	16792	3.24609	0.942447	0.0380577	0.0374653
GOTERM_BP_DIRECT	GO:0046330~positive regulation of JNK cascade	20	0.76365	0.000524553	ENSG00000136848, ENSG00000104312, ENSG00000155760, ENSG00000116717, ENSG00000130758, ENSG00000115008, ENSG00000172575, ENSG00000174775, ENSG00000099860, ENSG00000173545, ENSG00000154764, ENSG00000172936, ENSG00000164342, ENSG00000137275, ENSG00000124602, ENSG00000131080, ENSG00000164251, ENSG00000232810, ENSG00000070831, ENSG00000101265	2217	65	16792	2.33052	0.946736	0.0385754	0.0379749
GOTERM_BP_DIRECT	GO:0035023~regulation of Rho protein signal transduction	23	0.878198	0.000611004	ENSG00000131037, ENSG00000178038, ENSG00000146192, ENSG00000074964, ENSG00000156299, ENSG00000113319, ENSG00000180263, ENSG00000006607, ENSG00000171680, ENSG00000170681, ENSG00000136002, ENSG00000038382, ENSG00000228741, ENSG00000177106, ENSG00000159842, ENSG00000146426, ENSG00000008323, ENSG00000160293, ENSG00000183111, ENSG00000160145, ENSG00000165801, ENSG00000126822, ENSG00000120278	2217	81	16792	2.1507	0.967155	0.0443494	0.043659
GOTERM_BP_DIRECT	GO:0019885~antigen processing and presentation of endogenous peptide antigen via MHC class I	6	0.229095	0.000663829	ENSG00000231925, ENSG00000204267, ENSG00000168394, ENSG00000164307, ENSG00000164308, ENSG00000166710	2217	7	16792	6.49217	0.975556	0.0475659	0.0468254
GOTERM_BP_DIRECT	GO:0032486~Rap protein signal transduction	7	0.267278	0.000684438	ENSG00000181467, ENSG00000116473, ENSG00000109756, ENSG00000125249, ENSG00000107263, ENSG00000127314, ENSG00000145632	2217	10	16792	5.30194	0.978217	0.0484218	0.047668
GOTERM_BP_DIRECT	GO:0045746~negative regulation of Notch signaling pathway	12	0.45819	0.000725474	ENSG00000151917, ENSG00000113916, ENSG00000164683, ENSG00000181830, ENSG00000176907, ENSG00000198435, ENSG00000115844, ENSG00000109670, ENSG00000158555, ENSG00000101144, ENSG00000157227, ENSG00000185559	2217	29	16792	3.13415	0.982684	0.0490259	0.0482627
GOTERM_BP_DIRECT	GO:1902041~regulation of extrinsic apoptotic signaling pathway via death domain receptors	9	0.343643	0.000728063	ENSG00000137275, ENSG00000121858, ENSG00000104689, ENSG00000120889, ENSG00000168040, ENSG00000026103, ENSG00000003402, ENSG00000102871, ENSG00000131981	2217	17	16792	4.00987	0.982933	0.0490259	0.0482627
GOTERM_BP_DIRECT	GO:0046847~filopodium assembly	9	0.343643	0.000728063	ENSG00000197959, ENSG00000091409, ENSG00000146192, ENSG00000180263, ENSG00000108819, ENSG00000136002, ENSG00000070831, ENSG00000228741, ENSG00000267534	2217	17	16792	4.00987	0.982933	0.0490259	0.0482627
GOTERM_BP_DIRECT	GO:0031589~cell-substrate adhesion	9	0.343643	0.000728063	ENSG00000091409, ENSG00000161638, ENSG00000150093, ENSG00000110799, ENSG00000183087, ENSG00000138448, ENSG00000164171, ENSG00000259207, ENSG00000183943	2217	17	16792	4.00987	0.982933	0.0490259	0.0482627
GOTERM_BP_DIRECT	GO:0007015~actin filament organization	21	0.801833	0.000779522	ENSG00000154553, ENSG00000128872, ENSG00000128641, ENSG00000241978, ENSG00000113758, ENSG00000072110, ENSG00000128340, ENSG00000108819, ENSG00000198467, ENSG00000167460, ENSG00000044115, ENSG00000134775, ENSG00000172602, ENSG00000138594, ENSG00000034510, ENSG00000143549, ENSG00000158352, ENSG00000149798, ENSG00000075618, ENSG00000163554, ENSG00000050820	2217	72	16792	2.20914	0.987202	0.0514442	0.0506434
GOTERM_BP_DIRECT	GO:0042730~fibrinolysis	10	0.381825	0.000785653	ENSG00000104368, ENSG00000187045, ENSG00000171560, ENSG00000182718, ENSG00000171564, ENSG00000131187, ENSG00000122861, ENSG00000171557, ENSG00000106366, ENSG00000011422	2217	21	16792	3.60676	0.987633	0.0514442	0.0506434
GOTERM_BP_DIRECT	GO:0043547~positive regulation of GTPase activity	102	3.89462	0.000791591	ENSG00000136895, ENSG00000105639, ENSG00000174775, ENSG00000175984, ENSG00000138675, ENSG00000138670, ENSG00000184060, ENSG00000088538, ENSG00000134909, ENSG00000142669, ENSG00000128512, ENSG00000162552, ENSG00000162434, ENSG00000180263, ENSG00000038382, ENSG00000138685, ENSG00000169756, ENSG00000091409, ENSG00000116991, ENSG00000116473, ENSG00000008323, ENSG00000160145, ENSG00000108691, ENSG0000…	2217	565	16792	1.36738	0.988037	0.0514442	0.0506434
GOTERM_BP_DIRECT	GO:0006919~activation of cysteine-type endopeptidase activity involved in apoptotic process	23	0.878198	0.000874605	ENSG00000129521, ENSG00000165949, ENSG00000177076, ENSG00000104689, ENSG00000168040, ENSG00000169031, ENSG00000026103, ENSG00000117525, ENSG00000176720, ENSG00000134259, ENSG00000169855, ENSG00000137275, ENSG00000147889, ENSG00000167034, ENSG00000185088, ENSG00000132170, ENSG00000121858, ENSG00000232810, ENSG00000120889, ENSG00000164305, ENSG00000015475, ENSG00000102871, ENSG00000140464	2217	83	16792	2.09887	0.992481	0.055417	0.0545543
GOTERM_BP_DIRECT	GO:0010951~negative regulation of endopeptidase activity	30	1.14548	0.000885681	ENSG00000021355, ENSG00000124570, ENSG00000196104, ENSG00000206075, ENSG00000150938, ENSG00000224389, ENSG00000035862, ENSG00000100767, ENSG00000188488, ENSG00000102109, ENSG00000100665, ENSG00000124116, ENSG00000135919, ENSG00000099937, ENSG00000102265, ENSG00000106366, ENSG00000140564, ENSG00000130303, ENSG00000215018, ENSG00000196136, ENSG00000142192, ENSG00000169031, ENSG00000197249, ENSG0000…	2217	121	16792	1.8779	0.992933	0.055417	0.0545543
GOTERM_BP_DIRECT	GO:0071356~cellular response to tumor necrosis factor	28	1.06911	0.000891693	ENSG00000108821, ENSG00000136378, ENSG00000177628, ENSG00000137801, ENSG00000133048, ENSG00000132376, ENSG00000164850, ENSG00000006210, ENSG00000185650, ENSG00000148346, ENSG00000102962, ENSG00000130707, ENSG00000169429, ENSG00000136848, ENSG00000104332, ENSG00000146072, ENSG00000116815, ENSG00000115009, ENSG00000173039, ENSG00000060138, ENSG00000137275, ENSG00000167034, ENSG00000185043, ENSG0000…	2217	110	16792	1.92798	0.993166	0.055417	0.0545543
GOTERM_BP_DIRECT	GO:0043588~skin development	13	0.496373	0.000892383	ENSG00000132932, ENSG00000197461, ENSG00000130635, ENSG00000135925, ENSG00000132470, ENSG00000173801, ENSG00000204262, ENSG00000005884, ENSG00000091409, ENSG00000167114, ENSG00000172818, ENSG00000188910, ENSG00000227507	2217	34	16792	2.89602	0.993193	0.055417	0.0545543
GOTERM_BP_DIRECT	GO:0045773~positive regulation of axon extension	12	0.45819	0.00101016	ENSG00000166333, ENSG00000131711, ENSG00000065320, ENSG00000138623, ENSG00000006327, ENSG00000198910, ENSG00000127603, ENSG00000157168, ENSG00000115414, ENSG00000106683, ENSG00000166579, ENSG00000247596	2217	30	16792	3.02968	0.996478	0.0615659	0.0606075
GOTERM_BP_DIRECT	GO:0010839~negative regulation of keratinocyte proliferation	8	0.30546	0.00101343	ENSG00000119138, ENSG00000111424, ENSG00000175793, ENSG00000261150, ENSG00000125266, ENSG00000152894, ENSG00000019549, ENSG00000156535	2217	14	16792	4.32811	0.996542	0.0615659	0.0606075
GOTERM_BP_DIRECT	GO:0072661~protein targeting to plasma membrane	11	0.420008	0.00111243	ENSG00000101608, ENSG00000179820, ENSG00000145506, ENSG00000099864, ENSG00000183087, ENSG00000182718, ENSG00000198742, ENSG00000175115, ENSG00000088992, ENSG00000132376, ENSG00000013016	2217	26	16792	3.20447	0.998012	0.0655149	0.0644951
GOTERM_BP_DIRECT	GO:2001238~positive regulation of extrinsic apoptotic signaling pathway	11	0.420008	0.00111243	ENSG00000137275, ENSG00000164850, ENSG00000105974, ENSG00000083799, ENSG00000121858, ENSG00000006327, ENSG00000180370, ENSG00000142867, ENSG00000168040, ENSG00000015475, ENSG00000140464	2217	26	16792	3.20447	0.998012	0.0655149	0.0644951
GOTERM_BP_DIRECT	GO:0010977~negative regulation of neuron projection development	15	0.572738	0.0011136	ENSG00000072832, ENSG00000135679, ENSG00000132359, ENSG00000113657, ENSG00000026025, ENSG00000163291, ENSG00000152377, ENSG00000175745, ENSG00000144724, ENSG00000134470, ENSG00000185043, ENSG00000109099, ENSG00000123384, ENSG00000166710, ENSG00000100097	2217	44	16792	2.58211	0.998025	0.0655149	0.0644951
GOTERM_BP_DIRECT	GO:0010508~positive regulation of autophagy	14	0.534555	0.00133293	ENSG00000177169, ENSG00000186815, ENSG00000132109, ENSG00000176641, ENSG00000164938, ENSG00000162409, ENSG00000132274, ENSG00000097033, ENSG00000080561, ENSG00000150907, ENSG00000176171, ENSG00000078804, ENSG00000127666, ENSG00000145632	2217	40	16792	2.65097	0.999421	0.0776016	0.0763937
GOTERM_BP_DIRECT	GO:0007265~Ras protein signal transduction	20	0.76365	0.00141156	ENSG00000065320, ENSG00000172575, ENSG00000174775, ENSG00000152689, ENSG00000075651, ENSG00000138685, ENSG00000141068, ENSG00000143622, ENSG00000147889, ENSG00000158186, ENSG00000185386, ENSG00000108061, ENSG00000126458, ENSG00000078369, ENSG00000129946, ENSG00000162889, ENSG00000089234, ENSG00000017427, ENSG00000124762, ENSG00000145632	2217	70	16792	2.16406	0.999627	0.0811476	0.0798844
GOTERM_BP_DIRECT	GO:0071363~cellular response to growth factor stimulus	15	0.572738	0.00142288	ENSG00000136826, ENSG00000104332, ENSG00000135679, ENSG00000068971, ENSG00000137801, ENSG00000177426, ENSG00000247596, ENSG00000137275, ENSG00000198807, ENSG00000185043, ENSG00000168036, ENSG00000183087, ENSG00000166736, ENSG00000100311, ENSG00000149557	2217	45	16792	2.52473	0.99965	0.0811476	0.0798844
GOTERM_BP_DIRECT	GO:0043627~response to estrogen	19	0.725468	0.00145455	ENSG00000179862, ENSG00000105974, ENSG00000100292, ENSG00000147571, ENSG00000077238, ENSG00000177628, ENSG00000044115, ENSG00000171345, ENSG00000134333, ENSG00000154764, ENSG00000157227, ENSG00000119699, ENSG00000110092, ENSG00000164761, ENSG00000132170, ENSG00000130429, ENSG00000091831, ENSG00000106571, ENSG00000272398	2217	65	16792	2.214	0.999707	0.0821158	0.0808375
GOTERM_BP_DIRECT	GO:0051260~protein homooligomerization	39	1.48912	0.00149774	ENSG00000129465, ENSG00000105974, ENSG00000113657, ENSG00000263528, ENSG00000136816, ENSG00000110047, ENSG00000026103, ENSG00000067715, ENSG00000198959, ENSG00000120659, ENSG00000008294, ENSG00000187134, ENSG00000109079, ENSG00000162975, ENSG00000142867, ENSG00000015475, ENSG00000145730, ENSG00000183775, ENSG00000184743, ENSG00000163347, ENSG00000013016, ENSG00000134504, ENSG00000109846, ENSG0000…	2217	177	16792	1.66889	0.99977	0.0830832	0.0817899
GOTERM_BP_DIRECT	GO:0007166~cell surface receptor signaling pathway	55	2.10004	0.00150141	ENSG00000110900, ENSG00000131724, ENSG00000135046, ENSG00000174775, ENSG00000114423, ENSG00000134198, ENSG00000175505, ENSG00000150048, ENSG00000003400, ENSG00000113494, ENSG00000169621, ENSG00000085063, ENSG00000150471, ENSG00000177697, ENSG00000169031, ENSG00000135452, ENSG00000159128, ENSG00000110330, ENSG00000010278, ENSG00000184292, ENSG00000121858, ENSG00000120889, ENSG00000078401, ENSG0000…	2217	274	16792	1.52037	0.999775	0.0830832	0.0817899
GOTERM_BP_DIRECT	GO:0033077~T cell differentiation in thymus	11	0.420008	0.00155991	ENSG00000129465, ENSG00000155760, ENSG00000204103, ENSG00000168036, ENSG00000127152, ENSG00000185650, ENSG00000106571, ENSG00000168040, ENSG00000166710, ENSG00000174405, ENSG00000166349	2217	27	16792	3.08578	0.999838	0.0847637	0.0834443
GOTERM_BP_DIRECT	GO:0014909~smooth muscle cell migration	6	0.229095	0.00157728	ENSG00000136999, ENSG00000104368, ENSG00000162704, ENSG00000160145, ENSG00000259207, ENSG00000122861	2217	8	16792	5.68065	0.999853	0.0847637	0.0834443
GOTERM_BP_DIRECT	GO:0030042~actin filament depolymerization	6	0.229095	0.00157728	ENSG00000172757, ENSG00000133816, ENSG00000108819, ENSG00000243156, ENSG00000135596, ENSG00000127831	2217	8	16792	5.68065	0.999853	0.0847637	0.0834443
GOTERM_BP_DIRECT	GO:0045104~intermediate filament cytoskeleton organization	8	0.30546	0.00168467	ENSG00000151914, ENSG00000182253, ENSG00000111057, ENSG00000186832, ENSG00000205420, ENSG00000170465, ENSG00000180921, ENSG00000066427	2217	15	16792	4.03957	0.999919	0.089265	0.0878755
GOTERM_BP_DIRECT	GO:0097190~apoptotic signaling pathway	20	0.76365	0.00169299	ENSG00000129465, ENSG00000146072, ENSG00000105974, ENSG00000165949, ENSG00000215788, ENSG00000168040, ENSG00000026103, ENSG00000003400, ENSG00000164342, ENSG00000137275, ENSG00000251201, ENSG00000164761, ENSG00000166224, ENSG00000030110, ENSG00000213190, ENSG00000164305, ENSG00000141655, ENSG00000054967, ENSG00000127666, ENSG00000167657	2217	71	16792	2.13358	0.999923	0.089265	0.0878755
GOTERM_BP_DIRECT	GO:0007416~synapse assembly	18	0.687285	0.00180693	ENSG00000150471, ENSG00000176697, ENSG00000113209, ENSG00000039068, ENSG00000112852, ENSG00000157168, ENSG00000154764, ENSG00000173898, ENSG00000197959, ENSG00000251322, ENSG00000187372, ENSG00000120324, ENSG00000177839, ENSG00000120327, ENSG00000184564, ENSG00000087085, ENSG00000146555, ENSG00000272674	2217	61	16792	2.23501	0.999959	0.0935976	0.0921406
GOTERM_BP_DIRECT	GO:0045766~positive regulation of angiogenesis	28	1.06911	0.00180865	ENSG00000183625, ENSG00000134954, ENSG00000175344, ENSG00000128052, ENSG00000113578, ENSG00000171860, ENSG00000137801, ENSG00000133048, ENSG00000006210, ENSG00000138772, ENSG00000126458, ENSG00000169429, ENSG00000176170, ENSG00000106366, ENSG00000128165, ENSG00000100292, ENSG00000156574, ENSG00000115008, ENSG00000117525, ENSG00000138685, ENSG00000171236, ENSG00000119630, ENSG00000143369, ENSG0000…	2217	115	16792	1.84415	0.99996	0.0935976	0.0921406
GOTERM_BP_DIRECT	GO:0030308~negative regulation of cell growth	29	1.10729	0.0018945	ENSG00000113916, ENSG00000135924, ENSG00000174292, ENSG00000152661, ENSG00000136999, ENSG00000213445, ENSG00000197019, ENSG00000115310, ENSG00000204217, ENSG00000167565, ENSG00000132170, ENSG00000135919, ENSG00000057019, ENSG00000101076, ENSG00000140464, ENSG00000129355, ENSG00000104332, ENSG00000109846, ENSG00000130303, ENSG00000130766, ENSG00000105329, ENSG00000108819, ENSG00000147889, ENSG0000…	2217	121	16792	1.8153	0.999975	0.0971407	0.0956286
GOTERM_BP_DIRECT	GO:2001240~negative regulation of extrinsic apoptotic signaling pathway in absence of ligand	13	0.496373	0.00206419	ENSG00000107731, ENSG00000112319, ENSG00000115008, ENSG00000157168, ENSG00000171552, ENSG00000044115, ENSG00000064655, ENSG00000137275, ENSG00000006210, ENSG00000126709, ENSG00000168621, ENSG00000232810, ENSG00000019549	2217	37	16792	2.66121	0.99999	0.103935	0.102317
GOTERM_BP_DIRECT	GO:0034332~adherens junction organization	13	0.496373	0.00206419	ENSG00000105245, ENSG00000130202, ENSG00000096696, ENSG00000140937, ENSG00000039068, ENSG00000044115, ENSG00000110400, ENSG00000173801, ENSG00000170558, ENSG00000113361, ENSG00000143217, ENSG00000062038, ENSG00000070831	2217	37	16792	2.66121	0.99999	0.103935	0.102317
GOTERM_BP_DIRECT	GO:0071230~cellular response to amino acid stimulus	15	0.572738	0.00225791	ENSG00000108821, ENSG00000130766, ENSG00000148053, ENSG00000197565, ENSG00000171552, ENSG00000162909, ENSG00000172216, ENSG00000084636, ENSG00000204262, ENSG00000142156, ENSG00000187498, ENSG00000232810, ENSG00000145431, ENSG00000087245, ENSG00000130707	2217	47	16792	2.4173	0.999997	0.112674	0.11092
GOTERM_BP_DIRECT	GO:0030336~negative regulation of cell migration	24	0.91638	0.00250479	ENSG00000104332, ENSG00000181467, ENSG00000130303, ENSG00000198420, ENSG00000113657, ENSG00000164938, ENSG00000261150, ENSG00000064666, ENSG00000057294, ENSG00000152894, ENSG00000169855, ENSG00000006210, ENSG00000168675, ENSG00000120318, ENSG00000126458, ENSG00000140526, ENSG00000186832, ENSG00000101665, ENSG00000185885, ENSG00000125249, ENSG00000162552, ENSG00000035403, ENSG00000106366, ENSG0000…	2217	95	16792	1.91348	0.999999	0.123887	0.121959
GOTERM_BP_DIRECT	GO:0007399~nervous system development	56	2.13822	0.00260667	ENSG00000128872, ENSG00000130479, ENSG00000137941, ENSG00000066427, ENSG00000138675, ENSG00000166311, ENSG00000168610, ENSG00000171617, ENSG00000081189, ENSG00000106683, ENSG00000087085, ENSG00000126970, ENSG00000072832, ENSG00000156453, ENSG00000113248, ENSG00000188290, ENSG00000138685, ENSG00000152377, ENSG00000151640, ENSG00000168621, ENSG00000204103, ENSG00000169554, ENSG00000160145, ENSG0000…	2217	287	16792	1.47789	1	0.127795	0.125806
GOTERM_BP_DIRECT	GO:1900006~positive regulation of dendrite development	8	0.30546	0.0026561	ENSG00000136848, ENSG00000196083, ENSG00000130779, ENSG00000106460, ENSG00000106078, ENSG00000101144, ENSG00000112175, ENSG00000147852	2217	16	16792	3.7871	1	0.128158	0.126163
GOTERM_BP_DIRECT	GO:0008625~extrinsic apoptotic signaling pathway via death domain receptors	13	0.496373	0.00265993	ENSG00000136848, ENSG00000196072, ENSG00000049249, ENSG00000104689, ENSG00000168040, ENSG00000173530, ENSG00000026103, ENSG00000134259, ENSG00000003400, ENSG00000232810, ENSG00000120889, ENSG00000015475, ENSG00000102871	2217	38	16792	2.59117	1	0.128158	0.126163
GOTERM_BP_DIRECT	GO:0007160~cell-matrix adhesion	23	0.878198	0.00270372	ENSG00000137809, ENSG00000156299, ENSG00000150093, ENSG00000105855, ENSG00000171560, ENSG00000131626, ENSG00000138448, ENSG00000132470, ENSG00000171564, ENSG00000159840, ENSG00000164171, ENSG00000116962, ENSG00000171557, ENSG00000005884, ENSG00000166333, ENSG00000091409, ENSG00000082781, ENSG00000168036, ENSG00000124466, ENSG00000089159, ENSG00000259207, ENSG00000145113, ENSG00000035403	2217	90	16792	1.93563	1	0.129155	0.127144
GOTERM_BP_DIRECT	GO:0048008~platelet-derived growth factor receptor signaling pathway	11	0.420008	0.00288876	ENSG00000144655, ENSG00000107679, ENSG00000197461, ENSG00000166224, ENSG00000104368, ENSG00000157483, ENSG00000145431, ENSG00000100311, ENSG00000163659, ENSG00000107263, ENSG00000050820	2217	29	16792	2.87297	1	0.136825	0.134695
GOTERM_BP_DIRECT	GO:0001938~positive regulation of endothelial cell proliferation	19	0.725468	0.00300204	ENSG00000183625, ENSG00000105971, ENSG00000106799, ENSG00000126561, ENSG00000117707, ENSG00000128052, ENSG00000198435, ENSG00000117525, ENSG00000138685, ENSG00000171236, ENSG00000119630, ENSG00000118257, ENSG00000204217, ENSG00000143369, ENSG00000125845, ENSG00000108691, ENSG00000100311, ENSG00000259207, ENSG00000105287	2217	69	16792	2.08565	1	0.140995	0.1388
GOTERM_BP_DIRECT	GO:0043589~skin morphogenesis	6	0.229095	0.00316352	ENSG00000108821, ENSG00000177628, ENSG00000164171, ENSG00000204539, ENSG00000080815, ENSG00000073282	2217	9	16792	5.04947	1	0.144598	0.142347
GOTERM_BP_DIRECT	GO:0002237~response to molecule of bacterial origin	6	0.229095	0.00316352	ENSG00000118503, ENSG00000172175, ENSG00000142867, ENSG00000136634, ENSG00000169429, ENSG00000272398	2217	9	16792	5.04947	1	0.144598	0.142347
GOTERM_BP_DIRECT	GO:0070886~positive regulation of calcineurin-NFAT signaling cascade	6	0.229095	0.00316352	ENSG00000151320, ENSG00000090020, ENSG00000185043, ENSG00000071282, ENSG00000157168, ENSG00000017427	2217	9	16792	5.04947	1	0.144598	0.142347
GOTERM_BP_DIRECT	GO:0097192~extrinsic apoptotic signaling pathway in absence of ligand	12	0.45819	0.00320531	ENSG00000030110, ENSG00000099875, ENSG00000115008, ENSG00000164305, ENSG00000138448, ENSG00000148346, ENSG00000168040, ENSG00000049130, ENSG00000026103, ENSG00000171552, ENSG00000176720, ENSG00000064655	2217	34	16792	2.67325	1	0.144598	0.142347
GOTERM_BP_DIRECT	GO:0019221~cytokine-mediated signaling pathway	30	1.14548	0.00320811	ENSG00000128594, ENSG00000110324, ENSG00000131724, ENSG00000175505, ENSG00000138378, ENSG00000170677, ENSG00000185070, ENSG00000198959, ENSG00000148948, ENSG00000006210, ENSG00000168610, ENSG00000134470, ENSG00000120659, ENSG00000115590, ENSG00000120833, ENSG00000102007, ENSG00000127129, ENSG00000163823, ENSG00000185436, ENSG00000105245, ENSG00000243646, ENSG00000115008, ENSG00000117525, ENSG0000…	2217	131	16792	1.73455	1	0.144598	0.142347
GOTERM_BP_DIRECT	GO:0009612~response to mechanical stimulus	17	0.649103	0.00329132	ENSG00000175592, ENSG00000130522, ENSG00000134954, ENSG00000074047, ENSG00000115415, ENSG00000159388, ENSG00000041982, ENSG00000137801, ENSG00000171522, ENSG00000133048, ENSG00000157227, ENSG00000154864, ENSG00000163083, ENSG00000168398, ENSG00000132170, ENSG00000160145, ENSG00000108691	2217	59	16792	2.1824	1	0.147161	0.144871
GOTERM_BP_DIRECT	GO:0060135~maternal process involved in female pregnancy	10	0.381825	0.00333509	ENSG00000168961, ENSG00000165949, ENSG00000108691, ENSG00000145730, ENSG00000137673, ENSG00000118432, ENSG00000005884, ENSG00000128335, ENSG00000046604, ENSG00000163501	2217	25	16792	3.02968	1	0.147935	0.145632
GOTERM_BP_DIRECT	GO:0006928~movement of cell or subcellular component	22	0.840015	0.00338195	ENSG00000073756, ENSG00000075624, ENSG00000099864, ENSG00000162704, ENSG00000167460, ENSG00000026025, ENSG00000170873, ENSG00000136754, ENSG00000206075, ENSG00000010278, ENSG00000168610, ENSG00000143549, ENSG00000130429, ENSG00000115091, ENSG00000120063, ENSG00000122786, ENSG00000017427, ENSG00000169429, ENSG00000184009, ENSG00000035403, ENSG00000011422, ENSG00000106211	2217	86	16792	1.93759	1	0.148832	0.146516
GOTERM_BP_DIRECT	GO:0086073~bundle of His cell-Purkinje myocyte adhesion involved in cell communication	5	0.190913	0.00363444	ENSG00000134755, ENSG00000096696, ENSG00000173801, ENSG00000057294, ENSG00000046604	2217	6	16792	6.31183	1	0.15506	0.152646
GOTERM_BP_DIRECT	GO:0097527~necroptotic signaling pathway	5	0.190913	0.00363444	ENSG00000164342, ENSG00000137275, ENSG00000232810, ENSG00000168040, ENSG00000026103	2217	6	16792	6.31183	1	0.15506	0.152646
GOTERM_BP_DIRECT	GO:0035754~B cell chemotaxis	5	0.190913	0.00363444	ENSG00000156234, ENSG00000183087, ENSG00000172817, ENSG00000171608, ENSG00000099377	2217	6	16792	6.31183	1	0.15506	0.152646
GOTERM_BP_DIRECT	GO:0007044~cell-substrate junction assembly	5	0.190913	0.00363444	ENSG00000091409, ENSG00000161638, ENSG00000259207, ENSG00000115414, ENSG00000079308	2217	6	16792	6.31183	1	0.15506	0.152646
GOTERM_BP_DIRECT	GO:0045987~positive regulation of smooth muscle contraction	9	0.343643	0.00374274	ENSG00000085733, ENSG00000073756, ENSG00000196839, ENSG00000141052, ENSG00000078401, ENSG00000127129, ENSG00000164171, ENSG00000176170, ENSG00000170214	2217	21	16792	3.24609	1	0.158471	0.156004
GOTERM_BP_DIRECT	GO:0060325~face morphogenesis	11	0.420008	0.00382807	ENSG00000119699, ENSG00000144655, ENSG00000103196, ENSG00000107679, ENSG00000198807, ENSG00000108821, ENSG00000166224, ENSG00000105329, ENSG00000126458, ENSG00000087245, ENSG00000163659	2217	30	16792	2.77721	1	0.160865	0.158361
GOTERM_BP_DIRECT	GO:0097296~activation of cysteine-type endopeptidase activity involved in apoptotic signaling pathway	7	0.267278	0.0039254	ENSG00000137275, ENSG00000121858, ENSG00000104689, ENSG00000120889, ENSG00000168040, ENSG00000026103, ENSG00000102871	2217	13	16792	4.07842	1	0.163416	0.160872
GOTERM_BP_DIRECT	GO:0007249~I-kappaB kinase/NF-kappaB signaling	17	0.649103	0.00394902	ENSG00000023445, ENSG00000129465, ENSG00000104312, ENSG00000162924, ENSG00000104856, ENSG00000110330, ENSG00000134070, ENSG00000077150, ENSG00000164342, ENSG00000137275, ENSG00000251201, ENSG00000168884, ENSG00000006062, ENSG00000232810, ENSG00000142867, ENSG00000102871, ENSG00000127666	2217	60	16792	2.14602	1	0.163416	0.160872
GOTERM_BP_DIRECT	GO:2000811~negative regulation of anoikis	8	0.30546	0.00400572	ENSG00000105388, ENSG00000161638, ENSG00000105974, ENSG00000150093, ENSG00000148053, ENSG00000148400, ENSG00000171552, ENSG00000019549	2217	17	16792	3.56433	1	0.163416	0.160872
GOTERM_BP_DIRECT	GO:0030048~actin filament-based movement	8	0.30546	0.00400572	ENSG00000128641, ENSG00000105357, ENSG00000158195, ENSG00000115935, ENSG00000157483, ENSG00000100345, ENSG00000196586, ENSG00000197535	2217	17	16792	3.56433	1	0.163416	0.160872
GOTERM_BP_DIRECT	GO:0001755~neural crest cell migration	14	0.534555	0.00429437	ENSG00000153993, ENSG00000001617, ENSG00000075223, ENSG00000138623, ENSG00000135622, ENSG00000137872, ENSG00000110880, ENSG00000143434, ENSG00000082684, ENSG00000168621, ENSG00000185033, ENSG00000115170, ENSG00000090776, ENSG00000049130	2217	45	16792	2.35642	1	0.173922	0.171215
GOTERM_BP_DIRECT	GO:0061621~canonical glycolysis	10	0.381825	0.00451179	ENSG00000170525, ENSG00000108515, ENSG00000067057, ENSG00000067225, ENSG00000111674, ENSG00000159399, ENSG00000114268, ENSG00000156515, ENSG00000102144, ENSG00000171314	2217	26	16792	2.91315	1	0.179276	0.176486
GOTERM_BP_DIRECT	GO:0048843~negative regulation of axon extension involved in axon guidance	10	0.381825	0.00451179	ENSG00000143434, ENSG00000082684, ENSG00000153993, ENSG00000001617, ENSG00000185033, ENSG00000075223, ENSG00000138623, ENSG00000130827, ENSG00000135622, ENSG00000137872	2217	26	16792	2.91315	1	0.179276	0.176486
GOTERM_BP_DIRECT	GO:0051056~regulation of small GTPase mediated signal transduction	30	1.14548	0.0045228	ENSG00000072422, ENSG00000132359, ENSG00000113319, ENSG00000213445, ENSG00000171680, ENSG00000047365, ENSG00000136895, ENSG00000197555, ENSG00000146426, ENSG00000120318, ENSG00000160293, ENSG00000134909, ENSG00000104140, ENSG00000070831, ENSG00000155366, ENSG00000146192, ENSG00000156299, ENSG00000128340, ENSG00000136002, ENSG00000173156, ENSG00000038382, ENSG00000159842, ENSG00000089639, ENSG0000…	2217	134	16792	1.69572	1	0.179276	0.176486
GOTERM_BP_DIRECT	GO:0008584~male gonad development	23	0.878198	0.00476351	ENSG00000104332, ENSG00000179059, ENSG00000106799, ENSG00000100290, ENSG00000164093, ENSG00000171552, ENSG00000044115, ENSG00000176720, ENSG00000196139, ENSG00000134698, ENSG00000157227, ENSG00000060138, ENSG00000164342, ENSG00000167034, ENSG00000121858, ENSG00000013619, ENSG00000137075, ENSG00000091831, ENSG00000049130, ENSG00000088992, ENSG00000162552, ENSG00000070404, ENSG00000122641	2217	94	16792	1.85326	1	0.187488	0.184569
GOTERM_BP_DIRECT	GO:0007507~heart development	38	1.45094	0.00498761	ENSG00000152661, ENSG00000104447, ENSG00000105877, ENSG00000074047, ENSG00000169282, ENSG00000057294, ENSG00000005884, ENSG00000118257, ENSG00000184060, ENSG00000174705, ENSG00000117298, ENSG00000132170, ENSG00000125845, ENSG00000115170, ENSG00000081189, ENSG00000185650, ENSG00000148400, ENSG00000048052, ENSG00000145730, ENSG00000154553, ENSG00000106799, ENSG00000133816, ENSG00000099139, ENSG0000…	2217	183	16792	1.57278	1	0.194935	0.191901
GOTERM_BP_DIRECT	GO:0050714~positive regulation of protein secretion	12	0.45819	0.00524517	ENSG00000119699, ENSG00000104783, ENSG00000113615, ENSG00000171560, ENSG00000105329, ENSG00000159363, ENSG00000115008, ENSG00000171564, ENSG00000087085, ENSG00000017427, ENSG00000148677, ENSG00000171557	2217	36	16792	2.52473	1	0.203392	0.200226
GOTERM_BP_DIRECT	GO:0010595~positive regulation of endothelial cell migration	14	0.534555	0.00527676	ENSG00000134954, ENSG00000117707, ENSG00000128052, ENSG00000113578, ENSG00000137801, ENSG00000138685, ENSG00000154764, ENSG00000118257, ENSG00000204217, ENSG00000138772, ENSG00000078401, ENSG00000259207, ENSG00000105287, ENSG00000050820	2217	46	16792	2.30519	1	0.203392	0.200226
GOTERM_BP_DIRECT	GO:0003334~keratinocyte development	6	0.229095	0.00564261	ENSG00000075426, ENSG00000127152, ENSG00000175793, ENSG00000136068, ENSG00000070831, ENSG00000129116	2217	10	16792	4.54452	1	0.212151	0.208849
GOTERM_BP_DIRECT	GO:0051639~actin filament network formation	6	0.229095	0.00564261	ENSG00000072110, ENSG00000162704, ENSG00000136167, ENSG00000106078, ENSG00000134775, ENSG00000102024	2217	10	16792	4.54452	1	0.212151	0.208849
GOTERM_BP_DIRECT	GO:0060411~cardiac septum morphogenesis	6	0.229095	0.00564261	ENSG00000164683, ENSG00000135679, ENSG00000148400, ENSG00000101144, ENSG00000112175, ENSG00000101384	2217	10	16792	4.54452	1	0.212151	0.208849
GOTERM_BP_DIRECT	GO:0016337~single organismal cell-cell adhesion	24	0.91638	0.00565585	ENSG00000099889, ENSG00000096696, ENSG00000065320, ENSG00000116815, ENSG00000039068, ENSG00000158683, ENSG00000028203, ENSG00000110400, ENSG00000072163, ENSG00000057294, ENSG00000173801, ENSG00000080815, ENSG00000091409, ENSG00000062038, ENSG00000055163, ENSG00000168036, ENSG00000081277, ENSG00000184363, ENSG00000102359, ENSG00000162458, ENSG00000107263, ENSG00000204539, ENSG00000090339, ENSG0000…	2217	101	16792	1.79981	1	0.212151	0.208849
GOTERM_BP_DIRECT	GO:0071901~negative regulation of protein serine/threonine kinase activity	8	0.30546	0.00581684	ENSG00000136848, ENSG00000129355, ENSG00000060237, ENSG00000185043, ENSG00000175793, ENSG00000147883, ENSG00000106211, ENSG00000170027	2217	18	16792	3.36631	1	0.213884	0.210554
GOTERM_BP_DIRECT	GO:0061436~establishment of skin barrier	8	0.30546	0.00581684	ENSG00000163472, ENSG00000189143, ENSG00000175793, ENSG00000158055, ENSG00000186832, ENSG00000144452, ENSG00000073282, ENSG00000163347	2217	18	16792	3.36631	1	0.213884	0.210554
GOTERM_BP_DIRECT	GO:0070266~necroptotic process	8	0.30546	0.00581684	ENSG00000129465, ENSG00000164342, ENSG00000137275, ENSG00000251201, ENSG00000083799, ENSG00000100504, ENSG00000127666, ENSG00000110330	2217	18	16792	3.36631	1	0.213884	0.210554
GOTERM_BP_DIRECT	GO:0002224~toll-like receptor signaling pathway	10	0.381825	0.00598772	ENSG00000163131, ENSG00000134070, ENSG00000174130, ENSG00000131323, ENSG00000172936, ENSG00000164342, ENSG00000142867, ENSG00000174125, ENSG00000162889, ENSG00000164733	2217	27	16792	2.80526	1	0.217308	0.213925
GOTERM_BP_DIRECT	GO:0055007~cardiac muscle cell differentiation	10	0.381825	0.00598772	ENSG00000142178, ENSG00000090020, ENSG00000141052, ENSG00000150093, ENSG00000125845, ENSG00000117707, ENSG00000086991, ENSG00000157168, ENSG00000275993, ENSG00000132510	2217	27	16792	2.80526	1	0.217308	0.213925
GOTERM_BP_DIRECT	GO:0014912~negative regulation of smooth muscle cell migration	7	0.267278	0.00610937	ENSG00000166333, ENSG00000173334, ENSG00000146674, ENSG00000123384, ENSG00000137872, ENSG00000106366, ENSG00000103034	2217	14	16792	3.7871	1	0.220292	0.216863
GOTERM_BP_DIRECT	GO:0045893~positive regulation of transcription, DNA-templated	89	3.39824	0.00617069	ENSG00000185507, ENSG00000180530, ENSG00000134954, ENSG00000108821, ENSG00000074047, ENSG00000213626, ENSG00000132376, ENSG00000154764, ENSG00000155974, ENSG00000140682, ENSG00000168610, ENSG00000167565, ENSG00000132170, ENSG00000125845, ENSG00000141052, ENSG00000081189, ENSG00000183770, ENSG00000153071, ENSG00000148400, ENSG00000142867, ENSG00000107175, ENSG00000162552, ENSG00000095739, ENSG0000…	2217	515	16792	1.30894	1	0.220509	0.217077
GOTERM_BP_DIRECT	GO:0006468~protein phosphorylation	80	3.0546	0.00622882	ENSG00000072786, ENSG00000177169, ENSG00000174292, ENSG00000071054, ENSG00000137825, ENSG00000263528, ENSG00000105639, ENSG00000180370, ENSG00000065534, ENSG00000110025, ENSG00000006432, ENSG00000134070, ENSG00000143479, ENSG00000171219, ENSG00000118515, ENSG00000125845, ENSG00000183496, ENSG00000106683, ENSG00000275993, ENSG00000106123, ENSG00000162434, ENSG00000095015, ENSG00000106799, ENSG0000…	2217	456	16792	1.32881	1	0.220509	0.217077
GOTERM_BP_DIRECT	GO:0010629~negative regulation of gene expression	30	1.14548	0.00626347	ENSG00000152661, ENSG00000179820, ENSG00000113739, ENSG00000147571, ENSG00000162924, ENSG00000105855, ENSG00000174775, ENSG00000177628, ENSG00000151014, ENSG00000164850, ENSG00000030110, ENSG00000081189, ENSG00000091831, ENSG00000184486, ENSG00000163823, ENSG00000162552, ENSG00000070831, ENSG00000104332, ENSG00000136826, ENSG00000109846, ENSG00000147164, ENSG00000105329, ENSG00000164938, ENSG0000…	2217	137	16792	1.65858	1	0.220509	0.217077
GOTERM_BP_DIRECT	GO:0048167~regulation of synaptic plasticity	11	0.420008	0.00641918	ENSG00000196639, ENSG00000061337, ENSG00000109756, ENSG00000137825, ENSG00000081189, ENSG00000144619, ENSG00000197555, ENSG00000123159, ENSG00000080815, ENSG00000145632, ENSG00000170027	2217	32	16792	2.60363	1	0.220509	0.217077
GOTERM_BP_DIRECT	GO:0045907~positive regulation of vasoconstriction	11	0.420008	0.00641918	ENSG00000196639, ENSG00000169403, ENSG00000073756, ENSG00000105974, ENSG00000152661, ENSG00000171560, ENSG00000180914, ENSG00000171564, ENSG00000090339, ENSG00000171557, ENSG00000170214	2217	32	16792	2.60363	1	0.220509	0.217077
GOTERM_BP_DIRECT	GO:1900026~positive regulation of substrate adhesion-dependent cell spreading	11	0.420008	0.00641918	ENSG00000169756, ENSG00000158856, ENSG00000196924, ENSG00000092929, ENSG00000179820, ENSG00000185043, ENSG00000171560, ENSG00000171564, ENSG00000070831, ENSG00000197747, ENSG00000171557	2217	32	16792	2.60363	1	0.220509	0.217077
GOTERM_BP_DIRECT	GO:0051781~positive regulation of cell division	14	0.534555	0.00643103	ENSG00000197461, ENSG00000105329, ENSG00000115008, ENSG00000113578, ENSG00000138685, ENSG00000138675, ENSG00000119630, ENSG00000119699, ENSG00000141441, ENSG00000167034, ENSG00000145431, ENSG00000100311, ENSG00000183742, ENSG00000163235	2217	47	16792	2.25614	1	0.220509	0.217077
GOTERM_BP_DIRECT	GO:0009267~cellular response to starvation	14	0.534555	0.00643103	ENSG00000104332, ENSG00000134755, ENSG00000105974, ENSG00000167196, ENSG00000177628, ENSG00000196139, ENSG00000204217, ENSG00000150907, ENSG00000165861, ENSG00000163083, ENSG00000185340, ENSG00000183087, ENSG00000162552, ENSG00000155090	2217	47	16792	2.25614	1	0.220509	0.217077
GOTERM_BP_DIRECT	GO:0050727~regulation of inflammatory response	17	0.649103	0.0065928	ENSG00000023445, ENSG00000113916, ENSG00000074416, ENSG00000073756, ENSG00000138623, ENSG00000155629, ENSG00000135046, ENSG00000159840, ENSG00000064932, ENSG00000173039, ENSG00000110330, ENSG00000172936, ENSG00000140254, ENSG00000145901, ENSG00000118503, ENSG00000091831, ENSG00000254087	2217	63	16792	2.04383	1	0.224678	0.22118
GOTERM_BP_DIRECT	GO:0032355~response to estradiol	22	0.840015	0.00679746	ENSG00000109846, ENSG00000073756, ENSG00000134954, ENSG00000108821, ENSG00000165949, ENSG00000105329, ENSG00000135046, ENSG00000157103, ENSG00000154764, ENSG00000110092, ENSG00000168610, ENSG00000168036, ENSG00000120833, ENSG00000164305, ENSG00000091831, ENSG00000109321, ENSG00000180914, ENSG00000130707, ENSG00000015475, ENSG00000145730, ENSG00000101144, ENSG00000163501	2217	91	16792	1.83113	1	0.230249	0.226665
GOTERM_BP_DIRECT	GO:0016239~positive regulation of macroautophagy	9	0.343643	0.00707873	ENSG00000177169, ENSG00000100292, ENSG00000130766, ENSG00000161011, ENSG00000162409, ENSG00000128052, ENSG00000177628, ENSG00000176171, ENSG00000168092	2217	23	16792	2.96382	1	0.236952	0.233264
GOTERM_BP_DIRECT	GO:0046718~viral entry into host cell	20	0.76365	0.00708016	ENSG00000130202, ENSG00000185803, ENSG00000161638, ENSG00000150093, ENSG00000110876, ENSG00000138448, ENSG00000072274, ENSG00000164171, ENSG00000110400, ENSG00000143324, ENSG00000082781, ENSG00000143217, ENSG00000183087, ENSG00000259207, ENSG00000185896, ENSG00000125266, ENSG00000104142, ENSG00000090339, ENSG00000164733, ENSG00000163347	2217	80	16792	1.89355	1	0.236952	0.233264
GOTERM_BP_DIRECT	GO:0043154~negative regulation of cysteine-type endopeptidase activity involved in apoptotic process	18	0.687285	0.00718888	ENSG00000105993, ENSG00000136826, ENSG00000129355, ENSG00000109846, ENSG00000135679, ENSG00000175793, ENSG00000143816, ENSG00000135596, ENSG00000196588, ENSG00000137801, ENSG00000154447, ENSG00000134259, ENSG00000170855, ENSG00000126709, ENSG00000145779, ENSG00000183087, ENSG00000127831, ENSG00000166349	2217	69	16792	1.97588	1	0.239159	0.235436
GOTERM_BP_DIRECT	GO:0030168~platelet activation	26	0.992745	0.00753208	ENSG00000102780, ENSG00000181467, ENSG00000108821, ENSG00000171560, ENSG00000065357, ENSG00000171564, ENSG00000149091, ENSG00000060558, ENSG00000160293, ENSG00000186469, ENSG00000259207, ENSG00000164930, ENSG00000072110, ENSG00000128340, ENSG00000110799, ENSG00000197943, ENSG00000171557, ENSG00000196924, ENSG00000010278, ENSG00000157680, ENSG00000183087, ENSG00000078369, ENSG00000254087, ENSG0000…	2217	115	16792	1.71243	1	0.241359	0.237602
GOTERM_BP_DIRECT	GO:0048102~autophagic cell death	5	0.190913	0.00759525	ENSG00000129355, ENSG00000164938, ENSG00000185896, ENSG00000176171, ENSG00000097033	2217	7	16792	5.41014	1	0.241359	0.237602
GOTERM_BP_DIRECT	GO:1903077~negative regulation of protein localization to plasma membrane	5	0.190913	0.00759525	ENSG00000105329, ENSG00000153071, ENSG00000117228, ENSG00000150551, ENSG00000161203	2217	7	16792	5.41014	1	0.241359	0.237602
GOTERM_BP_DIRECT	GO:0034616~response to laminar fluid shear stress	5	0.190913	0.00759525	ENSG00000119699, ENSG00000134954, ENSG00000105329, ENSG00000101665, ENSG00000165029	2217	7	16792	5.41014	1	0.241359	0.237602
GOTERM_BP_DIRECT	GO:0006897~endocytosis	30	1.14548	0.00770867	ENSG00000024422, ENSG00000178996, ENSG00000175344, ENSG00000115935, ENSG00000174791, ENSG00000115977, ENSG00000196586, ENSG00000174775, ENSG00000110047, ENSG00000099785, ENSG00000140022, ENSG00000157191, ENSG00000105290, ENSG00000187239, ENSG00000147650, ENSG00000070831, ENSG00000142192, ENSG00000139636, ENSG00000171552, ENSG00000169118, ENSG00000197959, ENSG00000011028, ENSG00000173926, ENSG0000…	2217	139	16792	1.63472	1	0.241359	0.237602
GOTERM_BP_DIRECT	GO:0030512~negative regulation of transforming growth factor beta receptor signaling pathway	17	0.649103	0.00773836	ENSG00000105971, ENSG00000106799, ENSG00000136603, ENSG00000105974, ENSG00000105329, ENSG00000198742, ENSG00000176973, ENSG00000156535, ENSG00000140682, ENSG00000119699, ENSG00000197859, ENSG00000168675, ENSG00000170801, ENSG00000100614, ENSG00000124225, ENSG00000101665, ENSG00000095739	2217	64	16792	2.0119	1	0.241359	0.237602
GOTERM_BP_DIRECT	GO:0009887~organ morphogenesis	22	0.840015	0.00773951	ENSG00000105664, ENSG00000197461, ENSG00000099204, ENSG00000104447, ENSG00000174775, ENSG00000164171, ENSG00000111450, ENSG00000138685, ENSG00000173039, ENSG00000198807, ENSG00000134250, ENSG00000120659, ENSG00000125845, ENSG00000105290, ENSG00000010030, ENSG00000145431, ENSG00000108691, ENSG00000182871, ENSG00000181649, ENSG00000125266, ENSG00000032444, ENSG00000106003	2217	92	16792	1.81122	1	0.241359	0.237602
GOTERM_BP_DIRECT	GO:0007179~transforming growth factor beta receptor signaling pathway	22	0.840015	0.00773951	ENSG00000106799, ENSG00000136603, ENSG00000130513, ENSG00000150093, ENSG00000105329, ENSG00000033170, ENSG00000198742, ENSG00000119681, ENSG00000159840, ENSG00000152894, ENSG00000119699, ENSG00000082781, ENSG00000115170, ENSG00000164404, ENSG00000089159, ENSG00000101665, ENSG00000108691, ENSG00000100311, ENSG00000095739, ENSG00000140464, ENSG00000155090, ENSG00000140564	2217	92	16792	1.81122	1	0.241359	0.237602
GOTERM_BP_DIRECT	GO:0048812~neuron projection morphogenesis	14	0.534555	0.00777712	ENSG00000136848, ENSG00000158747, ENSG00000130479, ENSG00000152661, ENSG00000130449, ENSG00000134259, ENSG00000166333, ENSG00000082397, ENSG00000085733, ENSG00000166483, ENSG00000118515, ENSG00000144460, ENSG00000101144, ENSG00000108797	2217	48	16792	2.20914	1	0.241359	0.237602
GOTERM_BP_DIRECT	GO:0035666~TRIF-dependent toll-like receptor signaling pathway	10	0.381825	0.007809	ENSG00000185507, ENSG00000023445, ENSG00000131323, ENSG00000164342, ENSG00000137275, ENSG00000251201, ENSG00000263528, ENSG00000168040, ENSG00000127666, ENSG00000110330	2217	28	16792	2.70507	1	0.241359	0.237602
GOTERM_BP_DIRECT	GO:0007018~microtubule-based movement	20	0.76365	0.00813333	ENSG00000101350, ENSG00000155980, ENSG00000140859, ENSG00000129250, ENSG00000162849, ENSG00000197102, ENSG00000174996, ENSG00000158486, ENSG00000130294, ENSG00000006125, ENSG00000134259, ENSG00000116852, ENSG00000084731, ENSG00000077380, ENSG00000137177, ENSG00000054523, ENSG00000187775, ENSG00000039139, ENSG00000126214, ENSG00000161203	2217	81	16792	1.87017	1	0.241359	0.237602
GOTERM_BP_DIRECT	GO:0043491~protein kinase B signaling	11	0.420008	0.00814186	ENSG00000166333, ENSG00000173846, ENSG00000130766, ENSG00000167034, ENSG00000183087, ENSG00000105329, ENSG00000232810, ENSG00000185650, ENSG00000166292, ENSG00000108691, ENSG00000017427	2217	33	16792	2.52473	1	0.241359	0.237602
GOTERM_BP_DIRECT	GO:0045747~positive regulation of Notch signaling pathway	11	0.420008	0.00814186	ENSG00000100060, ENSG00000168610, ENSG00000136999, ENSG00000184916, ENSG00000108219, ENSG00000115977, ENSG00000148400, ENSG00000048140, ENSG00000073282, ENSG00000106003, ENSG00000101384	2217	33	16792	2.52473	1	0.241359	0.237602
GOTERM_BP_DIRECT	GO:0010718~positive regulation of epithelial to mesenchymal transition	11	0.420008	0.00814186	ENSG00000140682, ENSG00000119699, ENSG00000106799, ENSG00000108821, ENSG00000125845, ENSG00000168036, ENSG00000105329, ENSG00000153071, ENSG00000148400, ENSG00000122694, ENSG00000095739	2217	33	16792	2.52473	1	0.241359	0.237602
GOTERM_BP_DIRECT	GO:0043536~positive regulation of blood vessel endothelial cell migration	8	0.30546	0.00817575	ENSG00000166025, ENSG00000126561, ENSG00000105329, ENSG00000137801, ENSG00000100311, ENSG00000138685, ENSG00000105287, ENSG00000106211	2217	19	16792	3.18914	1	0.241359	0.237602
GOTERM_BP_DIRECT	GO:0030220~platelet formation	8	0.30546	0.00817575	ENSG00000071127, ENSG00000072110, ENSG00000185043, ENSG00000081189, ENSG00000100345, ENSG00000164305, ENSG00000161642, ENSG00000160796	2217	19	16792	3.18914	1	0.241359	0.237602
GOTERM_BP_DIRECT	GO:0008637~apoptotic mitochondrial changes	8	0.30546	0.00817575	ENSG00000104695, ENSG00000147889, ENSG00000023909, ENSG00000001084, ENSG00000100290, ENSG00000159399, ENSG00000171552, ENSG00000015475	2217	19	16792	3.18914	1	0.241359	0.237602
GOTERM_BP_DIRECT	GO:0032455~nerve growth factor processing	4	0.15273	0.00827454	ENSG00000099139, ENSG00000140479, ENSG00000134259, ENSG00000140564	2217	4	16792	7.5742	1	0.241359	0.237602
GOTERM_BP_DIRECT	GO:1901888~regulation of cell junction assembly	4	0.15273	0.00827454	ENSG00000116473, ENSG00000109756, ENSG00000107263, ENSG00000127314	2217	4	16792	7.5742	1	0.241359	0.237602
GOTERM_BP_DIRECT	GO:2001013~epithelial cell proliferation involved in renal tubule morphogenesis	4	0.15273	0.00827454	ENSG00000205213, ENSG00000081189, ENSG00000139292, ENSG00000170873	2217	4	16792	7.5742	1	0.241359	0.237602
GOTERM_BP_DIRECT	GO:0003006~developmental process involved in reproduction	4	0.15273	0.00827454	ENSG00000184371, ENSG00000162551, ENSG00000120306, ENSG00000108819	2217	4	16792	7.5742	1	0.241359	0.237602
GOTERM_BP_DIRECT	GO:0003104~positive regulation of glomerular filtration	4	0.15273	0.00827454	ENSG00000152661, ENSG00000164251, ENSG00000183087, ENSG00000100311	2217	4	16792	7.5742	1	0.241359	0.237602
GOTERM_BP_DIRECT	GO:0030097~hemopoiesis	16	0.61092	0.00829145	ENSG00000099875, ENSG00000182809, ENSG00000068724, ENSG00000064666, ENSG00000111252, ENSG00000136634, ENSG00000020633, ENSG00000184371, ENSG00000166224, ENSG00000134250, ENSG00000124813, ENSG00000100311, ENSG00000163659, ENSG00000163565, ENSG00000163554, ENSG00000101384	2217	59	16792	2.05402	1	0.241359	0.237602
GOTERM_BP_DIRECT	GO:0051216~cartilage development	16	0.61092	0.00829145	ENSG00000069011, ENSG00000105855, ENSG00000196562, ENSG00000119042, ENSG00000115844, ENSG00000139329, ENSG00000116985, ENSG00000133048, ENSG00000112175, ENSG00000147408, ENSG00000186792, ENSG00000078401, ENSG00000183682, ENSG00000101144, ENSG00000102265, ENSG00000163501	2217	59	16792	2.05402	1	0.241359	0.237602
GOTERM_BP_DIRECT	GO:0071300~cellular response to retinoic acid	18	0.687285	0.00835523	ENSG00000136826, ENSG00000108821, ENSG00000155760, ENSG00000143816, ENSG00000198797, ENSG00000176105, ENSG00000041982, ENSG00000111186, ENSG00000247596, ENSG00000062524, ENSG00000132170, ENSG00000169981, ENSG00000081189, ENSG00000254087, ENSG00000108691, ENSG00000088992, ENSG00000143322, ENSG00000165029	2217	70	16792	1.94765	1	0.241955	0.238189
GOTERM_BP_DIRECT	GO:0048146~positive regulation of fibroblast proliferation	15	0.572738	0.00883188	ENSG00000197461, ENSG00000075426, ENSG00000182718, ENSG00000105329, ENSG00000115414, ENSG00000174405, ENSG00000197956, ENSG00000183087, ENSG00000091831, ENSG00000145431, ENSG00000100311, ENSG00000017427, ENSG00000176170, ENSG00000140464, ENSG00000124762	2217	54	16792	2.10394	1	0.25444	0.250479
GOTERM_BP_DIRECT	GO:0097202~activation of cysteine-type endopeptidase activity	6	0.229095	0.00923006	ENSG00000055163, ENSG00000030110, ENSG00000112378, ENSG00000099992, ENSG00000168040, ENSG00000163565	2217	11	16792	4.13138	1	0.25923	0.255195
GOTERM_BP_DIRECT	GO:0061045~negative regulation of wound healing	6	0.229095	0.00923006	ENSG00000152661, ENSG00000261150, ENSG00000138685, ENSG00000162552, ENSG00000106366, ENSG00000156535	2217	11	16792	4.13138	1	0.25923	0.255195
GOTERM_BP_DIRECT	GO:0001775~cell activation	6	0.229095	0.00923006	ENSG00000197461, ENSG00000150551, ENSG00000017427, ENSG00000272398, ENSG00000102265, ENSG00000085063	2217	11	16792	4.13138	1	0.25923	0.255195
GOTERM_BP_DIRECT	GO:0098911~regulation of ventricular cardiac muscle cell action potential	6	0.229095	0.00923006	ENSG00000134755, ENSG00000096696, ENSG00000105974, ENSG00000173801, ENSG00000057294, ENSG00000046604	2217	11	16792	4.13138	1	0.25923	0.255195
GOTERM_BP_DIRECT	GO:0034116~positive regulation of heterotypic cell-cell adhesion	6	0.229095	0.00923006	ENSG00000171560, ENSG00000232810, ENSG00000171564, ENSG00000101144, ENSG00000136634, ENSG00000171557	2217	11	16792	4.13138	1	0.25923	0.255195
GOTERM_BP_DIRECT	GO:0048870~cell motility	9	0.343643	0.00941127	ENSG00000085733, ENSG00000106799, ENSG00000134954, ENSG00000151914, ENSG00000102359, ENSG00000075651, ENSG00000132470, ENSG00000075618, ENSG00000157227	2217	24	16792	2.84032	1	0.260599	0.256542
GOTERM_BP_DIRECT	GO:0051149~positive regulation of muscle cell differentiation	9	0.343643	0.00941127	ENSG00000170558, ENSG00000064309, ENSG00000144857, ENSG00000008294, ENSG00000168036, ENSG00000081189, ENSG00000185386, ENSG00000044115, ENSG00000070831	2217	24	16792	2.84032	1	0.260599	0.256542
GOTERM_BP_DIRECT	GO:0007050~cell cycle arrest	30	1.14548	0.00941867	ENSG00000090097, ENSG00000162409, ENSG00000174775, ENSG00000137801, ENSG00000166333, ENSG00000117595, ENSG00000134250, ENSG00000125347, ENSG00000169429, ENSG00000140464, ENSG00000129355, ENSG00000106799, ENSG00000136603, ENSG00000116717, ENSG00000105329, ENSG00000164938, ENSG00000108819, ENSG00000198797, ENSG00000171867, ENSG00000147889, ENSG00000185340, ENSG00000100614, ENSG00000183087, ENSG0000…	2217	141	16792	1.61153	1	0.260599	0.256542
GOTERM_BP_DIRECT	GO:0071347~cellular response to interleukin-1	18	0.687285	0.00966835	ENSG00000136848, ENSG00000104332, ENSG00000136378, ENSG00000115009, ENSG00000171564, ENSG00000172216, ENSG00000133048, ENSG00000173039, ENSG00000006210, ENSG00000167034, ENSG00000186792, ENSG00000078401, ENSG00000148346, ENSG00000108691, ENSG00000102962, ENSG00000090339, ENSG00000169429, ENSG00000148677	2217	71	16792	1.92022	1	0.265028	0.260903
GOTERM_BP_DIRECT	GO:0048661~positive regulation of smooth muscle cell proliferation	16	0.61092	0.00973893	ENSG00000073756, ENSG00000100292, ENSG00000105835, ENSG00000115415, ENSG00000137801, ENSG00000164171, ENSG00000138685, ENSG00000074181, ENSG00000172936, ENSG00000198959, ENSG00000169403, ENSG00000113070, ENSG00000078401, ENSG00000232810, ENSG00000100311, ENSG00000017427	2217	60	16792	2.01979	1	0.265028	0.260903
GOTERM_BP_DIRECT	GO:0001666~response to hypoxia	35	1.33639	0.00976241	ENSG00000129521, ENSG00000134954, ENSG00000104368, ENSG00000105974, ENSG00000136856, ENSG00000175344, ENSG00000107438, ENSG00000134013, ENSG00000137801, ENSG00000164171, ENSG00000162909, ENSG00000134333, ENSG00000196839, ENSG00000125845, ENSG00000141052, ENSG00000103415, ENSG00000087245, ENSG00000086991, ENSG00000145730, ENSG00000176171, ENSG00000140464, ENSG00000109846, ENSG00000130402, ENSG0000…	2217	172	16792	1.54126	1	0.265028	0.260903
GOTERM_BP_DIRECT	GO:0043434~response to peptide hormone	13	0.496373	0.00976845	ENSG00000130522, ENSG00000113739, ENSG00000152661, ENSG00000108821, ENSG00000115415, ENSG00000159388, ENSG00000135046, ENSG00000114353, ENSG00000169047, ENSG00000109321, ENSG00000180914, ENSG00000101144, ENSG00000102265	2217	44	16792	2.23783	1	0.265028	0.260903
GOTERM_BP_DIRECT	GO:0048662~negative regulation of smooth muscle cell proliferation	10	0.381825	0.0100231	ENSG00000136826, ENSG00000166333, ENSG00000118503, ENSG00000100292, ENSG00000132170, ENSG00000173334, ENSG00000113389, ENSG00000146674, ENSG00000164136, ENSG00000103034	2217	29	16792	2.61179	1	0.270624	0.266411
GOTERM_BP_DIRECT	GO:0006605~protein targeting	12	0.45819	0.01008	ENSG00000131016, ENSG00000151320, ENSG00000152056, ENSG00000182606, ENSG00000119681, ENSG00000173156, ENSG00000123159, ENSG00000164924, ENSG00000197879, ENSG00000140464, ENSG00000051128, ENSG00000170027	2217	39	16792	2.33052	1	0.270851	0.266634
GOTERM_BP_DIRECT	GO:0009968~negative regulation of signal transduction	11	0.420008	0.0101988	ENSG00000135362, ENSG00000148908, ENSG00000196396, ENSG00000168918, ENSG00000115170, ENSG00000146674, ENSG00000089234, ENSG00000159788, ENSG00000182732, ENSG00000163501, ENSG00000154127	2217	34	16792	2.45048	1	0.272731	0.268486
GOTERM_BP_DIRECT	GO:0010976~positive regulation of neuron projection development	21	0.801833	0.0109571	ENSG00000136848, ENSG00000132932, ENSG00000109756, ENSG00000105711, ENSG00000068971, ENSG00000113657, ENSG00000148053, ENSG00000119283, ENSG00000196576, ENSG00000247596, ENSG00000118432, ENSG00000005884, ENSG00000062524, ENSG00000116473, ENSG00000171617, ENSG00000254087, ENSG00000107263, ENSG00000148677, ENSG00000143322, ENSG00000149557, ENSG00000103034	2217	89	16792	1.78717	1	0.291614	0.287075
GOTERM_BP_DIRECT	GO:0042326~negative regulation of phosphorylation	8	0.30546	0.0111693	ENSG00000129355, ENSG00000147889, ENSG00000176915, ENSG00000106070, ENSG00000147883, ENSG00000101144, ENSG00000122641, ENSG00000124762	2217	20	16792	3.02968	1	0.295855	0.29125
GOTERM_BP_DIRECT	GO:0071222~cellular response to lipopolysaccharide	25	0.954563	0.011621	ENSG00000159674, ENSG00000172216, ENSG00000136634, ENSG00000251201, ENSG00000081189, ENSG00000148346, ENSG00000130707, ENSG00000161921, ENSG00000166710, ENSG00000169429, ENSG00000127666, ENSG00000106366, ENSG00000165029, ENSG00000136848, ENSG00000187838, ENSG00000115009, ENSG00000064932, ENSG00000173039, ENSG00000189067, ENSG00000168884, ENSG00000118503, ENSG00000232810, ENSG00000108691, ENSG0000…	2217	113	16792	1.67571	1	0.306367	0.301598
GOTERM_BP_DIRECT	GO:0030307~positive regulation of cell growth	20	0.76365	0.0120695	ENSG00000104332, ENSG00000151320, ENSG00000106799, ENSG00000090020, ENSG00000068366, ENSG00000175793, ENSG00000204385, ENSG00000137845, ENSG00000157168, ENSG00000157227, ENSG00000119401, ENSG00000275896, ENSG00000113070, ENSG00000185043, ENSG00000108231, ENSG00000012232, ENSG00000070831, ENSG00000161921, ENSG00000128422, ENSG00000176170	2217	84	16792	1.80338	1	0.316697	0.311767
GOTERM_BP_DIRECT	GO:0001578~microtubule bundle formation	9	0.343643	0.0122706	ENSG00000168502, ENSG00000131711, ENSG00000130479, ENSG00000185340, ENSG00000078018, ENSG00000130779, ENSG00000074054, ENSG00000134369, ENSG00000107771	2217	25	16792	2.72671	1	0.317646	0.312701
GOTERM_BP_DIRECT	GO:0034612~response to tumor necrosis factor	9	0.343643	0.0122706	ENSG00000137275, ENSG00000073756, ENSG00000213886, ENSG00000164305, ENSG00000137845, ENSG00000141655, ENSG00000133048, ENSG00000161921, ENSG00000119401	2217	25	16792	2.72671	1	0.317646	0.312701
GOTERM_BP_DIRECT	GO:0001570~vasculogenesis	15	0.572738	0.0122762	ENSG00000105974, ENSG00000148053, ENSG00000105329, ENSG00000128052, ENSG00000166292, ENSG00000112531, ENSG00000164093, ENSG00000173706, ENSG00000136280, ENSG00000166224, ENSG00000141052, ENSG00000157483, ENSG00000185650, ENSG00000163659, ENSG00000144476	2217	56	16792	2.0288	1	0.317646	0.312701
GOTERM_BP_DIRECT	GO:0007169~transmembrane receptor protein tyrosine kinase signaling pathway	22	0.840015	0.0126224	ENSG00000095585, ENSG00000174292, ENSG00000105976, ENSG00000148053, ENSG00000128052, ENSG00000176105, ENSG00000157168, ENSG00000197965, ENSG00000170873, ENSG00000134259, ENSG00000136754, ENSG00000062524, ENSG00000184371, ENSG00000144724, ENSG00000168398, ENSG00000129946, ENSG00000254087, ENSG00000107263, ENSG00000033327, ENSG00000143322, ENSG00000162434, ENSG00000140443	2217	96	16792	1.73575	1	0.322082	0.317069
GOTERM_BP_DIRECT	GO:0048565~digestive tract development	11	0.420008	0.0126279	ENSG00000119699, ENSG00000091409, ENSG00000141052, ENSG00000205213, ENSG00000104447, ENSG00000105329, ENSG00000166341, ENSG00000132470, ENSG00000180914, ENSG00000145431, ENSG00000106078	2217	35	16792	2.38046	1	0.322082	0.317069
GOTERM_BP_DIRECT	GO:0006865~amino acid transport	11	0.420008	0.0126279	ENSG00000131389, ENSG00000155465, ENSG00000103064, ENSG00000119899, ENSG00000092068, ENSG00000017483, ENSG00000163817, ENSG00000123643, ENSG00000139209, ENSG00000167703, ENSG00000268104	2217	35	16792	2.38046	1	0.322082	0.317069
GOTERM_BP_DIRECT	GO:0032480~negative regulation of type I interferon production	10	0.381825	0.0126781	ENSG00000131323, ENSG00000156587, ENSG00000187608, ENSG00000118503, ENSG00000083799, ENSG00000263528, ENSG00000138646, ENSG00000140853, ENSG00000107201, ENSG00000115267	2217	30	16792	2.52473	1	0.322082	0.317069
GOTERM_BP_DIRECT	GO:0061028~establishment of endothelial barrier	7	0.267278	0.012901	ENSG00000116473, ENSG00000109756, ENSG00000179820, ENSG00000164251, ENSG00000107263, ENSG00000090339, ENSG00000127314	2217	16	16792	3.31371	1	0.323335	0.318302
GOTERM_BP_DIRECT	GO:0048566~embryonic digestive tract development	7	0.267278	0.012901	ENSG00000196839, ENSG00000070031, ENSG00000099139, ENSG00000074047, ENSG00000232810, ENSG00000106571, ENSG00000169429	2217	16	16792	3.31371	1	0.323335	0.318302
GOTERM_BP_DIRECT	GO:0046328~regulation of JNK cascade	7	0.267278	0.012901	ENSG00000071054, ENSG00000164251, ENSG00000164418, ENSG00000125249, ENSG00000121653, ENSG00000154447, ENSG00000140443	2217	16	16792	3.31371	1	0.323335	0.318302
GOTERM_BP_DIRECT	GO:0043497~regulation of protein heterodimerization activity	5	0.190913	0.0136132	ENSG00000136848, ENSG00000064309, ENSG00000030110, ENSG00000157168, ENSG00000070831	2217	8	16792	4.73387	1	0.335173	0.329956
GOTERM_BP_DIRECT	GO:0060993~kidney morphogenesis	5	0.190913	0.0136132	ENSG00000162738, ENSG00000176928, ENSG00000187210, ENSG00000124766, ENSG00000183943	2217	8	16792	4.73387	1	0.335173	0.329956
GOTERM_BP_DIRECT	GO:1904706~negative regulation of vascular smooth muscle cell proliferation	5	0.190913	0.0136132	ENSG00000119699, ENSG00000164850, ENSG00000100292, ENSG00000130176, ENSG00000136634	2217	8	16792	4.73387	1	0.335173	0.329956
GOTERM_BP_DIRECT	GO:0002467~germinal center formation	5	0.190913	0.0136132	ENSG00000077150, ENSG00000113916, ENSG00000156234, ENSG00000092929, ENSG00000081189	2217	8	16792	4.73387	1	0.335173	0.329956
GOTERM_BP_DIRECT	GO:0043408~regulation of MAPK cascade	12	0.45819	0.0148363	ENSG00000119699, ENSG00000163083, ENSG00000130513, ENSG00000168487, ENSG00000183682, ENSG00000164404, ENSG00000028116, ENSG00000116985, ENSG00000112175, ENSG00000272398, ENSG00000056291, ENSG00000122641	2217	41	16792	2.21684	1	0.362096	0.35646
GOTERM_BP_DIRECT	GO:0000045~autophagosome assembly	12	0.45819	0.0148363	ENSG00000101460, ENSG00000139112, ENSG00000181652, ENSG00000101844, ENSG00000164938, ENSG00000070540, ENSG00000175224, ENSG00000140941, ENSG00000123395, ENSG00000080815, ENSG00000198925, ENSG00000078804	2217	41	16792	2.21684	1	0.362096	0.35646
GOTERM_BP_DIRECT	GO:0072659~protein localization to plasma membrane	16	0.61092	0.0152998	ENSG00000024422, ENSG00000109756, ENSG00000155265, ENSG00000039068, ENSG00000137501, ENSG00000197535, ENSG00000167874, ENSG00000196924, ENSG00000082397, ENSG00000084733, ENSG00000166257, ENSG00000166341, ENSG00000232810, ENSG00000144452, ENSG00000125249, ENSG00000167535	2217	63	16792	1.92361	1	0.370176	0.364413
GOTERM_BP_DIRECT	GO:0009611~response to wounding	16	0.61092	0.0152998	ENSG00000197461, ENSG00000196562, ENSG00000110799, ENSG00000105329, ENSG00000132470, ENSG00000041982, ENSG00000115414, ENSG00000102934, ENSG00000185650, ENSG00000151914, ENSG00000140526, ENSG00000108691, ENSG00000163823, ENSG00000100311, ENSG00000087085, ENSG00000164687	2217	63	16792	1.92361	1	0.370176	0.364413
GOTERM_BP_DIRECT	GO:0008283~cell proliferation	64	2.44368	0.0155083	ENSG00000112249, ENSG00000074047, ENSG00000103855, ENSG00000113578, ENSG00000120708, ENSG00000174775, ENSG00000164171, ENSG00000138675, ENSG00000170214, ENSG00000168610, ENSG00000134470, ENSG00000030110, ENSG00000125726, ENSG00000153071, ENSG00000087085, ENSG00000123384, ENSG00000163565, ENSG00000155090, ENSG00000101670, ENSG00000140564, ENSG00000169031, ENSG00000176720, ENSG00000171552, ENSG0000…	2217	366	16792	1.32445	1	0.373604	0.367788
GOTERM_BP_DIRECT	GO:0019886~antigen processing and presentation of exogenous peptide antigen via MHC class II	21	0.801833	0.0156903	ENSG00000101350, ENSG00000106367, ENSG00000152056, ENSG00000113615, ENSG00000155980, ENSG00000196188, ENSG00000241106, ENSG00000197102, ENSG00000174996, ENSG00000138107, ENSG00000175203, ENSG00000138674, ENSG00000006125, ENSG00000173898, ENSG00000163131, ENSG00000084731, ENSG00000077380, ENSG00000100934, ENSG00000166847, ENSG00000126214, ENSG00000161203	2217	92	16792	1.72889	1	0.376366	0.370507
GOTERM_BP_DIRECT	GO:0032760~positive regulation of tumor necrosis factor production	13	0.496373	0.016658	ENSG00000110944, ENSG00000104312, ENSG00000172575, ENSG00000159674, ENSG00000168040, ENSG00000204592, ENSG00000172936, ENSG00000164342, ENSG00000169403, ENSG00000137275, ENSG00000108691, ENSG00000127666, ENSG00000181722	2217	47	16792	2.09499	1	0.392834	0.386719
GOTERM_BP_DIRECT	GO:0032956~regulation of actin cytoskeleton organization	13	0.496373	0.016658	ENSG00000158856, ENSG00000197461, ENSG00000130303, ENSG00000162738, ENSG00000075275, ENSG00000176749, ENSG00000247596, ENSG00000166333, ENSG00000158055, ENSG00000142669, ENSG00000075618, ENSG00000123384, ENSG00000145730	2217	47	16792	2.09499	1	0.392834	0.386719
GOTERM_BP_DIRECT	GO:0031100~organ regeneration	13	0.496373	0.016658	ENSG00000067225, ENSG00000136167, ENSG00000136881, ENSG00000119630, ENSG00000166741, ENSG00000138772, ENSG00000132170, ENSG00000030110, ENSG00000183087, ENSG00000148400, ENSG00000108691, ENSG00000197081, ENSG00000124762	2217	47	16792	2.09499	1	0.392834	0.386719
GOTERM_BP_DIRECT	GO:0043647~inositol phosphate metabolic process	13	0.496373	0.016658	ENSG00000161714, ENSG00000137825, ENSG00000168918, ENSG00000151689, ENSG00000173598, ENSG00000187091, ENSG00000196368, ENSG00000197943, ENSG00000040933, ENSG00000086544, ENSG00000109452, ENSG00000101333, ENSG00000161896	2217	47	16792	2.09499	1	0.392834	0.386719
GOTERM_BP_DIRECT	GO:0032436~positive regulation of proteasomal ubiquitin-dependent protein catabolic process	16	0.61092	0.0176145	ENSG00000135924, ENSG00000135679, ENSG00000146373, ENSG00000173334, ENSG00000167196, ENSG00000116514, ENSG00000080815, ENSG00000001084, ENSG00000145506, ENSG00000137393, ENSG00000153071, ENSG00000013561, ENSG00000101665, ENSG00000072609, ENSG00000034677, ENSG00000145632	2217	64	16792	1.89355	1	0.405313	0.399004
GOTERM_BP_DIRECT	GO:0006469~negative regulation of protein kinase activity	22	0.840015	0.0176877	ENSG00000128594, ENSG00000107338, ENSG00000116717, ENSG00000175793, ENSG00000173334, ENSG00000180370, ENSG00000099860, ENSG00000132376, ENSG00000170677, ENSG00000170027, ENSG00000185070, ENSG00000154127, ENSG00000166333, ENSG00000148948, ENSG00000079385, ENSG00000147889, ENSG00000120833, ENSG00000188993, ENSG00000162545, ENSG00000088992, ENSG00000184557, ENSG00000106211	2217	99	16792	1.68316	1	0.405313	0.399004
GOTERM_BP_DIRECT	GO:0001764~neuron migration	23	0.878198	0.0177135	ENSG00000150471, ENSG00000152661, ENSG00000109756, ENSG00000065320, ENSG00000148053, ENSG00000119042, ENSG00000196588, ENSG00000164093, ENSG00000075275, ENSG00000176749, ENSG00000134369, ENSG00000152377, ENSG00000080815, ENSG00000005884, ENSG00000137285, ENSG00000116141, ENSG00000168036, ENSG00000081189, ENSG00000183087, ENSG00000133083, ENSG00000165606, ENSG00000166579, ENSG00000163697	2217	105	16792	1.65911	1	0.405313	0.399004
GOTERM_BP_DIRECT	GO:0032331~negative regulation of chondrocyte differentiation	7	0.267278	0.017753	ENSG00000106799, ENSG00000168036, ENSG00000074047, ENSG00000136378, ENSG00000143816, ENSG00000087494, ENSG00000019549	2217	17	16792	3.11879	1	0.405313	0.399004
GOTERM_BP_DIRECT	GO:0060749~mammary gland alveolus development	7	0.267278	0.017753	ENSG00000110092, ENSG00000113494, ENSG00000120659, ENSG00000091831, ENSG00000109321, ENSG00000141655, ENSG00000163235	2217	17	16792	3.11879	1	0.405313	0.399004
GOTERM_BP_DIRECT	GO:0048535~lymph node development	7	0.267278	0.017753	ENSG00000129465, ENSG00000156234, ENSG00000105329, ENSG00000227507, ENSG00000168040, ENSG00000164136, ENSG00000141655	2217	17	16792	3.11879	1	0.405313	0.399004
GOTERM_BP_DIRECT	GO:0045740~positive regulation of DNA replication	12	0.45819	0.0177674	ENSG00000119699, ENSG00000197461, ENSG00000074047, ENSG00000174775, ENSG00000109321, ENSG00000109079, ENSG00000145431, ENSG00000049130, ENSG00000100311, ENSG00000070831, ENSG00000017427, ENSG00000140443	2217	42	16792	2.16406	1	0.405313	0.399004
GOTERM_BP_DIRECT	GO:0090002~establishment of protein localization to plasma membrane	12	0.45819	0.0177674	ENSG00000170558, ENSG00000084710, ENSG00000108219, ENSG00000184363, ENSG00000232810, ENSG00000039068, ENSG00000048140, ENSG00000068724, ENSG00000162552, ENSG00000173801, ENSG00000057294, ENSG00000197747	2217	42	16792	2.16406	1	0.405313	0.399004
GOTERM_BP_DIRECT	GO:0033157~regulation of intracellular protein transport	4	0.15273	0.0186562	ENSG00000196396, ENSG00000159363, ENSG00000136167, ENSG00000166579	2217	5	16792	6.05936	1	0.418753	0.412234
GOTERM_BP_DIRECT	GO:0002934~desmosome organization	4	0.15273	0.0186562	ENSG00000096696, ENSG00000112378, ENSG00000110400, ENSG00000046604	2217	5	16792	6.05936	1	0.418753	0.412234
GOTERM_BP_DIRECT	GO:0071681~cellular response to indole-3-methanol	4	0.15273	0.0186562	ENSG00000168036, ENSG00000039068, ENSG00000044115, ENSG00000173801	2217	5	16792	6.05936	1	0.418753	0.412234
GOTERM_BP_DIRECT	GO:0009597~detection of virus	4	0.15273	0.0186562	ENSG00000164342, ENSG00000132824, ENSG00000107201, ENSG00000115267	2217	5	16792	6.05936	1	0.418753	0.412234
GOTERM_BP_DIRECT	GO:0034605~cellular response to heat	11	0.420008	0.018755	ENSG00000131620, ENSG00000111728, ENSG00000100292, ENSG00000176907, ENSG00000115008, ENSG00000113578, ENSG00000254087, ENSG00000138119, ENSG00000137801, ENSG00000066427, ENSG00000124762	2217	37	16792	2.25179	1	0.419286	0.412759
GOTERM_BP_DIRECT	GO:0006906~vesicle fusion	15	0.572738	0.0192908	ENSG00000105971, ENSG00000135636, ENSG00000135823, ENSG00000106636, ENSG00000110975, ENSG00000137501, ENSG00000198535, ENSG00000067715, ENSG00000173227, ENSG00000143469, ENSG00000205502, ENSG00000132718, ENSG00000272636, ENSG00000168899, ENSG00000019505	2217	59	16792	1.92564	1	0.429548	0.422861
GOTERM_BP_DIRECT	GO:0008037~cell recognition	8	0.30546	0.0193965	ENSG00000038427, ENSG00000130202, ENSG00000147408, ENSG00000143217, ENSG00000105767, ENSG00000106714, ENSG00000172243, ENSG00000110400	2217	22	16792	2.75425	1	0.430154	0.423458
GOTERM_BP_DIRECT	GO:0046677~response to antibiotic	10	0.381825	0.0195012	ENSG00000104695, ENSG00000135679, ENSG00000134954, ENSG00000136603, ENSG00000162551, ENSG00000186792, ENSG00000164305, ENSG00000108691, ENSG00000065615, ENSG00000162434	2217	32	16792	2.36694	1	0.430154	0.423458
GOTERM_BP_DIRECT	GO:0014065~phosphatidylinositol 3-kinase signaling	9	0.343643	0.0198164	ENSG00000062524, ENSG00000107679, ENSG00000169047, ENSG00000078401, ENSG00000185650, ENSG00000171608, ENSG00000144460, ENSG00000017427, ENSG00000140443	2217	27	16792	2.52473	1	0.430154	0.423458
GOTERM_BP_DIRECT	GO:0031032~actomyosin structure organization	9	0.343643	0.0198164	ENSG00000082397, ENSG00000171877, ENSG00000105357, ENSG00000139926, ENSG00000117519, ENSG00000198752, ENSG00000100345, ENSG00000064666, ENSG00000130176	2217	27	16792	2.52473	1	0.430154	0.423458
GOTERM_BP_DIRECT	GO:0042476~odontogenesis	9	0.343643	0.0198164	ENSG00000119699, ENSG00000198807, ENSG00000135925, ENSG00000091136, ENSG00000164093, ENSG00000197535, ENSG00000145730, ENSG00000122641, ENSG00000143367	2217	27	16792	2.52473	1	0.430154	0.423458
GOTERM_BP_DIRECT	GO:0032728~positive regulation of interferon-beta production	9	0.343643	0.0198164	ENSG00000185507, ENSG00000164342, ENSG00000142166, ENSG00000104312, ENSG00000125347, ENSG00000128604, ENSG00000107201, ENSG00000115267, ENSG00000181722	2217	27	16792	2.52473	1	0.430154	0.423458
GOTERM_BP_DIRECT	GO:0001701~in utero embryonic development	36	1.37457	0.0198568	ENSG00000147050, ENSG00000152661, ENSG00000184916, ENSG00000074047, ENSG00000166292, ENSG00000164093, ENSG00000137845, ENSG00000132376, ENSG00000170921, ENSG00000125845, ENSG00000168036, ENSG00000115170, ENSG00000100345, ENSG00000148400, ENSG00000011132, ENSG00000108861, ENSG00000175592, ENSG00000106799, ENSG00000150093, ENSG00000033170, ENSG00000170385, ENSG00000171552, ENSG00000174405, ENSG0000…	2217	187	16792	1.45813	1	0.430154	0.423458
GOTERM_BP_DIRECT	GO:0007398~ectoderm development	6	0.229095	0.0204993	ENSG00000168036, ENSG00000158055, ENSG00000160685, ENSG00000198742, ENSG00000185479, ENSG00000111450	2217	13	16792	3.49578	1	0.432342	0.425612
GOTERM_BP_DIRECT	GO:0097284~hepatocyte apoptotic process	6	0.229095	0.0204993	ENSG00000111057, ENSG00000026103, ENSG00000171552, ENSG00000015475, ENSG00000170421, ENSG00000148180	2217	13	16792	3.49578	1	0.432342	0.425612
GOTERM_BP_DIRECT	GO:0070306~lens fiber cell differentiation	6	0.229095	0.0204993	ENSG00000136603, ENSG00000105325, ENSG00000178573, ENSG00000105329, ENSG00000196116, ENSG00000117139	2217	13	16792	3.49578	1	0.432342	0.425612
GOTERM_BP_DIRECT	GO:0051693~actin filament capping	6	0.229095	0.0204993	ENSG00000158856, ENSG00000197694, ENSG00000163554, ENSG00000127831, ENSG00000148180, ENSG00000173898	2217	13	16792	3.49578	1	0.432342	0.425612
GOTERM_BP_DIRECT	GO:1900025~negative regulation of substrate adhesion-dependent cell spreading	6	0.229095	0.0204993	ENSG00000184292, ENSG00000158856, ENSG00000130402, ENSG00000163975, ENSG00000117228, ENSG00000110880	2217	13	16792	3.49578	1	0.432342	0.425612
GOTERM_BP_DIRECT	GO:0050806~positive regulation of synaptic transmission	6	0.229095	0.0204993	ENSG00000171603, ENSG00000108231, ENSG00000108691, ENSG00000164418, ENSG00000158258, ENSG00000067715	2217	13	16792	3.49578	1	0.432342	0.425612
GOTERM_BP_DIRECT	GO:0051145~smooth muscle cell differentiation	6	0.229095	0.0204993	ENSG00000141052, ENSG00000168036, ENSG00000081189, ENSG00000115170, ENSG00000196588, ENSG00000162552	2217	13	16792	3.49578	1	0.432342	0.425612
GOTERM_BP_DIRECT	GO:0090136~epithelial cell-cell adhesion	5	0.190913	0.021973	ENSG00000082781, ENSG00000140859, ENSG00000044115, ENSG00000070831, ENSG00000035403	2217	9	16792	4.20789	1	0.453162	0.446108
GOTERM_BP_DIRECT	GO:0002480~antigen processing and presentation of exogenous peptide antigen via MHC class I, TAP-independent	5	0.190913	0.021973	ENSG00000204525, ENSG00000204642, ENSG00000234745, ENSG00000166710, ENSG00000204592	2217	9	16792	4.20789	1	0.453162	0.446108
GOTERM_BP_DIRECT	GO:0034144~negative regulation of toll-like receptor 4 signaling pathway	5	0.190913	0.021973	ENSG00000136848, ENSG00000276600, ENSG00000251201, ENSG00000118503, ENSG00000254087	2217	9	16792	4.20789	1	0.453162	0.446108
GOTERM_BP_DIRECT	GO:0032836~glomerular basement membrane development	5	0.190913	0.021973	ENSG00000196562, ENSG00000157483, ENSG00000169031, ENSG00000081052, ENSG00000116962	2217	9	16792	4.20789	1	0.453162	0.446108
GOTERM_BP_DIRECT	GO:0048103~somatic stem cell division	5	0.190913	0.021973	ENSG00000147889, ENSG00000155760, ENSG00000162738, ENSG00000148400, ENSG00000154764	2217	9	16792	4.20789	1	0.453162	0.446108
GOTERM_BP_DIRECT	GO:0035456~response to interferon-beta	5	0.190913	0.021973	ENSG00000130303, ENSG00000263528, ENSG00000159110, ENSG00000115415, ENSG00000185885	2217	9	16792	4.20789	1	0.453162	0.446108
GOTERM_BP_DIRECT	GO:0001568~blood vessel development	11	0.420008	0.0225273	ENSG00000079385, ENSG00000150907, ENSG00000135679, ENSG00000108821, ENSG00000109756, ENSG00000130635, ENSG00000081189, ENSG00000138448, ENSG00000107263, ENSG00000080815, ENSG00000176170	2217	38	16792	2.19253	1	0.462885	0.45568
GOTERM_BP_DIRECT	GO:0045216~cell-cell junction organization	7	0.267278	0.0237211	ENSG00000119699, ENSG00000136280, ENSG00000105329, ENSG00000140832, ENSG00000184697, ENSG00000072163, ENSG00000163347	2217	18	16792	2.94552	1	0.475987	0.468578
GOTERM_BP_DIRECT	GO:0035904~aorta development	7	0.267278	0.0237211	ENSG00000049323, ENSG00000113083, ENSG00000166847, ENSG00000057657, ENSG00000006125, ENSG00000129038, ENSG00000070614	2217	18	16792	2.94552	1	0.475987	0.468578
GOTERM_BP_DIRECT	GO:0007413~axonal fasciculation	7	0.267278	0.0237211	ENSG00000153266, ENSG00000133216, ENSG00000144619, ENSG00000095713, ENSG00000176749, ENSG00000118432, ENSG00000115310	2217	18	16792	2.94552	1	0.475987	0.468578
GOTERM_BP_DIRECT	GO:0033280~response to vitamin D	7	0.267278	0.0237211	ENSG00000129355, ENSG00000019186, ENSG00000073756, ENSG00000113739, ENSG00000162551, ENSG00000105329, ENSG00000101144	2217	18	16792	2.94552	1	0.475987	0.468578
GOTERM_BP_DIRECT	GO:0007250~activation of NF-kappaB-inducing kinase activity	7	0.267278	0.0237211	ENSG00000174130, ENSG00000164342, ENSG00000172175, ENSG00000104689, ENSG00000120889, ENSG00000133048, ENSG00000100065	2217	18	16792	2.94552	1	0.475987	0.468578
GOTERM_BP_DIRECT	GO:0051402~neuron apoptotic process	10	0.381825	0.023761	ENSG00000146072, ENSG00000142192, ENSG00000164418, ENSG00000171552, ENSG00000176720, ENSG00000015475, ENSG00000176171, ENSG00000174405, ENSG00000080815, ENSG00000073282	2217	33	16792	2.29521	1	0.475987	0.468578
GOTERM_BP_DIRECT	GO:0070555~response to interleukin-1	10	0.381825	0.023761	ENSG00000134070, ENSG00000172936, ENSG00000168961, ENSG00000104312, ENSG00000134954, ENSG00000001084, ENSG00000135046, ENSG00000141655, ENSG00000133048, ENSG00000173039	2217	33	16792	2.29521	1	0.475987	0.468578
GOTERM_BP_DIRECT	GO:0071456~cellular response to hypoxia	21	0.801833	0.0243349	ENSG00000104332, ENSG00000073756, ENSG00000090020, ENSG00000160789, ENSG00000135679, ENSG00000113739, ENSG00000100292, ENSG00000078237, ENSG00000197930, ENSG00000104419, ENSG00000137449, ENSG00000167034, ENSG00000185650, ENSG00000078401, ENSG00000078369, ENSG00000101144, ENSG00000149428, ENSG00000090339, ENSG00000176171, ENSG00000141279, ENSG00000148677	2217	96	16792	1.65686	1	0.485743	0.478181
GOTERM_BP_DIRECT	GO:0090200~positive regulation of release of cytochrome c from mitochondria	9	0.343643	0.0246194	ENSG00000164850, ENSG00000030110, ENSG00000213190, ENSG00000121858, ENSG00000100290, ENSG00000104081, ENSG00000015475, ENSG00000176171, ENSG00000011422	2217	28	16792	2.43456	1	0.487769	0.480176
GOTERM_BP_DIRECT	GO:0007420~brain development	36	1.37457	0.024762	ENSG00000130479, ENSG00000176597, ENSG00000144619, ENSG00000099246, ENSG00000026103, ENSG00000134198, ENSG00000067715, ENSG00000169282, ENSG00000136535, ENSG00000168092, ENSG00000204217, ENSG00000170525, ENSG00000144724, ENSG00000187498, ENSG00000030110, ENSG00000015475, ENSG00000162433, ENSG00000176170, ENSG00000103034, ENSG00000132688, ENSG00000070031, ENSG00000156574, ENSG00000117707, ENSG0000…	2217	190	16792	1.43511	1	0.487769	0.480176
GOTERM_BP_DIRECT	GO:0033137~negative regulation of peptidyl-serine phosphorylation	8	0.30546	0.0247855	ENSG00000158856, ENSG00000105974, ENSG00000168398, ENSG00000030110, ENSG00000101665, ENSG00000163291, ENSG00000132376, ENSG00000101265	2217	23	16792	2.6345	1	0.487769	0.480176
GOTERM_BP_DIRECT	GO:0051966~regulation of synaptic transmission, glutamatergic	8	0.30546	0.0247855	ENSG00000081189, ENSG00000157680, ENSG00000160145, ENSG00000135919, ENSG00000168959, ENSG00000067715, ENSG00000080815, ENSG00000118432	2217	23	16792	2.6345	1	0.487769	0.480176
GOTERM_BP_DIRECT	GO:0016192~vesicle-mediated transport	30	1.14548	0.0251596	ENSG00000105355, ENSG00000106367, ENSG00000108669, ENSG00000123240, ENSG00000111711, ENSG00000137501, ENSG00000197535, ENSG00000111450, ENSG00000084733, ENSG00000120318, ENSG00000145817, ENSG00000187239, ENSG00000106089, ENSG00000167306, ENSG00000104142, ENSG00000122674, ENSG00000168899, ENSG00000161203, ENSG00000213064, ENSG00000152056, ENSG00000155980, ENSG00000106636, ENSG00000138107, ENSG0000…	2217	152	16792	1.49491	1	0.493393	0.485713
GOTERM_BP_DIRECT	GO:0000165~MAPK cascade	47	1.79458	0.0254341	ENSG00000105974, ENSG00000109756, ENSG00000113319, ENSG00000197694, ENSG00000175166, ENSG00000113578, ENSG00000172575, ENSG00000069956, ENSG00000174775, ENSG00000105639, ENSG00000152689, ENSG00000138675, ENSG00000240065, ENSG00000251322, ENSG00000113070, ENSG00000169047, ENSG00000081189, ENSG00000185650, ENSG00000129946, ENSG00000162734, ENSG00000162434, ENSG00000070614, ENSG00000136848, ENSG0000…	2217	262	16792	1.35873	1	0.497003	0.489266
GOTERM_BP_DIRECT	GO:0007596~blood coagulation	35	1.33639	0.0255215	ENSG00000024422, ENSG00000104368, ENSG00000108821, ENSG00000171560, ENSG00000171564, ENSG00000110047, ENSG00000164171, ENSG00000111252, ENSG00000188488, ENSG00000164251, ENSG00000278828, ENSG00000125347, ENSG00000135919, ENSG00000145431, ENSG00000259207, ENSG00000070831, ENSG00000204936, ENSG00000099937, ENSG00000101076, ENSG00000085063, ENSG00000013016, ENSG00000110799, ENSG00000197249, ENSG0000…	2217	184	16792	1.44074	1	0.497003	0.489266
GOTERM_BP_DIRECT	GO:0051291~protein heterooligomerization	16	0.61092	0.0261742	ENSG00000023445, ENSG00000129465, ENSG00000146197, ENSG00000174775, ENSG00000168040, ENSG00000138758, ENSG00000044115, ENSG00000173801, ENSG00000110330, ENSG00000169756, ENSG00000166333, ENSG00000137275, ENSG00000161011, ENSG00000142867, ENSG00000102871, ENSG00000163347	2217	67	16792	1.80876	1	0.506186	0.498307
GOTERM_BP_DIRECT	GO:0006952~defense response	16	0.61092	0.0261742	ENSG00000104783, ENSG00000172175, ENSG00000168394, ENSG00000008517, ENSG00000170677, ENSG00000150048, ENSG00000157601, ENSG00000277117, ENSG00000006210, ENSG00000145901, ENSG00000163083, ENSG00000206337, ENSG00000234745, ENSG00000160223, ENSG00000183486, ENSG00000122641	2217	67	16792	1.80876	1	0.506186	0.498307
GOTERM_BP_DIRECT	GO:0010506~regulation of autophagy	13	0.496373	0.0266874	ENSG00000177169, ENSG00000166908, ENSG00000164938, ENSG00000136048, ENSG00000176720, ENSG00000197746, ENSG00000168502, ENSG00000150867, ENSG00000163565, ENSG00000255330, ENSG00000143322, ENSG00000167657, ENSG00000106211	2217	50	16792	1.96929	1	0.509843	0.501906
GOTERM_BP_DIRECT	GO:0008219~cell death	11	0.420008	0.0268194	ENSG00000075426, ENSG00000123240, ENSG00000100292, ENSG00000100647, ENSG00000147509, ENSG00000142867, ENSG00000109099, ENSG00000142227, ENSG00000176171, ENSG00000105287, ENSG00000134531	2217	39	16792	2.13631	1	0.509843	0.501906
GOTERM_BP_DIRECT	GO:0048791~calcium ion-regulated exocytosis of neurotransmitter	11	0.420008	0.0268194	ENSG00000143469, ENSG00000205502, ENSG00000110975, ENSG00000132718, ENSG00000137501, ENSG00000272636, ENSG00000198535, ENSG00000067715, ENSG00000019505, ENSG00000117016, ENSG00000173227	2217	39	16792	2.13631	1	0.509843	0.501906
GOTERM_BP_DIRECT	GO:0030890~positive regulation of B cell proliferation	11	0.420008	0.0268194	ENSG00000101096, ENSG00000113916, ENSG00000198286, ENSG00000196839, ENSG00000081189, ENSG00000072274, ENSG00000169508, ENSG00000175505, ENSG00000127666, ENSG00000197329, ENSG00000124762	2217	39	16792	2.13631	1	0.509843	0.501906
GOTERM_BP_DIRECT	GO:0032570~response to progesterone	11	0.420008	0.0268194	ENSG00000119699, ENSG00000175592, ENSG00000189143, ENSG00000105974, ENSG00000105329, ENSG00000140526, ENSG00000180914, ENSG00000108691, ENSG00000137801, ENSG00000173039, ENSG00000046604	2217	39	16792	2.13631	1	0.509843	0.501906
GOTERM_BP_DIRECT	GO:0030889~negative regulation of B cell proliferation	6	0.229095	0.0284937	ENSG00000147889, ENSG00000146072, ENSG00000168918, ENSG00000254087, ENSG00000057657, ENSG00000136634	2217	14	16792	3.24609	1	0.534401	0.526082
GOTERM_BP_DIRECT	GO:0048009~insulin-like growth factor receptor signaling pathway	6	0.229095	0.0284937	ENSG00000150938, ENSG00000106070, ENSG00000169047, ENSG00000017427, ENSG00000197081, ENSG00000140443	2217	14	16792	3.24609	1	0.534401	0.526082
GOTERM_BP_DIRECT	GO:0035729~cellular response to hepatocyte growth factor stimulus	6	0.229095	0.0284937	ENSG00000023909, ENSG00000001084, ENSG00000136634, ENSG00000127831, ENSG00000173039, ENSG00000050820	2217	14	16792	3.24609	1	0.534401	0.526082
GOTERM_BP_DIRECT	GO:0010812~negative regulation of cell-substrate adhesion	6	0.229095	0.0284937	ENSG00000158856, ENSG00000108821, ENSG00000155760, ENSG00000148400, ENSG00000152377, ENSG00000100097	2217	14	16792	3.24609	1	0.534401	0.526082
GOTERM_BP_DIRECT	GO:0001837~epithelial to mesenchymal transition	10	0.381825	0.0286434	ENSG00000169756, ENSG00000106799, ENSG00000125845, ENSG00000168036, ENSG00000105329, ENSG00000148400, ENSG00000134013, ENSG00000162552, ENSG00000101144, ENSG00000019549	2217	34	16792	2.22771	1	0.535412	0.527078
GOTERM_BP_DIRECT	GO:0006977~DNA damage response, signal transduction by p53 class mediator resulting in cell cycle arrest	15	0.572738	0.0289773	ENSG00000090097, ENSG00000135679, ENSG00000116717, ENSG00000175793, ENSG00000159388, ENSG00000155508, ENSG00000170855, ENSG00000173846, ENSG00000149115, ENSG00000161642, ENSG00000132819, ENSG00000124766, ENSG00000140464, ENSG00000124762, ENSG00000145632	2217	62	16792	1.83247	1	0.536272	0.527925
GOTERM_BP_DIRECT	GO:0007613~memory	15	0.572738	0.0289773	ENSG00000161638, ENSG00000073756, ENSG00000175344, ENSG00000174791, ENSG00000157045, ENSG00000172216, ENSG00000080815, ENSG00000118432, ENSG00000005884, ENSG00000196639, ENSG00000251322, ENSG00000160145, ENSG00000180914, ENSG00000147852, ENSG00000145632	2217	62	16792	1.83247	1	0.536272	0.527925
GOTERM_BP_DIRECT	GO:0060395~SMAD protein signal transduction	15	0.572738	0.0289773	ENSG00000156574, ENSG00000130513, ENSG00000105329, ENSG00000026025, ENSG00000116985, ENSG00000112175, ENSG00000119699, ENSG00000163083, ENSG00000168487, ENSG00000125845, ENSG00000183682, ENSG00000164404, ENSG00000101144, ENSG00000101076, ENSG00000122641	2217	62	16792	1.83247	1	0.536272	0.527925
GOTERM_BP_DIRECT	GO:0001649~osteoblast differentiation	22	0.840015	0.0294988	ENSG00000104332, ENSG00000019186, ENSG00000152661, ENSG00000137809, ENSG00000108821, ENSG00000074047, ENSG00000138623, ENSG00000136235, ENSG00000167460, ENSG00000041982, ENSG00000115641, ENSG00000038427, ENSG00000142156, ENSG00000011028, ENSG00000162551, ENSG00000205213, ENSG00000125845, ENSG00000081189, ENSG00000124813, ENSG00000146674, ENSG00000078804, ENSG00000019549	2217	104	16792	1.60223	1	0.544121	0.535651
GOTERM_BP_DIRECT	GO:0060412~ventricular septum morphogenesis	9	0.343643	0.0301799	ENSG00000204217, ENSG00000164683, ENSG00000106799, ENSG00000117707, ENSG00000115170, ENSG00000148400, ENSG00000101665, ENSG00000164093, ENSG00000124766	2217	29	16792	2.35061	1	0.553189	0.544578
GOTERM_BP_DIRECT	GO:0001558~regulation of cell growth	18	0.687285	0.0301883	ENSG00000185737, ENSG00000136999, ENSG00000072274, ENSG00000152377, ENSG00000150938, ENSG00000171603, ENSG00000082397, ENSG00000079385, ENSG00000163453, ENSG00000170801, ENSG00000118515, ENSG00000120833, ENSG00000188613, ENSG00000163975, ENSG00000146674, ENSG00000107175, ENSG00000141753, ENSG00000050820	2217	80	16792	1.70419	1	0.553189	0.544578
GOTERM_BP_DIRECT	GO:0042542~response to hydrogen peroxide	13	0.496373	0.0308446	ENSG00000104695, ENSG00000109846, ENSG00000175592, ENSG00000100292, ENSG00000108821, ENSG00000115415, ENSG00000134333, ENSG00000196839, ENSG00000087258, ENSG00000030110, ENSG00000164305, ENSG00000109321, ENSG00000102572	2217	51	16792	1.93068	1	0.55919	0.550485
GOTERM_BP_DIRECT	GO:1904659~glucose transmembrane transport	7	0.267278	0.0308959	ENSG00000136856, ENSG00000142583, ENSG00000117394, ENSG00000173262, ENSG00000160326, ENSG00000146411, ENSG00000059804	2217	19	16792	2.79049	1	0.55919	0.550485
GOTERM_BP_DIRECT	GO:0048675~axon extension	8	0.30546	0.0311161	ENSG00000082684, ENSG00000131711, ENSG00000177169, ENSG00000173166, ENSG00000150093, ENSG00000133083, ENSG00000138623, ENSG00000035403	2217	24	16792	2.52473	1	0.55919	0.550485
GOTERM_BP_DIRECT	GO:0045671~negative regulation of osteoclast differentiation	8	0.30546	0.0311161	ENSG00000104332, ENSG00000164342, ENSG00000166147, ENSG00000204103, ENSG00000168036, ENSG00000168918, ENSG00000070404, ENSG00000154127	2217	24	16792	2.52473	1	0.55919	0.550485
GOTERM_BP_DIRECT	GO:0090314~positive regulation of protein targeting to membrane	8	0.30546	0.0311161	ENSG00000168502, ENSG00000198420, ENSG00000185043, ENSG00000148175, ENSG00000108691, ENSG00000176749, ENSG00000197879, ENSG00000170379	2217	24	16792	2.52473	1	0.55919	0.550485
GOTERM_BP_DIRECT	GO:0032456~endocytic recycling	8	0.30546	0.0311161	ENSG00000135823, ENSG00000188042, ENSG00000024422, ENSG00000141252, ENSG00000100139, ENSG00000164877, ENSG00000110047, ENSG00000013016	2217	24	16792	2.52473	1	0.55919	0.550485
GOTERM_BP_DIRECT	GO:0045071~negative regulation of viral genome replication	11	0.420008	0.0316645	ENSG00000172183, ENSG00000145901, ENSG00000187608, ENSG00000130303, ENSG00000117707, ENSG00000089127, ENSG00000232810, ENSG00000185885, ENSG00000185745, ENSG00000163565, ENSG00000157601	2217	40	16792	2.0829	1	0.565243	0.556444
GOTERM_BP_DIRECT	GO:0048468~cell development	11	0.420008	0.0316645	ENSG00000117595, ENSG00000163083, ENSG00000130513, ENSG00000168487, ENSG00000104447, ENSG00000178573, ENSG00000183682, ENSG00000164404, ENSG00000116985, ENSG00000122641, ENSG00000065615	2217	40	16792	2.0829	1	0.565243	0.556444
GOTERM_BP_DIRECT	GO:2001214~positive regulation of vasculogenesis	5	0.190913	0.0328599	ENSG00000079385, ENSG00000116473, ENSG00000109756, ENSG00000128052, ENSG00000166292	2217	10	16792	3.7871	1	0.565243	0.556444
GOTERM_BP_DIRECT	GO:0090084~negative regulation of inclusion body assembly	5	0.190913	0.0328599	ENSG00000105993, ENSG00000135924, ENSG00000126803, ENSG00000151835, ENSG00000132002	2217	10	16792	3.7871	1	0.565243	0.556444
GOTERM_BP_DIRECT	GO:2000727~positive regulation of cardiac muscle cell differentiation	5	0.190913	0.0328599	ENSG00000141052, ENSG00000081189, ENSG00000105329, ENSG00000157168, ENSG00000125266	2217	10	16792	3.7871	1	0.565243	0.556444
GOTERM_BP_DIRECT	GO:0032060~bleb assembly	5	0.190913	0.0328599	ENSG00000065534, ENSG00000109099, ENSG00000142227, ENSG00000134531, ENSG00000177119	2217	10	16792	3.7871	1	0.565243	0.556444
GOTERM_BP_DIRECT	GO:0010761~fibroblast migration	5	0.190913	0.0328599	ENSG00000166333, ENSG00000136999, ENSG00000166224, ENSG00000079308, ENSG00000140464	2217	10	16792	3.7871	1	0.565243	0.556444
GOTERM_BP_DIRECT	GO:0061001~regulation of dendritic spine morphogenesis	5	0.190913	0.0328599	ENSG00000163110, ENSG00000172757, ENSG00000251322, ENSG00000197555, ENSG00000176749	2217	10	16792	3.7871	1	0.565243	0.556444
GOTERM_BP_DIRECT	GO:0051272~positive regulation of cellular component movement	5	0.190913	0.0328599	ENSG00000113916, ENSG00000106799, ENSG00000130402, ENSG00000134954, ENSG00000254087	2217	10	16792	3.7871	1	0.565243	0.556444
GOTERM_BP_DIRECT	GO:0032940~secretion by cell	5	0.190913	0.0328599	ENSG00000140479, ENSG00000135919, ENSG00000144452, ENSG00000106089, ENSG00000140564	2217	10	16792	3.7871	1	0.565243	0.556444
GOTERM_BP_DIRECT	GO:0045080~positive regulation of chemokine biosynthetic process	5	0.190913	0.0328599	ENSG00000172936, ENSG00000164342, ENSG00000100292, ENSG00000232810, ENSG00000127666	2217	10	16792	3.7871	1	0.565243	0.556444
GOTERM_BP_DIRECT	GO:0007268~chemical synaptic transmission	43	1.64185	0.0330764	ENSG00000179546, ENSG00000147571, ENSG00000105711, ENSG00000115419, ENSG00000148680, ENSG00000137766, ENSG00000173621, ENSG00000173267, ENSG00000197535, ENSG00000166073, ENSG00000067715, ENSG00000066427, ENSG00000135643, ENSG00000187372, ENSG00000177839, ENSG00000168036, ENSG00000109099, ENSG00000011132, ENSG00000164418, ENSG00000168959, ENSG00000182389, ENSG00000134769, ENSG00000155980, ENSG0000…	2217	240	16792	1.35704	1	0.565243	0.556444
GOTERM_BP_DIRECT	GO:0035690~cellular response to drug	16	0.61092	0.0333882	ENSG00000177076, ENSG00000162409, ENSG00000108819, ENSG00000072274, ENSG00000065989, ENSG00000171867, ENSG00000164342, ENSG00000116473, ENSG00000167034, ENSG00000081189, ENSG00000183087, ENSG00000078401, ENSG00000108691, ENSG00000125249, ENSG00000127314, ENSG00000148677	2217	69	16792	1.75634	1	0.565243	0.556444
GOTERM_BP_DIRECT	GO:0002819~regulation of adaptive immune response	4	0.15273	0.0336779	ENSG00000185507, ENSG00000129465, ENSG00000143507, ENSG00000125347	2217	6	16792	5.04947	1	0.565243	0.556444
GOTERM_BP_DIRECT	GO:1903672~positive regulation of sprouting angiogenesis	4	0.15273	0.0336779	ENSG00000161638, ENSG00000113578, ENSG00000138685, ENSG00000162434	2217	6	16792	5.04947	1	0.565243	0.556444
GOTERM_BP_DIRECT	GO:1990000~amyloid fibril formation	4	0.15273	0.0336779	ENSG00000129465, ENSG00000137275, ENSG00000142192, ENSG00000148180	2217	6	16792	5.04947	1	0.565243	0.556444
GOTERM_BP_DIRECT	GO:2001200~positive regulation of dendritic cell differentiation	4	0.15273	0.0336779	ENSG00000168961, ENSG00000100097, ENSG00000130584, ENSG00000131981	2217	6	16792	5.04947	1	0.565243	0.556444
GOTERM_BP_DIRECT	GO:0034134~toll-like receptor 2 signaling pathway	4	0.15273	0.0336779	ENSG00000168884, ENSG00000168961, ENSG00000104312, ENSG00000155629	2217	6	16792	5.04947	1	0.565243	0.556444
GOTERM_BP_DIRECT	GO:0051045~negative regulation of membrane protein ectodomain proteolysis	4	0.15273	0.0336779	ENSG00000035862, ENSG00000100234, ENSG00000136634, ENSG00000102265	2217	6	16792	5.04947	1	0.565243	0.556444
GOTERM_BP_DIRECT	GO:0051798~positive regulation of hair follicle development	4	0.15273	0.0336779	ENSG00000232810, ENSG00000134363, ENSG00000102871, ENSG00000128422	2217	6	16792	5.04947	1	0.565243	0.556444
GOTERM_BP_DIRECT	GO:0060137~maternal process involved in parturition	4	0.15273	0.0336779	ENSG00000156574, ENSG00000078401, ENSG00000180914, ENSG00000108691	2217	6	16792	5.04947	1	0.565243	0.556444
GOTERM_BP_DIRECT	GO:0048845~venous blood vessel morphogenesis	4	0.15273	0.0336779	ENSG00000173706, ENSG00000136280, ENSG00000117707, ENSG00000125266	2217	6	16792	5.04947	1	0.565243	0.556444
GOTERM_BP_DIRECT	GO:0086091~regulation of heart rate by cardiac conduction	10	0.381825	0.0341873	ENSG00000134755, ENSG00000096696, ENSG00000166257, ENSG00000105974, ENSG00000105711, ENSG00000123700, ENSG00000153956, ENSG00000173801, ENSG00000057294, ENSG00000046604	2217	35	16792	2.16406	1	0.570366	0.561488
GOTERM_BP_DIRECT	GO:0017158~regulation of calcium ion-dependent exocytosis	10	0.381825	0.0341873	ENSG00000143469, ENSG00000205502, ENSG00000110975, ENSG00000132718, ENSG00000137501, ENSG00000272636, ENSG00000198535, ENSG00000067715, ENSG00000019505, ENSG00000173227	2217	35	16792	2.16406	1	0.570366	0.561488
GOTERM_BP_DIRECT	GO:0045087~innate immune response	71	2.71096	0.0350898	ENSG00000185507, ENSG00000174130, ENSG00000196083, ENSG00000110944, ENSG00000131323, ENSG00000174292, ENSG00000137628, ENSG00000105639, ENSG00000135046, ENSG00000204592, ENSG00000119401, ENSG00000077150, ENSG00000164850, ENSG00000132170, ENSG00000164251, ENSG00000142867, ENSG00000166710, ENSG00000100342, ENSG00000163565, ENSG00000127666, ENSG00000162434, ENSG00000182326, ENSG00000132824, ENSG0000…	2217	430	16792	1.25062	1	0.583682	0.574596
GOTERM_BP_DIRECT	GO:0071320~cellular response to cAMP	13	0.496373	0.0354471	ENSG00000158856, ENSG00000151320, ENSG00000109756, ENSG00000099822, ENSG00000142192, ENSG00000132376, ENSG00000169403, ENSG00000116473, ENSG00000185650, ENSG00000107263, ENSG00000086991, ENSG00000130707, ENSG00000127314	2217	52	16792	1.89355	1	0.587875	0.578724
GOTERM_BP_DIRECT	GO:0051259~protein oligomerization	14	0.534555	0.0365066	ENSG00000102780, ENSG00000105971, ENSG00000090020, ENSG00000152661, ENSG00000172175, ENSG00000172575, ENSG00000176720, ENSG00000111450, ENSG00000097033, ENSG00000144119, ENSG00000118503, ENSG00000089127, ENSG00000142867, ENSG00000124942	2217	58	16792	1.82826	1	0.592015	0.582799
GOTERM_BP_DIRECT	GO:0044344~cellular response to fibroblast growth factor stimulus	9	0.343643	0.0365441	ENSG00000104332, ENSG00000023909, ENSG00000108821, ENSG00000001084, ENSG00000185650, ENSG00000108691, ENSG00000117139, ENSG00000169429, ENSG00000019549	2217	30	16792	2.27226	1	0.592015	0.582799
GOTERM_BP_DIRECT	GO:2000379~positive regulation of reactive oxygen species metabolic process	9	0.343643	0.0365441	ENSG00000129465, ENSG00000140254, ENSG00000137275, ENSG00000116717, ENSG00000137801, ENSG00000100311, ENSG00000086991, ENSG00000196139, ENSG00000124762	2217	30	16792	2.27226	1	0.592015	0.582799
GOTERM_BP_DIRECT	GO:0021915~neural tube development	9	0.343643	0.0365441	ENSG00000081059, ENSG00000117707, ENSG00000075223, ENSG00000105329, ENSG00000166341, ENSG00000185650, ENSG00000148400, ENSG00000165617, ENSG00000185614	2217	30	16792	2.27226	1	0.592015	0.582799
GOTERM_BP_DIRECT	GO:0071773~cellular response to BMP stimulus	9	0.343643	0.0365441	ENSG00000204217, ENSG00000104332, ENSG00000166145, ENSG00000125845, ENSG00000115170, ENSG00000124813, ENSG00000136378, ENSG00000166292, ENSG00000101144	2217	30	16792	2.27226	1	0.592015	0.582799
GOTERM_BP_DIRECT	GO:0010803~regulation of tumor necrosis factor-mediated signaling pathway	9	0.343643	0.0365441	ENSG00000023445, ENSG00000137275, ENSG00000118503, ENSG00000083799, ENSG00000232810, ENSG00000056558, ENSG00000102871, ENSG00000176170, ENSG00000110330	2217	30	16792	2.27226	1	0.592015	0.582799
GOTERM_BP_DIRECT	GO:0009966~regulation of signal transduction	9	0.343643	0.0365441	ENSG00000170558, ENSG00000074416, ENSG00000167992, ENSG00000196396, ENSG00000120833, ENSG00000188766, ENSG00000196526, ENSG00000140564, ENSG00000170027	2217	30	16792	2.27226	1	0.592015	0.582799
GOTERM_BP_DIRECT	GO:0006812~cation transport	9	0.343643	0.0365441	ENSG00000110218, ENSG00000131620, ENSG00000160746, ENSG00000144191, ENSG00000159363, ENSG00000090674, ENSG00000165548, ENSG00000154864, ENSG00000177119	2217	30	16792	2.27226	1	0.592015	0.582799
GOTERM_BP_DIRECT	GO:0030509~BMP signaling pathway	17	0.649103	0.0375694	ENSG00000174460, ENSG00000156574, ENSG00000166292, ENSG00000198742, ENSG00000116985, ENSG00000112175, ENSG00000204217, ENSG00000163430, ENSG00000188522, ENSG00000168487, ENSG00000125845, ENSG00000115170, ENSG00000124813, ENSG00000183682, ENSG00000164404, ENSG00000101665, ENSG00000101144	2217	76	16792	1.69423	1	0.606865	0.597418
GOTERM_BP_DIRECT	GO:0043122~regulation of I-kappaB kinase/NF-kappaB signaling	6	0.229095	0.038211	ENSG00000136848, ENSG00000123240, ENSG00000161011, ENSG00000164251, ENSG00000232810, ENSG00000106211	2217	15	16792	3.02968	1	0.608436	0.598965
GOTERM_BP_DIRECT	GO:0010633~negative regulation of epithelial cell migration	6	0.229095	0.038211	ENSG00000136848, ENSG00000184292, ENSG00000144724, ENSG00000140832, ENSG00000171444, ENSG00000110880	2217	15	16792	3.02968	1	0.608436	0.598965
GOTERM_BP_DIRECT	GO:0035024~negative regulation of Rho protein signal transduction	6	0.229095	0.038211	ENSG00000113916, ENSG00000165895, ENSG00000120318, ENSG00000150093, ENSG00000109079, ENSG00000005884	2217	15	16792	3.02968	1	0.608436	0.598965
GOTERM_BP_DIRECT	GO:0060397~JAK-STAT cascade involved in growth hormone signaling pathway	6	0.229095	0.038211	ENSG00000113494, ENSG00000168610, ENSG00000126561, ENSG00000196396, ENSG00000105639, ENSG00000254087	2217	15	16792	3.02968	1	0.608436	0.598965
GOTERM_BP_DIRECT	GO:0046688~response to copper ion	6	0.229095	0.038211	ENSG00000171867, ENSG00000115008, ENSG00000134013, ENSG00000145730, ENSG00000090339, ENSG00000189171	2217	15	16792	3.02968	1	0.608436	0.598965
GOTERM_BP_DIRECT	GO:0042327~positive regulation of phosphorylation	8	0.30546	0.0384449	ENSG00000148925, ENSG00000166333, ENSG00000091409, ENSG00000155760, ENSG00000106070, ENSG00000109321, ENSG00000142867, ENSG00000137801	2217	25	16792	2.42374	1	0.608693	0.599218
GOTERM_BP_DIRECT	GO:0051899~membrane depolarization	8	0.30546	0.0384449	ENSG00000166257, ENSG00000105974, ENSG00000105711, ENSG00000078401, ENSG00000075461, ENSG00000198216, ENSG00000182389, ENSG00000167535	2217	25	16792	2.42374	1	0.608693	0.599218
GOTERM_BP_DIRECT	GO:0000187~activation of MAPK activity	22	0.840015	0.0389893	ENSG00000069696, ENSG00000104312, ENSG00000175344, ENSG00000113578, ENSG00000176945, ENSG00000157168, ENSG00000137801, ENSG00000077264, ENSG00000138685, ENSG00000267534, ENSG00000119699, ENSG00000134070, ENSG00000138166, ENSG00000125845, ENSG00000164086, ENSG00000185386, ENSG00000232810, ENSG00000129946, ENSG00000162734, ENSG00000162889, ENSG00000017427, ENSG00000163235	2217	107	16792	1.55731	1	0.615568	0.605986
GOTERM_BP_DIRECT	GO:0031532~actin cytoskeleton reorganization	12	0.45819	0.0391389	ENSG00000196924, ENSG00000085733, ENSG00000171219, ENSG00000196396, ENSG00000198752, ENSG00000006607, ENSG00000100345, ENSG00000164877, ENSG00000197555, ENSG00000135046, ENSG00000125249, ENSG00000267534	2217	47	16792	1.93384	1	0.616189	0.606597
GOTERM_BP_DIRECT	GO:0043407~negative regulation of MAP kinase activity	10	0.381825	0.0404272	ENSG00000136848, ENSG00000166311, ENSG00000196396, ENSG00000164086, ENSG00000254087, ENSG00000177628, ENSG00000163291, ENSG00000132376, ENSG00000101144, ENSG00000112079	2217	36	16792	2.10394	1	0.634685	0.624805
GOTERM_BP_DIRECT	GO:0032869~cellular response to insulin stimulus	17	0.649103	0.0418274	ENSG00000090020, ENSG00000115415, ENSG00000168461, ENSG00000137449, ENSG00000197535, ENSG00000132376, ENSG00000170027, ENSG00000079385, ENSG00000150907, ENSG00000084733, ENSG00000001084, ENSG00000163083, ENSG00000132170, ENSG00000169047, ENSG00000185650, ENSG00000048052, ENSG00000108691	2217	77	16792	1.67223	1	0.654827	0.644634
GOTERM_BP_DIRECT	GO:0001934~positive regulation of protein phosphorylation	25	0.954563	0.0429136	ENSG00000147571, ENSG00000182718, ENSG00000128052, ENSG00000172575, ENSG00000136235, ENSG00000174775, ENSG00000118971, ENSG00000164850, ENSG00000135362, ENSG00000125845, ENSG00000153071, ENSG00000125249, ENSG00000259207, ENSG00000148053, ENSG00000105329, ENSG00000110092, ENSG00000137275, ENSG00000167034, ENSG00000161011, ENSG00000185043, ENSG00000183087, ENSG00000232810, ENSG00000108950, ENSG0000…	2217	127	16792	1.49098	1	0.669956	0.659527
GOTERM_BP_DIRECT	GO:0042771~intrinsic apoptotic signaling pathway in response to DNA damage by p53 class mediator	9	0.343643	0.0437518	ENSG00000181026, ENSG00000185088, ENSG00000164054, ENSG00000089486, ENSG00000174307, ENSG00000163565, ENSG00000073282, ENSG00000140464, ENSG00000124762	2217	31	16792	2.19896	1	0.672299	0.661834
GOTERM_BP_DIRECT	GO:0043507~positive regulation of JUN kinase activity	9	0.343643	0.0437518	ENSG00000136848, ENSG00000174130, ENSG00000146192, ENSG00000156299, ENSG00000162738, ENSG00000078401, ENSG00000232810, ENSG00000130758, ENSG00000141655	2217	31	16792	2.19896	1	0.672299	0.661834
GOTERM_BP_DIRECT	GO:0045765~regulation of angiogenesis	9	0.343643	0.0437518	ENSG00000104332, ENSG00000109854, ENSG00000134954, ENSG00000156234, ENSG00000100292, ENSG00000168036, ENSG00000136235, ENSG00000006327, ENSG00000138685	2217	31	16792	2.19896	1	0.672299	0.661834
GOTERM_BP_DIRECT	GO:0051897~positive regulation of protein kinase B signaling	18	0.687285	0.0458835	ENSG00000106799, ENSG00000197461, ENSG00000105329, ENSG00000117525, ENSG00000157168, ENSG00000137801, ENSG00000196139, ENSG00000138685, ENSG00000133048, ENSG00000151632, ENSG00000166333, ENSG00000258839, ENSG00000113070, ENSG00000120659, ENSG00000183087, ENSG00000232810, ENSG00000164976, ENSG00000086991	2217	84	16792	1.62304	1	0.672299	0.661834
GOTERM_BP_DIRECT	GO:0042347~negative regulation of NF-kappaB import into nucleus	5	0.190913	0.0463627	ENSG00000189067, ENSG00000136999, ENSG00000083799, ENSG00000100614, ENSG00000101144	2217	11	16792	3.44282	1	0.672299	0.661834
GOTERM_BP_DIRECT	GO:0032495~response to muramyl dipeptide	5	0.190913	0.0463627	ENSG00000118503, ENSG00000148400, ENSG00000128604, ENSG00000173039, ENSG00000101384	2217	11	16792	3.44282	1	0.672299	0.661834
GOTERM_BP_DIRECT	GO:0016064~immunoglobulin mediated immune response	5	0.190913	0.0463627	ENSG00000185507, ENSG00000172936, ENSG00000077238, ENSG00000168918, ENSG00000142867	2217	11	16792	3.44282	1	0.672299	0.661834
GOTERM_BP_DIRECT	GO:0051764~actin crosslink formation	5	0.190913	0.0463627	ENSG00000196924, ENSG00000072110, ENSG00000113657, ENSG00000136167, ENSG00000102024	2217	11	16792	3.44282	1	0.672299	0.661834
GOTERM_BP_DIRECT	GO:0030517~negative regulation of axon extension	5	0.190913	0.0463627	ENSG00000127870, ENSG00000162490, ENSG00000065320, ENSG00000176749, ENSG00000115310	2217	11	16792	3.44282	1	0.672299	0.661834
GOTERM_BP_DIRECT	GO:2000178~negative regulation of neural precursor cell proliferation	5	0.190913	0.0463627	ENSG00000166333, ENSG00000166145, ENSG00000159388, ENSG00000107263, ENSG00000072163	2217	11	16792	3.44282	1	0.672299	0.661834
GOTERM_BP_DIRECT	GO:0048711~positive regulation of astrocyte differentiation	5	0.190913	0.0463627	ENSG00000128342, ENSG00000125845, ENSG00000148400, ENSG00000135919, ENSG00000175505	2217	11	16792	3.44282	1	0.672299	0.661834
GOTERM_BP_DIRECT	GO:0003181~atrioventricular valve morphogenesis	5	0.190913	0.0463627	ENSG00000204217, ENSG00000135679, ENSG00000125845, ENSG00000115170, ENSG00000148400	2217	11	16792	3.44282	1	0.672299	0.661834
GOTERM_BP_DIRECT	GO:0010759~positive regulation of macrophage chemotaxis	5	0.190913	0.0463627	ENSG00000120337, ENSG00000184371, ENSG00000108691, ENSG00000137801, ENSG00000171860	2217	11	16792	3.44282	1	0.672299	0.661834
GOTERM_BP_DIRECT	GO:0045666~positive regulation of neuron differentiation	17	0.649103	0.0464196	ENSG00000153266, ENSG00000113916, ENSG00000158747, ENSG00000074047, ENSG00000213859, ENSG00000198797, ENSG00000158555, ENSG00000119401, ENSG00000151917, ENSG00000064309, ENSG00000140254, ENSG00000035862, ENSG00000125845, ENSG00000008294, ENSG00000081189, ENSG00000101144, ENSG00000108960	2217	78	16792	1.65079	1	0.672299	0.661834
GOTERM_BP_DIRECT	GO:0016266~O-glycan processing	14	0.534555	0.0466753	ENSG00000176383, ENSG00000070731, ENSG00000176597, ENSG00000198488, ENSG00000136542, ENSG00000176945, ENSG00000156966, ENSG00000164574, ENSG00000176928, ENSG00000157350, ENSG00000187210, ENSG00000145113, ENSG00000109586, ENSG00000143641	2217	60	16792	1.76731	1	0.672299	0.661834
GOTERM_BP_DIRECT	GO:0016485~protein processing	16	0.61092	0.0467692	ENSG00000160613, ENSG00000099139, ENSG00000205155, ENSG00000137845, ENSG00000117525, ENSG00000131187, ENSG00000080815, ENSG00000158315, ENSG00000157227, ENSG00000163131, ENSG00000117298, ENSG00000101844, ENSG00000106571, ENSG00000140479, ENSG00000129667, ENSG00000140564	2217	72	16792	1.68316	1	0.672299	0.661834
GOTERM_BP_DIRECT	GO:0051491~positive regulation of filopodium assembly	8	0.30546	0.0468176	ENSG00000119699, ENSG00000197959, ENSG00000106799, ENSG00000099864, ENSG00000113657, ENSG00000188157, ENSG00000187017, ENSG00000075618	2217	26	16792	2.33052	1	0.672299	0.661834
GOTERM_BP_DIRECT	GO:0045930~negative regulation of mitotic cell cycle	8	0.30546	0.0468176	ENSG00000035862, ENSG00000167034, ENSG00000112406, ENSG00000105329, ENSG00000198797, ENSG00000136634, ENSG00000140464, ENSG00000149091	2217	26	16792	2.33052	1	0.672299	0.661834
GOTERM_BP_DIRECT	GO:0032757~positive regulation of interleukin-8 production	8	0.30546	0.0468176	ENSG00000169129, ENSG00000164342, ENSG00000137275, ENSG00000232810, ENSG00000168040, ENSG00000105287, ENSG00000106366, ENSG00000107201	2217	26	16792	2.33052	1	0.672299	0.661834
GOTERM_BP_DIRECT	GO:0045786~negative regulation of cell cycle	10	0.381825	0.0473933	ENSG00000073756, ENSG00000134954, ENSG00000125845, ENSG00000213445, ENSG00000105329, ENSG00000107175, ENSG00000101144, ENSG00000020633, ENSG00000152894, ENSG00000122641	2217	37	16792	2.04708	1	0.672299	0.661834
GOTERM_BP_DIRECT	GO:0021773~striatal medium spiny neuron differentiation	3	0.114548	0.0476347	ENSG00000251322, ENSG00000127152, ENSG00000122641	2217	3	16792	7.5742	1	0.672299	0.661834
GOTERM_BP_DIRECT	GO:2001016~positive regulation of skeletal muscle cell differentiation	3	0.114548	0.0476347	ENSG00000081189, ENSG00000063660, ENSG00000133794	2217	3	16792	7.5742	1	0.672299	0.661834
GOTERM_BP_DIRECT	GO:0032675~regulation of interleukin-6 production	3	0.114548	0.0476347	ENSG00000169129, ENSG00000234745, ENSG00000162889	2217	3	16792	7.5742	1	0.672299	0.661834
GOTERM_BP_DIRECT	GO:0098903~regulation of membrane repolarization during action potential	3	0.114548	0.0476347	ENSG00000105974, ENSG00000153956, ENSG00000167535	2217	3	16792	7.5742	1	0.672299	0.661834
GOTERM_BP_DIRECT	GO:0044691~tooth eruption	3	0.114548	0.0476347	ENSG00000108821, ENSG00000154736, ENSG00000108950	2217	3	16792	7.5742	1	0.672299	0.661834
GOTERM_BP_DIRECT	GO:0097286~iron ion import	3	0.114548	0.0476347	ENSG00000167996, ENSG00000163975, ENSG00000072274	2217	3	16792	7.5742	1	0.672299	0.661834
GOTERM_BP_DIRECT	GO:0060544~regulation of necroptotic process	3	0.114548	0.0476347	ENSG00000023445, ENSG00000003402, ENSG00000110330	2217	3	16792	7.5742	1	0.672299	0.661834
GOTERM_BP_DIRECT	GO:0070561~vitamin D receptor signaling pathway	3	0.114548	0.0476347	ENSG00000019186, ENSG00000137193, ENSG00000111424	2217	3	16792	7.5742	1	0.672299	0.661834
GOTERM_BP_DIRECT	GO:0010868~negative regulation of triglyceride biosynthetic process	3	0.114548	0.0476347	ENSG00000142178, ENSG00000109670, ENSG00000275993	2217	3	16792	7.5742	1	0.672299	0.661834
GOTERM_BP_DIRECT	GO:0035583~sequestering of TGFbeta in extracellular matrix	3	0.114548	0.0476347	ENSG00000138829, ENSG00000166147, ENSG00000049323	2217	3	16792	7.5742	1	0.672299	0.661834
GOTERM_BP_DIRECT	GO:0043243~positive regulation of protein complex disassembly	3	0.114548	0.0476347	ENSG00000232810, ENSG00000177628, ENSG00000176171	2217	3	16792	7.5742	1	0.672299	0.661834
GOTERM_BP_DIRECT	GO:0048713~regulation of oligodendrocyte differentiation	3	0.114548	0.0476347	ENSG00000158715, ENSG00000146072, ENSG00000071127	2217	3	16792	7.5742	1	0.672299	0.661834
GOTERM_BP_DIRECT	GO:0043932~ossification involved in bone remodeling	3	0.114548	0.0476347	ENSG00000119699, ENSG00000105329, ENSG00000164932	2217	3	16792	7.5742	1	0.672299	0.661834
GOTERM_BP_DIRECT	GO:0045110~intermediate filament bundle assembly	3	0.114548	0.0476347	ENSG00000081277, ENSG00000186847, ENSG00000057294	2217	3	16792	7.5742	1	0.672299	0.661834
GOTERM_BP_DIRECT	GO:0002158~osteoclast proliferation	3	0.114548	0.0476347	ENSG00000184371, ENSG00000120659, ENSG00000113389	2217	3	16792	7.5742	1	0.672299	0.661834
GOTERM_BP_DIRECT	GO:2000670~positive regulation of dendritic cell apoptotic process	3	0.114548	0.0476347	ENSG00000168961, ENSG00000109756, ENSG00000254087	2217	3	16792	7.5742	1	0.672299	0.661834
GOTERM_BP_DIRECT	GO:0010046~response to mycotoxin	3	0.114548	0.0476347	ENSG00000030110, ENSG00000148346, ENSG00000130707	2217	3	16792	7.5742	1	0.672299	0.661834
GOTERM_BP_DIRECT	GO:2000116~regulation of cysteine-type endopeptidase activity	3	0.114548	0.0476347	ENSG00000023445, ENSG00000240065, ENSG00000110330	2217	3	16792	7.5742	1	0.672299	0.661834
GOTERM_BP_DIRECT	GO:0016055~Wnt signaling pathway	34	1.29821	0.0486852	ENSG00000135925, ENSG00000162409, ENSG00000106829, ENSG00000164093, ENSG00000171444, ENSG00000154764, ENSG00000140682, ENSG00000116141, ENSG00000168036, ENSG00000162490, ENSG00000153071, ENSG00000050165, ENSG00000127603, ENSG00000162552, ENSG00000140807, ENSG00000177374, ENSG00000143816, ENSG00000213977, ENSG00000111186, ENSG00000197943, ENSG00000131650, ENSG00000269113, ENSG00000167874, ENSG0000…	2217	187	16792	1.37713	1	0.682272	0.671652
GOTERM_BP_DIRECT	GO:0031954~positive regulation of protein autophosphorylation	7	0.267278	0.0491371	ENSG00000181467, ENSG00000197461, ENSG00000136235, ENSG00000145431, ENSG00000100311, ENSG00000125249, ENSG00000101265	2217	21	16792	2.52473	1	0.682272	0.671652
GOTERM_BP_DIRECT	GO:0045921~positive regulation of exocytosis	7	0.267278	0.0491371	ENSG00000092929, ENSG00000171560, ENSG00000107130, ENSG00000171564, ENSG00000074054, ENSG00000123595, ENSG00000171557	2217	21	16792	2.52473	1	0.682272	0.671652
GOTERM_BP_DIRECT	GO:0042346~positive regulation of NF-kappaB import into nucleus	7	0.267278	0.0491371	ENSG00000110944, ENSG00000164342, ENSG00000168961, ENSG00000073756, ENSG00000232810, ENSG00000176907, ENSG00000176170	2217	21	16792	2.52473	1	0.682272	0.671652
GOTERM_BP_DIRECT	GO:0097150~neuronal stem cell population maintenance	7	0.267278	0.0491371	ENSG00000170558, ENSG00000150907, ENSG00000117707, ENSG00000125966, ENSG00000148400, ENSG00000168172, ENSG00000101384	2217	21	16792	2.52473	1	0.682272	0.671652
GOTERM_BP_DIRECT	GO:0050772~positive regulation of axonogenesis	7	0.267278	0.0491371	ENSG00000169855, ENSG00000136603, ENSG00000156299, ENSG00000148053, ENSG00000196576, ENSG00000185008, ENSG00000134259	2217	21	16792	2.52473	1	0.682272	0.671652
GOTERM_BP_DIRECT	GO:0016486~peptide hormone processing	6	0.229095	0.0497155	ENSG00000117298, ENSG00000160613, ENSG00000102109, ENSG00000099139, ENSG00000140479, ENSG00000140564	2217	16	16792	2.84032	1	0.682272	0.671652
GOTERM_BP_DIRECT	GO:0045109~intermediate filament organization	6	0.229095	0.0497155	ENSG00000105993, ENSG00000096696, ENSG00000026025, ENSG00000261150, ENSG00000128422, ENSG00000173744	2217	16	16792	2.84032	1	0.682272	0.671652
GOTERM_BP_DIRECT	GO:0007220~Notch receptor processing	6	0.229095	0.0497155	ENSG00000184916, ENSG00000205155, ENSG00000137845, ENSG00000080815, ENSG00000074181, ENSG00000101384	2217	16	16792	2.84032	1	0.682272	0.671652
GOTERM_BP_DIRECT	GO:0090026~positive regulation of monocyte chemotaxis	6	0.229095	0.0497155	ENSG00000120337, ENSG00000108691, ENSG00000163823, ENSG00000107175, ENSG00000106366, ENSG00000177119	2217	16	16792	2.84032	1	0.682272	0.671652
GOTERM_BP_DIRECT	GO:0045785~positive regulation of cell adhesion	11	0.420008	0.0498062	ENSG00000275896, ENSG00000120337, ENSG00000198959, ENSG00000232810, ENSG00000205336, ENSG00000181284, ENSG00000138448, ENSG00000173156, ENSG00000164171, ENSG00000157168, ENSG00000105287	2217	43	16792	1.93759	1	0.682272	0.671652
GOTERM_BP_DIRECT	GO:0030155~regulation of cell adhesion	11	0.420008	0.0498062	ENSG00000113494, ENSG00000108669, ENSG00000184916, ENSG00000163536, ENSG00000074590, ENSG00000090339, ENSG00000169429, ENSG00000053747, ENSG00000143322, ENSG00000140464, ENSG00000183943	2217	43	16792	1.93759	1	0.682272	0.671652
GOTERM_BP_DIRECT	GO:0008544~epidermis development	18	0.687285	0.0505768	ENSG00000096696, ENSG00000175315, ENSG00000169594, ENSG00000058085, ENSG00000134531, ENSG00000172818, ENSG00000131080, ENSG00000158055, ENSG00000184486, ENSG00000186832, ENSG00000204539, ENSG00000186847, ENSG00000164687, ENSG00000128422, ENSG00000053747, ENSG00000087494, ENSG00000104055, ENSG00000163435	2217	85	16792	1.60395	1	0.69039	0.679643
GOTERM_BP_DIRECT	GO:0021762~substantia nigra development	12	0.45819	0.0513075	ENSG00000114450, ENSG00000127561, ENSG00000108515, ENSG00000075624, ENSG00000069535, ENSG00000166165, ENSG00000176788, ENSG00000070831, ENSG00000138685, ENSG00000134333, ENSG00000117115, ENSG00000148798	2217	49	16792	1.85491	1	0.69039	0.679643
GOTERM_BP_DIRECT	GO:0007093~mitotic cell cycle checkpoint	9	0.343643	0.0518354	ENSG00000173846, ENSG00000105329, ENSG00000147883, ENSG00000143816, ENSG00000174775, ENSG00000072609, ENSG00000171552, ENSG00000173559, ENSG00000145632	2217	32	16792	2.13024	1	0.69039	0.679643
GOTERM_BP_DIRECT	GO:0031663~lipopolysaccharide-mediated signaling pathway	9	0.343643	0.0518354	ENSG00000134070, ENSG00000172936, ENSG00000169403, ENSG00000104312, ENSG00000105329, ENSG00000232810, ENSG00000254087, ENSG00000108691, ENSG00000127666	2217	32	16792	2.13024	1	0.69039	0.679643
GOTERM_BP_DIRECT	GO:0045595~regulation of cell differentiation	9	0.343643	0.0518354	ENSG00000136826, ENSG00000119314, ENSG00000142178, ENSG00000124813, ENSG00000020633, ENSG00000275993, ENSG00000115762, ENSG00000110330, ENSG00000137203	2217	32	16792	2.13024	1	0.69039	0.679643
GOTERM_BP_DIRECT	GO:0050873~brown fat cell differentiation	9	0.343643	0.0518354	ENSG00000091409, ENSG00000073756, ENSG00000122644, ENSG00000176845, ENSG00000169252, ENSG00000197930, ENSG00000172216, ENSG00000171236, ENSG00000176171	2217	32	16792	2.13024	1	0.69039	0.679643
GOTERM_BP_DIRECT	GO:0007032~endosome organization	9	0.343643	0.0518354	ENSG00000265190, ENSG00000135956, ENSG00000135823, ENSG00000178038, ENSG00000124209, ENSG00000198324, ENSG00000168172, ENSG00000177096, ENSG00000104142	2217	32	16792	2.13024	1	0.69039	0.679643
GOTERM_BP_DIRECT	GO:0019882~antigen processing and presentation	13	0.496373	0.0521268	ENSG00000175582, ENSG00000104856, ENSG00000204264, ENSG00000153029, ENSG00000204592, ENSG00000204525, ENSG00000163131, ENSG00000084733, ENSG00000169213, ENSG00000204520, ENSG00000155918, ENSG00000234745, ENSG00000118508	2217	55	16792	1.79027	1	0.69039	0.679643
GOTERM_BP_DIRECT	GO:0042475~odontogenesis of dentin-containing tooth	13	0.496373	0.0521268	ENSG00000184916, ENSG00000127152, ENSG00000074047, ENSG00000115844, ENSG00000164093, ENSG00000041982, ENSG00000044115, ENSG00000073282, ENSG00000125845, ENSG00000168036, ENSG00000124813, ENSG00000106571, ENSG00000101144	2217	55	16792	1.79027	1	0.69039	0.679643
GOTERM_BP_DIRECT	GO:0001933~negative regulation of protein phosphorylation	14	0.534555	0.0524318	ENSG00000136848, ENSG00000179820, ENSG00000105329, ENSG00000135596, ENSG00000163291, ENSG00000077232, ENSG00000132376, ENSG00000110880, ENSG00000156535, ENSG00000171867, ENSG00000135362, ENSG00000185043, ENSG00000254087, ENSG00000146674	2217	61	16792	1.73834	1	0.69039	0.679643
GOTERM_BP_DIRECT	GO:0032092~positive regulation of protein binding	14	0.534555	0.0524318	ENSG00000100060, ENSG00000105974, ENSG00000109756, ENSG00000156299, ENSG00000125845, ENSG00000164932, ENSG00000165617, ENSG00000163554, ENSG00000166710, ENSG00000095739, ENSG00000106003, ENSG00000127666, ENSG00000106123, ENSG00000145632	2217	61	16792	1.73834	1	0.69039	0.679643
GOTERM_BP_DIRECT	GO:0006950~response to stress	14	0.534555	0.0524318	ENSG00000175274, ENSG00000145040, ENSG00000116717, ENSG00000164938, ENSG00000162409, ENSG00000099860, ENSG00000161011, ENSG00000118515, ENSG00000185386, ENSG00000143507, ENSG00000182165, ENSG00000162889, ENSG00000184602, ENSG00000103034	2217	61	16792	1.73834	1	0.69039	0.679643
GOTERM_BP_DIRECT	GO:0051099~positive regulation of binding	4	0.15273	0.0532399	ENSG00000155962, ENSG00000182718, ENSG00000154813, ENSG00000197747	2217	7	16792	4.32811	1	0.69039	0.679643
GOTERM_BP_DIRECT	GO:2000427~positive regulation of apoptotic cell clearance	4	0.15273	0.0532399	ENSG00000224389, ENSG00000140545, ENSG00000108691, ENSG00000125730	2217	7	16792	4.32811	1	0.69039	0.679643
GOTERM_BP_DIRECT	GO:1900029~positive regulation of ruffle assembly	4	0.15273	0.0532399	ENSG00000131037, ENSG00000174775, ENSG00000106078, ENSG00000177106	2217	7	16792	4.32811	1	0.69039	0.679643
GOTERM_BP_DIRECT	GO:0021902~commitment of neuronal cell to specific neuron type in forebrain	4	0.15273	0.0532399	ENSG00000153266, ENSG00000127152, ENSG00000119042, ENSG00000136535	2217	7	16792	4.32811	1	0.69039	0.679643
GOTERM_BP_DIRECT	GO:0071455~cellular response to hyperoxia	4	0.15273	0.0532399	ENSG00000150907, ENSG00000105974, ENSG00000132170, ENSG00000026103	2217	7	16792	4.32811	1	0.69039	0.679643
GOTERM_BP_DIRECT	GO:0072577~endothelial cell apoptotic process	4	0.15273	0.0532399	ENSG00000136848, ENSG00000204217, ENSG00000169031, ENSG00000136634	2217	7	16792	4.32811	1	0.69039	0.679643
GOTERM_BP_DIRECT	GO:0031340~positive regulation of vesicle fusion	4	0.15273	0.0532399	ENSG00000182718, ENSG00000272636, ENSG00000135046, ENSG00000067715	2217	7	16792	4.32811	1	0.69039	0.679643
GOTERM_BP_DIRECT	GO:0090050~positive regulation of cell migration involved in sprouting angiogenesis	4	0.15273	0.0532399	ENSG00000073756, ENSG00000185043, ENSG00000102359, ENSG00000048052	2217	7	16792	4.32811	1	0.69039	0.679643
GOTERM_BP_DIRECT	GO:0051444~negative regulation of ubiquitin-protein transferase activity	4	0.15273	0.0532399	ENSG00000147889, ENSG00000101665, ENSG00000106683, ENSG00000080815	2217	7	16792	4.32811	1	0.69039	0.679643
GOTERM_BP_DIRECT	GO:1900121~negative regulation of receptor binding	4	0.15273	0.0532399	ENSG00000142949, ENSG00000182718, ENSG00000095713, ENSG00000166710	2217	7	16792	4.32811	1	0.69039	0.679643
GOTERM_BP_DIRECT	GO:0060710~chorio-allantoic fusion	4	0.15273	0.0532399	ENSG00000105993, ENSG00000185650, ENSG00000101144, ENSG00000112175	2217	7	16792	4.32811	1	0.69039	0.679643
GOTERM_BP_DIRECT	GO:0001942~hair follicle development	10	0.381825	0.0551104	ENSG00000197461, ENSG00000205213, ENSG00000162738, ENSG00000135925, ENSG00000075275, ENSG00000139292, ENSG00000173039, ENSG00000122641, ENSG00000164930, ENSG00000156535	2217	38	16792	1.99321	1	0.712991	0.701892
GOTERM_BP_DIRECT	GO:0031069~hair follicle morphogenesis	8	0.30546	0.0562681	ENSG00000163472, ENSG00000168036, ENSG00000135925, ENSG00000148400, ENSG00000070831, ENSG00000164379, ENSG00000128422, ENSG00000073282	2217	27	16792	2.24421	1	0.724833	0.71355
GOTERM_BP_DIRECT	GO:0090090~negative regulation of canonical Wnt signaling pathway	30	1.14548	0.0562852	ENSG00000105974, ENSG00000175166, ENSG00000171444, ENSG00000240065, ENSG00000125845, ENSG00000162490, ENSG00000153071, ENSG00000050165, ENSG00000148400, ENSG00000164932, ENSG00000162552, ENSG00000141753, ENSG00000164930, ENSG00000136848, ENSG00000104332, ENSG00000140807, ENSG00000204264, ENSG00000111186, ENSG00000131650, ENSG00000167874, ENSG00000170558, ENSG00000150907, ENSG00000083799, ENSG0000…	2217	163	16792	1.39402	1	0.724833	0.71355
GOTERM_BP_DIRECT	GO:0051091~positive regulation of sequence-specific DNA binding transcription factor activity	21	0.801833	0.0564635	ENSG00000175592, ENSG00000156574, ENSG00000132109, ENSG00000068971, ENSG00000132274, ENSG00000136634, ENSG00000173801, ENSG00000119401, ENSG00000080561, ENSG00000138772, ENSG00000082512, ENSG00000120659, ENSG00000132170, ENSG00000141052, ENSG00000168036, ENSG00000078401, ENSG00000232810, ENSG00000091831, ENSG00000141655, ENSG00000105287, ENSG00000107201	2217	105	16792	1.51484	1	0.725458	0.714166
GOTERM_BP_DIRECT	GO:0001503~ossification	17	0.649103	0.0566488	ENSG00000140937, ENSG00000094975, ENSG00000116985, ENSG00000112175, ENSG00000020633, ENSG00000204262, ENSG00000196923, ENSG00000143369, ENSG00000120659, ENSG00000168487, ENSG00000124813, ENSG00000183682, ENSG00000185885, ENSG00000101144, ENSG00000141655, ENSG00000101265, ENSG00000070404	2217	80	16792	1.60952	1	0.72617	0.714867
GOTERM_BP_DIRECT	GO:0051965~positive regulation of synapse assembly	14	0.534555	0.0586544	ENSG00000196083, ENSG00000150471, ENSG00000133216, ENSG00000176697, ENSG00000148053, ENSG00000158258, ENSG00000154764, ENSG00000185070, ENSG00000175928, ENSG00000171603, ENSG00000139211, ENSG00000102359, ENSG00000184564, ENSG00000180914	2217	62	16792	1.7103	1	0.750159	0.738481
GOTERM_BP_DIRECT	GO:0010165~response to X-ray	7	0.267278	0.0602898	ENSG00000110092, ENSG00000166130, ENSG00000164305, ENSG00000135046, ENSG00000174405, ENSG00000073282, ENSG00000124762	2217	22	16792	2.40997	1	0.767561	0.755613
GOTERM_BP_DIRECT	GO:0006509~membrane protein ectodomain proteolysis	7	0.267278	0.0602898	ENSG00000135074, ENSG00000100345, ENSG00000205155, ENSG00000164307, ENSG00000137845, ENSG00000080815, ENSG00000138600	2217	22	16792	2.40997	1	0.767561	0.755613
GOTERM_BP_DIRECT	GO:0015758~glucose transport	9	0.343643	0.0608192	ENSG00000136856, ENSG00000142583, ENSG00000117394, ENSG00000078401, ENSG00000159399, ENSG00000176105, ENSG00000156515, ENSG00000164687, ENSG00000059804	2217	33	16792	2.06569	1	0.772542	0.760516
GOTERM_BP_DIRECT	GO:0045944~positive regulation of transcription from RNA polymerase II promoter	147	5.61283	0.0621617	ENSG00000110944, ENSG00000111912, ENSG00000180530, ENSG00000178573, ENSG00000174775, ENSG00000197019, ENSG00000136535, ENSG00000154764, ENSG00000175745, ENSG00000164850, ENSG00000132170, ENSG00000141052, ENSG00000081189, ENSG00000183770, ENSG00000148400, ENSG00000139083, ENSG00000153266, ENSG00000136826, ENSG00000175592, ENSG00000107249, ENSG00000173210, ENSG00000127152, ENSG00000115548, ENSG0000…	2217	981	16792	1.13497	1	0.77427	0.762217
GOTERM_BP_DIRECT	GO:0097067~cellular response to thyroid hormone stimulus	5	0.190913	0.0624816	ENSG00000163131, ENSG00000119138, ENSG00000185340, ENSG00000135363, ENSG00000164733	2217	12	16792	3.15592	1	0.77427	0.762217
GOTERM_BP_DIRECT	GO:0022409~positive regulation of cell-cell adhesion	5	0.190913	0.0624816	ENSG00000091409, ENSG00000156574, ENSG00000162849, ENSG00000101665, ENSG00000070404	2217	12	16792	3.15592	1	0.77427	0.762217
GOTERM_BP_DIRECT	GO:0031669~cellular response to nutrient levels	5	0.190913	0.0624816	ENSG00000177169, ENSG00000145040, ENSG00000162409, ENSG00000148346, ENSG00000090339	2217	12	16792	3.15592	1	0.77427	0.762217
GOTERM_BP_DIRECT	GO:0007171~activation of transmembrane receptor protein tyrosine kinase activity	5	0.190913	0.0624816	ENSG00000113494, ENSG00000185737, ENSG00000169252, ENSG00000145431, ENSG00000157168	2217	12	16792	3.15592	1	0.77427	0.762217
GOTERM_BP_DIRECT	GO:0036066~protein O-linked fucosylation	5	0.190913	0.0624816	ENSG00000136378, ENSG00000187676, ENSG00000137801, ENSG00000178031, ENSG00000154736	2217	12	16792	3.15592	1	0.77427	0.762217
GOTERM_BP_DIRECT	GO:0032727~positive regulation of interferon-alpha production	5	0.190913	0.0624816	ENSG00000185507, ENSG00000104312, ENSG00000128604, ENSG00000107201, ENSG00000115267	2217	12	16792	3.15592	1	0.77427	0.762217
GOTERM_BP_DIRECT	GO:0051893~regulation of focal adhesion assembly	6	0.229095	0.0630332	ENSG00000090020, ENSG00000173156, ENSG00000074054, ENSG00000127603, ENSG00000110880, ENSG00000167657	2217	17	16792	2.67325	1	0.77427	0.762217
GOTERM_BP_DIRECT	GO:0002076~osteoblast development	6	0.229095	0.0630332	ENSG00000130522, ENSG00000124813, ENSG00000074047, ENSG00000119042, ENSG00000087085, ENSG00000087494	2217	17	16792	2.67325	1	0.77427	0.762217
GOTERM_BP_DIRECT	GO:0051497~negative regulation of stress fiber assembly	6	0.229095	0.0630332	ENSG00000184292, ENSG00000158195, ENSG00000144824, ENSG00000131626, ENSG00000074054, ENSG00000132376	2217	17	16792	2.67325	1	0.77427	0.762217
GOTERM_BP_DIRECT	GO:0042325~regulation of phosphorylation	6	0.229095	0.0630332	ENSG00000102359, ENSG00000182541, ENSG00000101144, ENSG00000080815, ENSG00000272398, ENSG00000173457	2217	17	16792	2.67325	1	0.77427	0.762217
GOTERM_BP_DIRECT	GO:0030033~microvillus assembly	6	0.229095	0.0630332	ENSG00000181467, ENSG00000116473, ENSG00000109756, ENSG00000071054, ENSG00000125249, ENSG00000127314	2217	17	16792	2.67325	1	0.77427	0.762217
GOTERM_BP_DIRECT	GO:0042310~vasoconstriction	6	0.229095	0.0630332	ENSG00000179546, ENSG00000105974, ENSG00000168398, ENSG00000148680, ENSG00000078401, ENSG00000127129	2217	17	16792	2.67325	1	0.77427	0.762217
GOTERM_BP_DIRECT	GO:0050860~negative regulation of T cell receptor signaling pathway	6	0.229095	0.0630332	ENSG00000171867, ENSG00000079385, ENSG00000117228, ENSG00000120690, ENSG00000108861, ENSG00000131981	2217	17	16792	2.67325	1	0.77427	0.762217
GOTERM_BP_DIRECT	GO:0071380~cellular response to prostaglandin E stimulus	6	0.229095	0.0630332	ENSG00000104332, ENSG00000132170, ENSG00000162409, ENSG00000078369, ENSG00000186469, ENSG00000171522	2217	17	16792	2.67325	1	0.77427	0.762217
GOTERM_BP_DIRECT	GO:0030199~collagen fibril organization	10	0.381825	0.0635977	ENSG00000106799, ENSG00000108821, ENSG00000130635, ENSG00000099953, ENSG00000182718, ENSG00000113083, ENSG00000134013, ENSG00000139329, ENSG00000122884, ENSG00000204262	2217	39	16792	1.9421	1	0.777784	0.765677
GOTERM_BP_DIRECT	GO:0002062~chondrocyte differentiation	10	0.381825	0.0635977	ENSG00000136999, ENSG00000125845, ENSG00000081189, ENSG00000124813, ENSG00000074047, ENSG00000105329, ENSG00000120708, ENSG00000111186, ENSG00000020633, ENSG00000154764	2217	39	16792	1.9421	1	0.777784	0.765677
GOTERM_BP_DIRECT	GO:0007568~aging	30	1.14548	0.0640775	ENSG00000132932, ENSG00000134013, ENSG00000044115, ENSG00000136634, ENSG00000118432, ENSG00000077150, ENSG00000196839, ENSG00000035862, ENSG00000023909, ENSG00000168610, ENSG00000001084, ENSG00000030110, ENSG00000130707, ENSG00000123384, ENSG00000164136, ENSG00000186847, ENSG00000102265, ENSG00000109846, ENSG00000108515, ENSG00000130522, ENSG00000105329, ENSG00000108819, ENSG00000138685, ENSG0000…	2217	165	16792	1.37713	1	0.781941	0.76977
GOTERM_BP_DIRECT	GO:0032755~positive regulation of interleukin-6 production	11	0.420008	0.0651351	ENSG00000276600, ENSG00000172936, ENSG00000164342, ENSG00000251201, ENSG00000104312, ENSG00000232810, ENSG00000115008, ENSG00000159674, ENSG00000127666, ENSG00000107201, ENSG00000181722	2217	45	16792	1.85147	1	0.789675	0.777383
GOTERM_BP_DIRECT	GO:0032870~cellular response to hormone stimulus	11	0.420008	0.0651351	ENSG00000142178, ENSG00000130522, ENSG00000163453, ENSG00000168610, ENSG00000120833, ENSG00000180914, ENSG00000132376, ENSG00000185008, ENSG00000119630, ENSG00000275993, ENSG00000056291	2217	45	16792	1.85147	1	0.789675	0.777383
GOTERM_BP_DIRECT	GO:0030514~negative regulation of BMP signaling pathway	11	0.420008	0.0651351	ENSG00000104332, ENSG00000158747, ENSG00000136603, ENSG00000105974, ENSG00000170801, ENSG00000100614, ENSG00000187045, ENSG00000148400, ENSG00000198742, ENSG00000101665, ENSG00000070404	2217	45	16792	1.85147	1	0.789675	0.777383
GOTERM_BP_DIRECT	GO:0006936~muscle contraction	21	0.801833	0.0664462	ENSG00000109846, ENSG00000128872, ENSG00000135636, ENSG00000152661, ENSG00000092841, ENSG00000198467, ENSG00000167460, ENSG00000138119, ENSG00000065534, ENSG00000101608, ENSG00000138594, ENSG00000082781, ENSG00000087258, ENSG00000143549, ENSG00000118804, ENSG00000089159, ENSG00000180914, ENSG00000101335, ENSG00000122786, ENSG00000035403, ENSG00000107796	2217	107	16792	1.48653	1	0.803827	0.791314
GOTERM_BP_DIRECT	GO:0040007~growth	8	0.30546	0.0668176	ENSG00000163083, ENSG00000125845, ENSG00000183682, ENSG00000171552, ENSG00000116985, ENSG00000101144, ENSG00000112175, ENSG00000122641	2217	28	16792	2.16406	1	0.806574	0.794018
GOTERM_BP_DIRECT	GO:0030282~bone mineralization	9	0.343643	0.0707194	ENSG00000102174, ENSG00000073756, ENSG00000205213, ENSG00000125845, ENSG00000136235, ENSG00000137745, ENSG00000064932, ENSG00000155090, ENSG00000143367	2217	34	16792	2.00494	1	0.850002	0.83677
GOTERM_BP_DIRECT	GO:0048286~lung alveolus development	9	0.343643	0.0707194	ENSG00000204217, ENSG00000119699, ENSG00000197461, ENSG00000196839, ENSG00000128342, ENSG00000141052, ENSG00000127129, ENSG00000144452, ENSG00000112893	2217	34	16792	2.00494	1	0.850002	0.83677
GOTERM_BP_DIRECT	GO:0031398~positive regulation of protein ubiquitination	14	0.534555	0.0725409	ENSG00000135924, ENSG00000023445, ENSG00000104312, ENSG00000105974, ENSG00000172175, ENSG00000169252, ENSG00000197329, ENSG00000183255, ENSG00000101665, ENSG00000142867, ENSG00000109670, ENSG00000072609, ENSG00000176170, ENSG00000127666	2217	64	16792	1.65686	1	0.866516	0.853028
GOTERM_BP_DIRECT	GO:0048278~vesicle docking	7	0.267278	0.0728207	ENSG00000105971, ENSG00000135604, ENSG00000135823, ENSG00000106089, ENSG00000111450, ENSG00000067715, ENSG00000103034	2217	23	16792	2.30519	1	0.866516	0.853028
GOTERM_BP_DIRECT	GO:0048754~branching morphogenesis of an epithelial tube	7	0.267278	0.0728207	ENSG00000167034, ENSG00000105976, ENSG00000074047, ENSG00000148400, ENSG00000086062, ENSG00000101144, ENSG00000157227	2217	23	16792	2.30519	1	0.866516	0.853028
GOTERM_BP_DIRECT	GO:0046835~carbohydrate phosphorylation	7	0.267278	0.0728207	ENSG00000170525, ENSG00000156510, ENSG00000159399, ENSG00000124357, ENSG00000111670, ENSG00000114268, ENSG00000156515	2217	23	16792	2.30519	1	0.866516	0.853028
GOTERM_BP_DIRECT	GO:0046426~negative regulation of JAK-STAT cascade	10	0.381825	0.0728686	ENSG00000148948, ENSG00000128594, ENSG00000105974, ENSG00000120833, ENSG00000188993, ENSG00000213625, ENSG00000184557, ENSG00000185359, ENSG00000170677, ENSG00000185070	2217	40	16792	1.89355	1	0.866516	0.853028
GOTERM_BP_DIRECT	GO:0045165~cell fate commitment	11	0.420008	0.0738179	ENSG00000132170, ENSG00000125845, ENSG00000104447, ENSG00000135925, ENSG00000143816, ENSG00000057657, ENSG00000111186, ENSG00000162552, ENSG00000154764, ENSG00000140464, ENSG00000132510	2217	46	16792	1.81122	1	0.871708	0.858138
GOTERM_BP_DIRECT	GO:0000186~activation of MAPKK activity	11	0.420008	0.0738179	ENSG00000095015, ENSG00000116473, ENSG00000106799, ENSG00000006062, ENSG00000099860, ENSG00000107263, ENSG00000138685, ENSG00000142733, ENSG00000134259, ENSG00000080815, ENSG00000114353	2217	46	16792	1.81122	1	0.871708	0.858138
GOTERM_BP_DIRECT	GO:0032880~regulation of protein localization	12	0.45819	0.073929	ENSG00000105993, ENSG00000133789, ENSG00000135924, ENSG00000171867, ENSG00000135823, ENSG00000065882, ENSG00000115977, ENSG00000109670, ENSG00000132274, ENSG00000133863, ENSG00000123595, ENSG00000108960	2217	52	16792	1.74789	1	0.871708	0.858138
GOTERM_BP_DIRECT	GO:0030178~negative regulation of Wnt signaling pathway	12	0.45819	0.073929	ENSG00000110092, ENSG00000104332, ENSG00000182704, ENSG00000106070, ENSG00000177374, ENSG00000167693, ENSG00000112559, ENSG00000050165, ENSG00000213977, ENSG00000165617, ENSG00000123384, ENSG00000269113	2217	52	16792	1.74789	1	0.871708	0.858138
GOTERM_BP_DIRECT	GO:0060070~canonical Wnt signaling pathway	17	0.649103	0.074738	ENSG00000136826, ENSG00000147050, ENSG00000104332, ENSG00000155760, ENSG00000143816, ENSG00000080815, ENSG00000154764, ENSG00000110092, ENSG00000101849, ENSG00000062038, ENSG00000081059, ENSG00000168036, ENSG00000124766, ENSG00000102312, ENSG00000070831, ENSG00000162552, ENSG00000019549	2217	83	16792	1.55134	1	0.879391	0.865702
GOTERM_BP_DIRECT	GO:0007219~Notch signaling pathway	22	0.840015	0.0749223	ENSG00000214357, ENSG00000213694, ENSG00000184916, ENSG00000105329, ENSG00000198435, ENSG00000112378, ENSG00000166292, ENSG00000205155, ENSG00000142192, ENSG00000137845, ENSG00000171345, ENSG00000110042, ENSG00000080815, ENSG00000073282, ENSG00000074181, ENSG00000113361, ENSG00000164683, ENSG00000134250, ENSG00000125845, ENSG00000148400, ENSG00000019549, ENSG00000101384	2217	115	16792	1.44898	1	0.879707	0.866013
GOTERM_BP_DIRECT	GO:0060346~bone trabecula formation	4	0.15273	0.0770159	ENSG00000104332, ENSG00000138829, ENSG00000108821, ENSG00000087245	2217	8	16792	3.7871	1	0.88025	0.866547
GOTERM_BP_DIRECT	GO:0042129~regulation of T cell proliferation	4	0.15273	0.0770159	ENSG00000120337, ENSG00000128340, ENSG00000168036, ENSG00000131981	2217	8	16792	3.7871	1	0.88025	0.866547
GOTERM_BP_DIRECT	GO:0071786~endoplasmic reticulum tubular network organization	4	0.15273	0.0770159	ENSG00000084733, ENSG00000099246, ENSG00000132563, ENSG00000115310	2217	8	16792	3.7871	1	0.88025	0.866547
GOTERM_BP_DIRECT	GO:0097345~mitochondrial outer membrane permeabilization	4	0.15273	0.0770159	ENSG00000196072, ENSG00000064655, ENSG00000015475, ENSG00000176171	2217	8	16792	3.7871	1	0.88025	0.866547
GOTERM_BP_DIRECT	GO:0032825~positive regulation of natural killer cell differentiation	4	0.15273	0.0770159	ENSG00000134470, ENSG00000183087, ENSG00000172575, ENSG00000164136	2217	8	16792	3.7871	1	0.88025	0.866547
GOTERM_BP_DIRECT	GO:0060546~negative regulation of necroptotic process	4	0.15273	0.0770159	ENSG00000023445, ENSG00000060138, ENSG00000105974, ENSG00000168040	2217	8	16792	3.7871	1	0.88025	0.866547
GOTERM_BP_DIRECT	GO:0071550~death-inducing signaling complex assembly	4	0.15273	0.0770159	ENSG00000137275, ENSG00000232810, ENSG00000168040, ENSG00000102871	2217	8	16792	3.7871	1	0.88025	0.866547
GOTERM_BP_DIRECT	GO:0010470~regulation of gastrulation	4	0.15273	0.0770159	ENSG00000156574, ENSG00000144824, ENSG00000074054, ENSG00000101076	2217	8	16792	3.7871	1	0.88025	0.866547
GOTERM_BP_DIRECT	GO:0043297~apical junction assembly	4	0.15273	0.0770159	ENSG00000155366, ENSG00000071127, ENSG00000044115, ENSG00000035403	2217	8	16792	3.7871	1	0.88025	0.866547
GOTERM_BP_DIRECT	GO:0071711~basement membrane organization	4	0.15273	0.0770159	ENSG00000187498, ENSG00000099953, ENSG00000116962, ENSG00000185070	2217	8	16792	3.7871	1	0.88025	0.866547
GOTERM_BP_DIRECT	GO:0060100~positive regulation of phagocytosis, engulfment	4	0.15273	0.0770159	ENSG00000132170, ENSG00000164251, ENSG00000164171, ENSG00000177119	2217	8	16792	3.7871	1	0.88025	0.866547
GOTERM_BP_DIRECT	GO:0034115~negative regulation of heterotypic cell-cell adhesion	4	0.15273	0.0770159	ENSG00000136826, ENSG00000179820, ENSG00000136634, ENSG00000136689	2217	8	16792	3.7871	1	0.88025	0.866547
GOTERM_BP_DIRECT	GO:0043068~positive regulation of programmed cell death	4	0.15273	0.0770159	ENSG00000137275, ENSG00000232810, ENSG00000176171, ENSG00000124762	2217	8	16792	3.7871	1	0.88025	0.866547
GOTERM_BP_DIRECT	GO:0060037~pharyngeal system development	6	0.229095	0.0781533	ENSG00000117298, ENSG00000106799, ENSG00000167034, ENSG00000115170, ENSG00000101144, ENSG00000112175	2217	18	16792	2.52473	1	0.885102	0.871324
GOTERM_BP_DIRECT	GO:0071577~zinc II ion transmembrane transport	6	0.229095	0.0781533	ENSG00000165915, ENSG00000104635, ENSG00000170385, ENSG00000158014, ENSG00000162695, ENSG00000112473	2217	18	16792	2.52473	1	0.885102	0.871324
GOTERM_BP_DIRECT	GO:0030705~cytoskeleton-dependent intracellular transport	6	0.229095	0.0781533	ENSG00000137177, ENSG00000155980, ENSG00000167552, ENSG00000129250, ENSG00000162849, ENSG00000054523	2217	18	16792	2.52473	1	0.885102	0.871324
GOTERM_BP_DIRECT	GO:0046627~negative regulation of insulin receptor signaling pathway	8	0.30546	0.0784751	ENSG00000106070, ENSG00000169047, ENSG00000196396, ENSG00000120833, ENSG00000132376, ENSG00000184557, ENSG00000173039, ENSG00000132334	2217	29	16792	2.08943	1	0.885102	0.871324
GOTERM_BP_DIRECT	GO:0045214~sarcomere organization	8	0.30546	0.0784751	ENSG00000071127, ENSG00000150093, ENSG00000134775, ENSG00000170421, ENSG00000122367, ENSG00000171345, ENSG00000184009, ENSG00000148677	2217	29	16792	2.08943	1	0.885102	0.871324
GOTERM_BP_DIRECT	GO:0070098~chemokine-mediated signaling pathway	15	0.572738	0.078549	ENSG00000183625, ENSG00000156234, ENSG00000163739, ENSG00000115009, ENSG00000172215, ENSG00000006210, ENSG00000144648, ENSG00000163734, ENSG00000124875, ENSG00000163735, ENSG00000108691, ENSG00000163823, ENSG00000102962, ENSG00000144476, ENSG00000169429	2217	71	16792	1.60018	1	0.885102	0.871324
GOTERM_BP_DIRECT	GO:0000226~microtubule cytoskeleton organization	15	0.572738	0.078549	ENSG00000128487, ENSG00000131711, ENSG00000072832, ENSG00000130479, ENSG00000114999, ENSG00000078018, ENSG00000074054, ENSG00000066427, ENSG00000116871, ENSG00000166483, ENSG00000116141, ENSG00000144824, ENSG00000151914, ENSG00000180834, ENSG00000034677	2217	71	16792	1.60018	1	0.885102	0.871324
GOTERM_BP_DIRECT	GO:0010952~positive regulation of peptidase activity	5	0.190913	0.0811404	ENSG00000105974, ENSG00000142192, ENSG00000115414, ENSG00000163710, ENSG00000157227	2217	13	16792	2.91315	1	0.889204	0.875362
GOTERM_BP_DIRECT	GO:0032026~response to magnesium ion	5	0.190913	0.0811404	ENSG00000110092, ENSG00000164761, ENSG00000135679, ENSG00000144191, ENSG00000137801	2217	13	16792	2.91315	1	0.889204	0.875362
GOTERM_BP_DIRECT	GO:0045088~regulation of innate immune response	5	0.190913	0.0811404	ENSG00000023445, ENSG00000101347, ENSG00000125347, ENSG00000164307, ENSG00000110330	2217	13	16792	2.91315	1	0.889204	0.875362
GOTERM_BP_DIRECT	GO:0045651~positive regulation of macrophage differentiation	5	0.190913	0.0811404	ENSG00000137275, ENSG00000184371, ENSG00000128342, ENSG00000173334, ENSG00000168040	2217	13	16792	2.91315	1	0.889204	0.875362
GOTERM_BP_DIRECT	GO:0086012~membrane depolarization during cardiac muscle cell action potential	5	0.190913	0.0811404	ENSG00000166257, ENSG00000105711, ENSG00000123700, ENSG00000099822, ENSG00000153956	2217	13	16792	2.91315	1	0.889204	0.875362
GOTERM_BP_DIRECT	GO:0060334~regulation of interferon-gamma-mediated signaling pathway	5	0.190913	0.0811404	ENSG00000115415, ENSG00000027697, ENSG00000159128, ENSG00000184557, ENSG00000162434	2217	13	16792	2.91315	1	0.889204	0.875362
GOTERM_BP_DIRECT	GO:0050730~regulation of peptidyl-tyrosine phosphorylation	5	0.190913	0.0811404	ENSG00000142166, ENSG00000197461, ENSG00000068971, ENSG00000181284, ENSG00000145431	2217	13	16792	2.91315	1	0.889204	0.875362
GOTERM_BP_DIRECT	GO:0001916~positive regulation of T cell mediated cytotoxicity	5	0.190913	0.0811404	ENSG00000110944, ENSG00000234745, ENSG00000168040, ENSG00000166710, ENSG00000204592	2217	13	16792	2.91315	1	0.889204	0.875362
GOTERM_BP_DIRECT	GO:0060391~positive regulation of SMAD protein import into nucleus	5	0.190913	0.0811404	ENSG00000119699, ENSG00000106799, ENSG00000156574, ENSG00000105329, ENSG00000153071	2217	13	16792	2.91315	1	0.889204	0.875362
GOTERM_BP_DIRECT	GO:0060389~pathway-restricted SMAD protein phosphorylation	5	0.190913	0.0811404	ENSG00000106799, ENSG00000125845, ENSG00000115170, ENSG00000105329, ENSG00000101665	2217	13	16792	2.91315	1	0.889204	0.875362
GOTERM_BP_DIRECT	GO:0060317~cardiac epithelial to mesenchymal transition	5	0.190913	0.0811404	ENSG00000164683, ENSG00000106799, ENSG00000125845, ENSG00000148400, ENSG00000115310	2217	13	16792	2.91315	1	0.889204	0.875362
GOTERM_BP_DIRECT	GO:0043568~positive regulation of insulin-like growth factor receptor signaling pathway	5	0.190913	0.0811404	ENSG00000062038, ENSG00000164976, ENSG00000146674, ENSG00000017427, ENSG00000141753	2217	13	16792	2.91315	1	0.889204	0.875362
GOTERM_BP_DIRECT	GO:0031274~positive regulation of pseudopodium assembly	5	0.190913	0.0811404	ENSG00000164251, ENSG00000128283, ENSG00000149798, ENSG00000167617, ENSG00000070831	2217	13	16792	2.91315	1	0.889204	0.875362
GOTERM_BP_DIRECT	GO:0021819~layer formation in cerebral cortex	5	0.190913	0.0811404	ENSG00000136848, ENSG00000168036, ENSG00000205336, ENSG00000106571, ENSG00000176749	2217	13	16792	2.91315	1	0.889204	0.875362
GOTERM_BP_DIRECT	GO:0000422~mitophagy	9	0.343643	0.0815437	ENSG00000101460, ENSG00000147889, ENSG00000139112, ENSG00000181652, ENSG00000161011, ENSG00000101844, ENSG00000070540, ENSG00000176171, ENSG00000198925	2217	35	16792	1.94765	1	0.891141	0.877269
GOTERM_BP_DIRECT	GO:0036498~IRE1-mediated unfolded protein response	13	0.496373	0.0816361	ENSG00000134109, ENSG00000160789, ENSG00000196396, ENSG00000068971, ENSG00000128590, ENSG00000070540, ENSG00000174851, ENSG00000138674, ENSG00000058262, ENSG00000012232, ENSG00000101199, ENSG00000149428, ENSG00000100196	2217	59	16792	1.66889	1	0.891141	0.877269
GOTERM_BP_DIRECT	GO:0048839~inner ear development	10	0.381825	0.0829305	ENSG00000119699, ENSG00000112319, ENSG00000136280, ENSG00000145824, ENSG00000125845, ENSG00000178573, ENSG00000105329, ENSG00000197324, ENSG00000139292, ENSG00000162889	2217	41	16792	1.84737	1	0.892137	0.87825
GOTERM_BP_DIRECT	GO:0045600~positive regulation of fat cell differentiation	11	0.420008	0.0831906	ENSG00000104332, ENSG00000174705, ENSG00000132170, ENSG00000102802, ENSG00000125845, ENSG00000185650, ENSG00000161642, ENSG00000111186, ENSG00000172216, ENSG00000151014, ENSG00000019549	2217	47	16792	1.77268	1	0.892137	0.87825
GOTERM_BP_DIRECT	GO:0014066~regulation of phosphatidylinositol 3-kinase signaling	16	0.61092	0.0839115	ENSG00000197461, ENSG00000068971, ENSG00000166908, ENSG00000113578, ENSG00000172575, ENSG00000157168, ENSG00000138685, ENSG00000138675, ENSG00000079385, ENSG00000137331, ENSG00000113070, ENSG00000169047, ENSG00000150867, ENSG00000171608, ENSG00000049130, ENSG00000100311	2217	78	16792	1.55368	1	0.892137	0.87825
GOTERM_BP_DIRECT	GO:0034341~response to interferon-gamma	7	0.267278	0.0867222	ENSG00000115919, ENSG00000130303, ENSG00000132109, ENSG00000213886, ENSG00000185885, ENSG00000161921, ENSG00000058262	2217	24	16792	2.20914	1	0.892137	0.87825
GOTERM_BP_DIRECT	GO:0030511~positive regulation of transforming growth factor beta receptor signaling pathway	7	0.267278	0.0867222	ENSG00000140682, ENSG00000141052, ENSG00000153071, ENSG00000147883, ENSG00000123159, ENSG00000137801, ENSG00000171236	2217	24	16792	2.20914	1	0.892137	0.87825
GOTERM_BP_DIRECT	GO:0035235~ionotropic glutamate receptor signaling pathway	7	0.267278	0.0867222	ENSG00000116032, ENSG00000182771, ENSG00000142192, ENSG00000164418, ENSG00000176749, ENSG00000125675, ENSG00000105464	2217	24	16792	2.20914	1	0.892137	0.87825
GOTERM_BP_DIRECT	GO:0070371~ERK1 and ERK2 cascade	7	0.267278	0.0867222	ENSG00000168961, ENSG00000120659, ENSG00000185650, ENSG00000138448, ENSG00000180914, ENSG00000171522, ENSG00000017427	2217	24	16792	2.20914	1	0.892137	0.87825
GOTERM_BP_DIRECT	GO:0060364~frontal suture morphogenesis	3	0.114548	0.0869949	ENSG00000119699, ENSG00000105329, ENSG00000106571	2217	4	16792	5.68065	1	0.892137	0.87825
GOTERM_BP_DIRECT	GO:0072574~hepatocyte proliferation	3	0.114548	0.0869949	ENSG00000117707, ENSG00000172216, ENSG00000163235	2217	4	16792	5.68065	1	0.892137	0.87825
GOTERM_BP_DIRECT	GO:0032417~positive regulation of sodium:proton antiporter activity	3	0.114548	0.0869949	ENSG00000069696, ENSG00000130402, ENSG00000088992	2217	4	16792	5.68065	1	0.892137	0.87825
GOTERM_BP_DIRECT	GO:0071395~cellular response to jasmonic acid stimulus	3	0.114548	0.0869949	ENSG00000187134, ENSG00000196139, ENSG00000151632	2217	4	16792	5.68065	1	0.892137	0.87825
GOTERM_BP_DIRECT	GO:0071677~positive regulation of mononuclear cell migration	3	0.114548	0.0869949	ENSG00000105329, ENSG00000232810, ENSG00000131981	2217	4	16792	5.68065	1	0.892137	0.87825
GOTERM_BP_DIRECT	GO:0032348~negative regulation of aldosterone biosynthetic process	3	0.114548	0.0869949	ENSG00000125845, ENSG00000050165, ENSG00000112175	2217	4	16792	5.68065	1	0.892137	0.87825
GOTERM_BP_DIRECT	GO:0070232~regulation of T cell apoptotic process	3	0.114548	0.0869949	ENSG00000120217, ENSG00000105639, ENSG00000131981	2217	4	16792	5.68065	1	0.892137	0.87825
GOTERM_BP_DIRECT	GO:0034121~regulation of toll-like receptor signaling pathway	3	0.114548	0.0869949	ENSG00000023445, ENSG00000091831, ENSG00000110330	2217	4	16792	5.68065	1	0.892137	0.87825
GOTERM_BP_DIRECT	GO:0031547~brain-derived neurotrophic factor receptor signaling pathway	3	0.114548	0.0869949	ENSG00000109756, ENSG00000176697, ENSG00000148053	2217	4	16792	5.68065	1	0.892137	0.87825
GOTERM_BP_DIRECT	GO:0002159~desmosome assembly	3	0.114548	0.0869949	ENSG00000184363, ENSG00000173801, ENSG00000057294	2217	4	16792	5.68065	1	0.892137	0.87825
GOTERM_BP_DIRECT	GO:0042482~positive regulation of odontogenesis	3	0.114548	0.0869949	ENSG00000125845, ENSG00000105329, ENSG00000078401	2217	4	16792	5.68065	1	0.892137	0.87825
GOTERM_BP_DIRECT	GO:2000065~negative regulation of cortisol biosynthetic process	3	0.114548	0.0869949	ENSG00000125845, ENSG00000050165, ENSG00000112175	2217	4	16792	5.68065	1	0.892137	0.87825
GOTERM_BP_DIRECT	GO:0072378~blood coagulation, fibrin clot formation	3	0.114548	0.0869949	ENSG00000171560, ENSG00000171564, ENSG00000171557	2217	4	16792	5.68065	1	0.892137	0.87825
GOTERM_BP_DIRECT	GO:0061333~renal tubule morphogenesis	3	0.114548	0.0869949	ENSG00000187498, ENSG00000081189, ENSG00000170873	2217	4	16792	5.68065	1	0.892137	0.87825
GOTERM_BP_DIRECT	GO:0060058~positive regulation of apoptotic process involved in mammary gland involution	3	0.114548	0.0869949	ENSG00000111424, ENSG00000086062, ENSG00000140464	2217	4	16792	5.68065	1	0.892137	0.87825
GOTERM_BP_DIRECT	GO:0061041~regulation of wound healing	3	0.114548	0.0869949	ENSG00000006327, ENSG00000127831, ENSG00000122861	2217	4	16792	5.68065	1	0.892137	0.87825
GOTERM_BP_DIRECT	GO:0048679~regulation of axon regeneration	3	0.114548	0.0869949	ENSG00000136826, ENSG00000142949, ENSG00000102572	2217	4	16792	5.68065	1	0.892137	0.87825
GOTERM_BP_DIRECT	GO:0046464~acylglycerol catabolic process	3	0.114548	0.0869949	ENSG00000074416, ENSG00000100997, ENSG00000140526	2217	4	16792	5.68065	1	0.892137	0.87825
GOTERM_BP_DIRECT	GO:0060842~arterial endothelial cell differentiation	3	0.114548	0.0869949	ENSG00000164683, ENSG00000148400, ENSG00000166292	2217	4	16792	5.68065	1	0.892137	0.87825
GOTERM_BP_DIRECT	GO:0003273~cell migration involved in endocardial cushion formation	3	0.114548	0.0869949	ENSG00000166341, ENSG00000148400, ENSG00000019549	2217	4	16792	5.68065	1	0.892137	0.87825
GOTERM_BP_DIRECT	GO:0010668~ectodermal cell differentiation	3	0.114548	0.0869949	ENSG00000091409, ENSG00000169896, ENSG00000131080	2217	4	16792	5.68065	1	0.892137	0.87825
GOTERM_BP_DIRECT	GO:0060129~thyroid-stimulating hormone-secreting cell differentiation	3	0.114548	0.0869949	ENSG00000125845, ENSG00000138685, ENSG00000162552	2217	4	16792	5.68065	1	0.892137	0.87825
GOTERM_BP_DIRECT	GO:0016199~axon midline choice point recognition	3	0.114548	0.0869949	ENSG00000169855, ENSG00000142192, ENSG00000185008	2217	4	16792	5.68065	1	0.892137	0.87825
GOTERM_BP_DIRECT	GO:0043152~induction of bacterial agglutination	3	0.114548	0.0869949	ENSG00000171560, ENSG00000159674, ENSG00000171564	2217	4	16792	5.68065	1	0.892137	0.87825
GOTERM_BP_DIRECT	GO:2000346~negative regulation of hepatocyte proliferation	3	0.114548	0.0869949	ENSG00000079385, ENSG00000109670, ENSG00000072163	2217	4	16792	5.68065	1	0.892137	0.87825
GOTERM_BP_DIRECT	GO:0045351~type I interferon biosynthetic process	3	0.114548	0.0869949	ENSG00000185507, ENSG00000172936, ENSG00000142166	2217	4	16792	5.68065	1	0.892137	0.87825
GOTERM_BP_DIRECT	GO:0055072~iron ion homeostasis	8	0.30546	0.0912367	ENSG00000100292, ENSG00000187045, ENSG00000163975, ENSG00000115107, ENSG00000103415, ENSG00000164647, ENSG00000107819, ENSG00000166710	2217	30	16792	2.01979	1	0.933923	0.919385
GOTERM_BP_DIRECT	GO:0001541~ovarian follicle development	10	0.381825	0.0937846	ENSG00000163083, ENSG00000183770, ENSG00000049130, ENSG00000171552, ENSG00000044115, ENSG00000172216, ENSG00000090339, ENSG00000106003, ENSG00000122641, ENSG00000157227	2217	42	16792	1.80338	1	0.958249	0.943332
GOTERM_BP_DIRECT	GO:0045672~positive regulation of osteoclast differentiation	6	0.229095	0.0950309	ENSG00000110944, ENSG00000184371, ENSG00000120659, ENSG00000232810, ENSG00000163823, ENSG00000155090	2217	19	16792	2.39185	1	0.965687	0.950655
GOTERM_BP_DIRECT	GO:0007520~myoblast fusion	6	0.229095	0.0950309	ENSG00000148848, ENSG00000064309, ENSG00000100345, ENSG00000023902, ENSG00000164093, ENSG00000162909	2217	19	16792	2.39185	1	0.965687	0.950655
GOTERM_BP_DIRECT	GO:0045862~positive regulation of proteolysis	6	0.229095	0.0950309	ENSG00000055163, ENSG00000030110, ENSG00000112378, ENSG00000099992, ENSG00000168040, ENSG00000119401	2217	19	16792	2.39185	1	0.965687	0.950655
GOTERM_BP_DIRECT	GO:0035335~peptidyl-tyrosine dephosphorylation	19	0.725468	0.0968399	ENSG00000112319, ENSG00000142949, ENSG00000196396, ENSG00000112245, ENSG00000064655, ENSG00000152894, ENSG00000116675, ENSG00000132334, ENSG00000152104, ENSG00000154127, ENSG00000138166, ENSG00000144724, ENSG00000084112, ENSG00000167065, ENSG00000164086, ENSG00000143507, ENSG00000184545, ENSG00000070778, ENSG00000108861	2217	99	16792	1.45363	1	0.982284	0.966993
GOTERM_BP_DIRECT	GO:0043524~negative regulation of neuron apoptotic process	24	0.91638	0.0979313	ENSG00000132688, ENSG00000107731, ENSG00000100292, ENSG00000176697, ENSG00000154153, ENSG00000148053, ENSG00000159388, ENSG00000174775, ENSG00000171552, ENSG00000172216, ENSG00000134259, ENSG00000175505, ENSG00000174405, ENSG00000080815, ENSG00000119699, ENSG00000166333, ENSG00000023909, ENSG00000168621, ENSG00000001084, ENSG00000162490, ENSG00000081189, ENSG00000108691, ENSG00000164418, ENSG0000…	2217	132	16792	1.37713	1	0.991554	0.97612
GOTERM_BP_DIRECT	GO:0045892~negative regulation of transcription, DNA-templated	77	2.94005	0.0989093	ENSG00000105993, ENSG00000069011, ENSG00000130758, ENSG00000178935, ENSG00000069812, ENSG00000117139, ENSG00000132376, ENSG00000171940, ENSG00000196843, ENSG00000141497, ENSG00000140320, ENSG00000132170, ENSG00000125845, ENSG00000183770, ENSG00000153071, ENSG00000050165, ENSG00000148400, ENSG00000162552, ENSG00000163565, ENSG00000155090, ENSG00000104332, ENSG00000153266, ENSG00000136826, ENSG0000…	2217	499	16792	1.16876	1	0.998734	0.983188
