# Supplementary material for: Modeling fibrotic alveolar transitional cells with pluripotent stem cell-derived alveolar organoids
Source: Life Sci Alliance. 2023 May 25;6(8):e202201853. doi: 10.26508/lsa.202201853 (PMC10213712; doi:10.26508/lsa.202201853)
Supplement: Supplementary file 4 [file LSA-2022-01853_SdataF2.4.xlsx]

## Sheet: SdataF2.4
Category	Term	Count	%	PValue	Genes	List Total	Pop Hits	Pop Total	Fold Enrichment	Bonferroni	Benjamini	FDR
GOTERM_CC_DIRECT	GO:0005925~focal adhesion	132	5.04009	1.78705e-26	ENSG00000162704, ENSG00000128591, ENSG00000147394, ENSG00000135046, ENSG00000164171, ENSG00000084733, ENSG00000120913, ENSG00000100345, ENSG00000126458, ENSG00000130429, ENSG00000101311, ENSG00000086991, ENSG00000145012, ENSG00000106683, ENSG00000070831, ENSG00000079308, ENSG00000013016, ENSG00000162434, ENSG00000131016, ENSG00000099812, ENSG00000130202, ENSG00000075624, ENSG00000072110, ENSG0000…	2360	391	18224	2.60693	1.32956e-23	1.32956e-23	1.20804e-23
GOTERM_CC_DIRECT	GO:0070062~extracellular exosome	526	20.084	1.1189e-21	ENSG00000042493, ENSG00000181467, ENSG00000240764, ENSG00000162704, ENSG00000103855, ENSG00000170454, ENSG00000276966, ENSG00000167165, ENSG00000100345, ENSG00000127824, ENSG00000070831, ENSG00000100100, ENSG00000182326, ENSG00000170465, ENSG00000171557, ENSG00000171314, ENSG00000046604, ENSG00000138600, ENSG00000172757, ENSG00000014914, ENSG00000124208, ENSG00000124209, ENSG00000151914, ENSG0000…	2360	2811	18224	1.44496	8.32463e-19	4.16231e-19	3.78189e-19
GOTERM_CC_DIRECT	GO:0005886~plasma membrane	712	27.1859	2.03933e-20	ENSG00000181467, ENSG00000240764, ENSG00000139926, ENSG00000137501, ENSG00000180370, ENSG00000166073, ENSG00000170214, ENSG00000196839, ENSG00000134470, ENSG00000131080, ENSG00000253846, ENSG00000134590, ENSG00000100345, ENSG00000148400, ENSG00000145012, ENSG00000070831, ENSG00000100100, ENSG00000143061, ENSG00000157103, ENSG00000134247, ENSG00000137872, ENSG00000171557, ENSG00000158315, ENSG0000…	2360	4121	18224	1.33416	1.51726e-17	5.05753e-18	4.59528e-18
GOTERM_CC_DIRECT	GO:0005913~cell-cell adherens junction	100	3.81825	2.48773e-17	ENSG00000133789, ENSG00000042493, ENSG00000105355, ENSG00000134755, ENSG00000182718, ENSG00000135046, ENSG00000180370, ENSG00000214517, ENSG00000115310, ENSG00000135048, ENSG00000084733, ENSG00000100345, ENSG00000128641, ENSG00000130202, ENSG00000196396, ENSG00000104419, ENSG00000158710, ENSG00000137073, ENSG00000091409, ENSG00000062038, ENSG00000101665, ENSG00000254087, ENSG00000101421, ENSG0000…	2360	323	18224	2.39072	1.85087e-14	4.62717e-15	4.20426e-15
GOTERM_CC_DIRECT	GO:0001725~stress fiber	33	1.26002	1.34322e-15	ENSG00000105357, ENSG00000099204, ENSG00000167460, ENSG00000065534, ENSG00000138758, ENSG00000064666, ENSG00000197879, ENSG00000196923, ENSG00000166333, ENSG00000120913, ENSG00000100345, ENSG00000101335, ENSG00000162458, ENSG00000164877, ENSG00000086991, ENSG00000050405, ENSG00000130402, ENSG00000072110, ENSG00000173210, ENSG00000154330, ENSG00000162738, ENSG00000078114, ENSG00000136068, ENSG0000…	2360	54	18224	4.71902	9.91207e-13	1.99871e-13	1.81604e-13
GOTERM_CC_DIRECT	GO:0005615~extracellular space	272	10.3856	1.01999e-14	ENSG00000153551, ENSG00000077238, ENSG00000113657, ENSG00000137745, ENSG00000154764, ENSG00000141574, ENSG00000196839, ENSG00000144724, ENSG00000134470, ENSG00000185033, ENSG00000187210, ENSG00000099937, ENSG00000100342, ENSG00000101670, ENSG00000075624, ENSG00000072110, ENSG00000099139, ENSG00000197249, ENSG00000171557, ENSG00000038427, ENSG00000184292, ENSG00000163131, ENSG00000172757, ENSG0000…	2360	1347	18224	1.55931	7.59925e-12	1.26479e-12	1.14919e-12
GOTERM_CC_DIRECT	GO:0031012~extracellular matrix	85	3.24551	1.04052e-12	ENSG00000158406, ENSG00000108821, ENSG00000049323, ENSG00000130635, ENSG00000182718, ENSG00000134871, ENSG00000120708, ENSG00000119681, ENSG00000139329, ENSG00000137745, ENSG00000173801, ENSG00000116962, ENSG00000140682, ENSG00000164176, ENSG00000276966, ENSG00000187498, ENSG00000166670, ENSG00000125966, ENSG00000100345, ENSG00000135919, ENSG00000130508, ENSG00000087245, ENSG00000163520, ENSG0000…	2360	296	18224	2.21748	7.74133e-10	1.10592e-10	1.00484e-10
GOTERM_CC_DIRECT	GO:0005856~cytoskeleton	94	3.58916	1.31418e-10	ENSG00000133789, ENSG00000155254, ENSG00000139926, ENSG00000173166, ENSG00000128591, ENSG00000119283, ENSG00000152503, ENSG00000105639, ENSG00000243156, ENSG00000152229, ENSG00000173801, ENSG00000196526, ENSG00000247596, ENSG00000152104, ENSG00000140682, ENSG00000061656, ENSG00000082397, ENSG00000120318, ENSG00000109790, ENSG00000171617, ENSG00000169067, ENSG00000079308, ENSG00000180921, ENSG0000…	2360	371	18224	1.95653	9.77746e-08	1.22218e-08	1.11048e-08
GOTERM_CC_DIRECT	GO:0016020~membrane	380	14.5094	4.3784e-10	ENSG00000175582, ENSG00000105355, ENSG00000181467, ENSG00000105357, ENSG00000153551, ENSG00000158683, ENSG00000137501, ENSG00000110025, ENSG00000197930, ENSG00000077232, ENSG00000152229, ENSG00000176438, ENSG00000183092, ENSG00000196839, ENSG00000276966, ENSG00000185033, ENSG00000187210, ENSG00000100345, ENSG00000100344, ENSG00000100341, ENSG00000106683, ENSG00000070831, ENSG00000184743, ENSG0000…	2360	2200	18224	1.33381	3.25753e-07	3.61948e-08	3.28867e-08
GOTERM_CC_DIRECT	GO:0005578~proteinaceous extracellular matrix	73	2.78732	6.43696e-10	ENSG00000049323, ENSG00000130635, ENSG00000135925, ENSG00000136378, ENSG00000113578, ENSG00000120708, ENSG00000119681, ENSG00000139329, ENSG00000137745, ENSG00000154764, ENSG00000185070, ENSG00000162551, ENSG00000166670, ENSG00000125966, ENSG00000049089, ENSG00000164932, ENSG00000130508, ENSG00000087245, ENSG00000163520, ENSG00000162552, ENSG00000104332, ENSG00000105664, ENSG00000197565, ENSG0000…	2360	268	18224	2.10339	4.7891e-07	4.7891e-08	4.35139e-08
GOTERM_CC_DIRECT	GO:0015629~actin cytoskeleton	63	2.4055	8.64797e-10	ENSG00000039560, ENSG00000162704, ENSG00000147394, ENSG00000044115, ENSG00000173801, ENSG00000196923, ENSG00000183091, ENSG00000120913, ENSG00000100345, ENSG00000130429, ENSG00000134909, ENSG00000143079, ENSG00000035403, ENSG00000154553, ENSG00000050405, ENSG00000130402, ENSG00000197321, ENSG00000128283, ENSG00000108819, ENSG00000136068, ENSG00000171992, ENSG00000172757, ENSG00000158195, ENSG0000…	2360	218	18224	2.2316	6.43409e-07	5.84917e-08	5.31457e-08
GOTERM_CC_DIRECT	GO:0030027~lamellipodium	51	1.94731	1.11217e-09	ENSG00000133789, ENSG00000173166, ENSG00000113657, ENSG00000065534, ENSG00000044115, ENSG00000154447, ENSG00000247596, ENSG00000149091, ENSG00000146426, ENSG00000120318, ENSG00000142669, ENSG00000173210, ENSG00000180263, ENSG00000108819, ENSG00000078098, ENSG00000085733, ENSG00000158195, ENSG00000075618, ENSG00000127831, ENSG00000163697, ENSG00000111859, ENSG00000099204, ENSG00000039068, ENSG0000…	2360	160	18224	2.4614	8.27451e-07	6.89542e-08	6.2652e-08
GOTERM_CC_DIRECT	GO:0045121~membrane raft	60	2.29095	1.63837e-09	ENSG00000174130, ENSG00000181467, ENSG00000107731, ENSG00000152661, ENSG00000179820, ENSG00000155254, ENSG00000182718, ENSG00000155252, ENSG00000114423, ENSG00000162909, ENSG00000003402, ENSG00000118432, ENSG00000155974, ENSG00000142867, ENSG00000035403, ENSG00000165029, ENSG00000140564, ENSG00000106799, ENSG00000137713, ENSG00000110330, ENSG00000171867, ENSG00000137275, ENSG00000164305, ENSG0000…	2360	206	18224	2.24914	1.21895e-06	9.37653e-08	8.51954e-08
GOTERM_CC_DIRECT	GO:0009986~cell surface	120	4.5819	2.73392e-09	ENSG00000182718, ENSG00000196562, ENSG00000136378, ENSG00000135046, ENSG00000164171, ENSG00000154764, ENSG00000079385, ENSG00000113494, ENSG00000196839, ENSG00000148400, ENSG00000162552, ENSG00000079308, ENSG00000168899, ENSG00000101670, ENSG00000130202, ENSG00000106799, ENSG00000108219, ENSG00000143061, ENSG00000138448, ENSG00000204381, ENSG00000134247, ENSG00000157103, ENSG00000111186, ENSG0000…	2360	542	18224	1.70968	2.03403e-06	1.45288e-07	1.32009e-07
GOTERM_CC_DIRECT	GO:0048471~perinuclear region of cytoplasm	132	5.04009	6.0568e-09	ENSG00000105993, ENSG00000024422, ENSG00000182718, ENSG00000174775, ENSG00000180370, ENSG00000164171, ENSG00000154645, ENSG00000138674, ENSG00000151014, ENSG00000164850, ENSG00000117298, ENSG00000163083, ENSG00000132170, ENSG00000008294, ENSG00000169981, ENSG00000158286, ENSG00000107130, ENSG00000086991, ENSG00000168899, ENSG00000165029, ENSG00000013016, ENSG00000164733, ENSG00000128641, ENSG0000…	2360	621	18224	1.6414	4.50625e-06	3.00417e-07	2.7296e-07
GOTERM_CC_DIRECT	GO:0005829~cytosol	527	20.1222	3.45762e-08	ENSG00000181467, ENSG00000162704, ENSG00000263528, ENSG00000113657, ENSG00000180370, ENSG00000110025, ENSG00000196839, ENSG00000132170, ENSG00000100345, ENSG00000148400, ENSG00000127824, ENSG00000101311, ENSG00000100341, ENSG00000070831, ENSG00000171552, ENSG00000067208, ENSG00000171314, ENSG00000124208, ENSG00000151914, ENSG00000056558, ENSG00000101665, ENSG00000178184, ENSG00000177096, ENSG0000…	2360	3315	18224	1.22761	2.57243e-05	1.60779e-06	1.46084e-06
GOTERM_CC_DIRECT	GO:0005911~cell-cell junction	50	1.90913	4.63789e-08	ENSG00000179820, ENSG00000109756, ENSG00000182718, ENSG00000044115, ENSG00000173801, ENSG00000196923, ENSG00000185070, ENSG00000138594, ENSG00000082397, ENSG00000079385, ENSG00000084733, ENSG00000070831, ENSG00000035403, ENSG00000150471, ENSG00000130202, ENSG00000130402, ENSG00000156299, ENSG00000156453, ENSG00000072110, ENSG00000170421, ENSG00000134762, ENSG00000152894, ENSG00000046604, ENSG0000…	2360	172	18224	2.24478	3.45053e-05	2.02976e-06	1.84424e-06
GOTERM_CC_DIRECT	GO:0000139~Golgi membrane	123	4.69645	7.32626e-08	ENSG00000175582, ENSG00000137502, ENSG00000174775, ENSG00000138674, ENSG00000249853, ENSG00000164574, ENSG00000164850, ENSG00000084733, ENSG00000134470, ENSG00000154917, ENSG00000157350, ENSG00000187210, ENSG00000123989, ENSG00000148400, ENSG00000134909, ENSG00000070831, ENSG00000152056, ENSG00000070731, ENSG00000136542, ENSG00000197249, ENSG00000176720, ENSG00000159128, ENSG00000164342, ENSG0000…	2360	591	18224	1.60712	5.45059e-05	3.02819e-06	2.75142e-06
GOTERM_CC_DIRECT	GO:0005737~cytoplasm	784	29.9351	1.35855e-07	ENSG00000137628, ENSG00000263528, ENSG00000113657, ENSG00000196839, ENSG00000034510, ENSG00000108061, ENSG00000100345, ENSG00000100344, ENSG00000145012, ENSG00000100341, ENSG00000070831, ENSG00000126970, ENSG00000143079, ENSG00000275993, ENSG00000112319, ENSG00000180263, ENSG00000112559, ENSG00000171552, ENSG00000137872, ENSG00000134369, ENSG00000157227, ENSG00000171314, ENSG00000175906, ENSG0000…	2360	5222	18224	1.15934	0.000101071	5.31981e-06	4.83359e-06
GOTERM_CC_DIRECT	GO:0005887~integral component of plasma membrane	249	9.50745	1.59533e-07	ENSG00000174130, ENSG00000077238, ENSG00000099822, ENSG00000136531, ENSG00000166073, ENSG00000118432, ENSG00000150048, ENSG00000170214, ENSG00000144724, ENSG00000138271, ENSG00000131080, ENSG00000167723, ENSG00000130202, ENSG00000175591, ENSG00000092068, ENSG00000169908, ENSG00000171551, ENSG00000135452, ENSG00000157103, ENSG00000137872, ENSG00000243364, ENSG00000157227, ENSG00000184292, ENSG0000…	2360	1415	18224	1.35886	0.000118685	5.93463e-06	5.39221e-06
GOTERM_CC_DIRECT	GO:0005576~extracellular region	274	10.462	7.07721e-07	ENSG00000110944, ENSG00000095587, ENSG00000049323, ENSG00000137745, ENSG00000154764, ENSG00000276966, ENSG00000157350, ENSG00000148400, ENSG00000127824, ENSG00000099937, ENSG00000100342, ENSG00000101670, ENSG00000182326, ENSG00000072110, ENSG00000197249, ENSG00000134363, ENSG00000171557, ENSG00000243364, ENSG00000038427, ENSG00000163131, ENSG00000121858, ENSG00000183087, ENSG00000113083, ENSG0000…	2360	1610	18224	1.31418	0.000526406	2.50735e-05	2.27819e-05
GOTERM_CC_DIRECT	GO:0001726~ruffle	30	1.14548	1.65764e-06	ENSG00000161638, ENSG00000179820, ENSG00000115935, ENSG00000130779, ENSG00000182718, ENSG00000196586, ENSG00000197535, ENSG00000132376, ENSG00000170873, ENSG00000197956, ENSG00000196923, ENSG00000120318, ENSG00000100345, ENSG00000088992, ENSG00000050820, ENSG00000146192, ENSG00000072110, ENSG00000150093, ENSG00000180263, ENSG00000006327, ENSG00000163191, ENSG00000136167, ENSG00000204381, ENSG0000…	2360	90	18224	2.57401	0.00123253	5.60584e-05	5.09348e-05
GOTERM_CC_DIRECT	GO:0030018~Z disc	35	1.33639	3.83812e-06	ENSG00000105993, ENSG00000128591, ENSG00000156804, ENSG00000134775, ENSG00000173801, ENSG00000171345, ENSG00000183091, ENSG00000166257, ENSG00000168036, ENSG00000101335, ENSG00000162614, ENSG00000154553, ENSG00000109846, ENSG00000130402, ENSG00000072110, ENSG00000154330, ENSG00000170681, ENSG00000167196, ENSG00000078114, ENSG00000136068, ENSG00000171992, ENSG00000170421, ENSG00000115641, ENSG0000…	2360	118	18224	2.29043	0.0028515	0.000124155	0.000112807
GOTERM_CC_DIRECT	GO:0016021~integral component of membrane	755	28.8278	1.93644e-05	ENSG00000240764, ENSG00000179023, ENSG00000077238, ENSG00000103855, ENSG00000158683, ENSG00000136531, ENSG00000137745, ENSG00000077232, ENSG00000166073, ENSG00000137500, ENSG00000134470, ENSG00000131080, ENSG00000253846, ENSG00000011638, ENSG00000167165, ENSG00000148400, ENSG00000100344, ENSG00000100100, ENSG00000184743, ENSG00000100342, ENSG00000181458, ENSG00000070731, ENSG00000099139, ENSG0000…	2360	5163	18224	1.12921	0.0143039	0.000600295	0.000545429
GOTERM_CC_DIRECT	GO:0032587~ruffle membrane	26	0.992745	2.47848e-05	ENSG00000161638, ENSG00000107679, ENSG00000196586, ENSG00000132376, ENSG00000228741, ENSG00000177106, ENSG00000197879, ENSG00000127603, ENSG00000088992, ENSG00000259207, ENSG00000101311, ENSG00000131037, ENSG00000146192, ENSG00000156299, ENSG00000150093, ENSG00000108819, ENSG00000138448, ENSG00000136002, ENSG00000136167, ENSG00000023902, ENSG00000078098, ENSG00000065989, ENSG00000141068, ENSG0000…	2360	82	18224	2.44845	0.0182711	0.000737595	0.00067018
GOTERM_CC_DIRECT	GO:0030424~axon	52	1.98549	2.60736e-05	ENSG00000105357, ENSG00000099864, ENSG00000015592, ENSG00000136531, ENSG00000198742, ENSG00000138758, ENSG00000118432, ENSG00000164099, ENSG00000164850, ENSG00000107130, ENSG00000126214, ENSG00000127870, ENSG00000150471, ENSG00000134769, ENSG00000103042, ENSG00000157103, ENSG00000158555, ENSG00000152894, ENSG00000174469, ENSG00000197959, ENSG00000151835, ENSG00000151914, ENSG00000106078, ENSG0000…	2360	222	18224	1.80876	0.0192121	0.000746106	0.000677914
GOTERM_CC_DIRECT	GO:0031093~platelet alpha granule lumen	20	0.76365	3.36829e-05	ENSG00000197461, ENSG00000130402, ENSG00000072110, ENSG00000171560, ENSG00000110799, ENSG00000105329, ENSG00000196136, ENSG00000142192, ENSG00000171564, ENSG00000197249, ENSG00000137801, ENSG00000115414, ENSG00000171557, ENSG00000119699, ENSG00000116260, ENSG00000183087, ENSG00000100311, ENSG00000017427, ENSG00000102265, ENSG00000106366	2360	55	18224	2.80801	0.0247491	0.000928152	0.000843321
GOTERM_CC_DIRECT	GO:0005794~Golgi apparatus	153	5.84192	3.50969e-05	ENSG00000174130, ENSG00000175582, ENSG00000105355, ENSG00000135604, ENSG00000130270, ENSG00000174775, ENSG00000197535, ENSG00000067715, ENSG00000276600, ENSG00000141574, ENSG00000164850, ENSG00000084733, ENSG00000132170, ENSG00000154917, ENSG00000107130, ENSG00000168899, ENSG00000197093, ENSG00000165029, ENSG00000101670, ENSG00000107249, ENSG00000070731, ENSG00000099139, ENSG00000180263, ENSG0000…	2360	863	18224	1.36903	0.0257745	0.000932574	0.000847338
GOTERM_CC_DIRECT	GO:0005604~basement membrane	25	0.954563	3.81461e-05	ENSG00000179403, ENSG00000130635, ENSG00000182718, ENSG00000120708, ENSG00000134013, ENSG00000041982, ENSG00000116962, ENSG00000187498, ENSG00000105290, ENSG00000102265, ENSG00000177697, ENSG00000065320, ENSG00000091136, ENSG00000215018, ENSG00000169031, ENSG00000091409, ENSG00000166147, ENSG00000159166, ENSG00000151914, ENSG00000182871, ENSG00000091986, ENSG00000100234, ENSG00000053747, ENSG0000…	2360	79	18224	2.44368	0.0279823	0.000973886	0.000884875
GOTERM_CC_DIRECT	GO:0043034~costamere	11	0.420008	3.92696e-05	ENSG00000166333, ENSG00000154330, ENSG00000197321, ENSG00000128591, ENSG00000182253, ENSG00000178209, ENSG00000185567, ENSG00000124942, ENSG00000170421, ENSG00000171345, ENSG00000035403	2360	19	18224	4.47065	0.0287945	0.000973886	0.000884875
GOTERM_CC_DIRECT	GO:0008305~integrin complex	13	0.496373	5.68228e-05	ENSG00000161638, ENSG00000137809, ENSG00000150093, ENSG00000105855, ENSG00000138448, ENSG00000132470, ENSG00000164171, ENSG00000005884, ENSG00000091409, ENSG00000082781, ENSG00000169896, ENSG00000100345, ENSG00000259207	2360	27	18224	3.71802	0.0413962	0.00136375	0.0012391
GOTERM_CC_DIRECT	GO:0031410~cytoplasmic vesicle	53	2.02367	6.31526e-05	ENSG00000175582, ENSG00000134755, ENSG00000099864, ENSG00000155252, ENSG00000138119, ENSG00000099785, ENSG00000164099, ENSG00000139289, ENSG00000134470, ENSG00000154917, ENSG00000054523, ENSG00000127666, ENSG00000126214, ENSG00000101460, ENSG00000132109, ENSG00000196396, ENSG00000179674, ENSG00000164938, ENSG00000072274, ENSG00000097033, ENSG00000157227, ENSG00000186792, ENSG00000151914, ENSG0000…	2360	235	18224	1.74157	0.0459002	0.0014683	0.0013341
GOTERM_CC_DIRECT	GO:0005938~cell cortex	33	1.26002	6.85606e-05	ENSG00000105499, ENSG00000111859, ENSG00000105974, ENSG00000039560, ENSG00000113758, ENSG00000171560, ENSG00000182718, ENSG00000113578, ENSG00000196586, ENSG00000171564, ENSG00000115216, ENSG00000058085, ENSG00000112782, ENSG00000168036, ENSG00000187239, ENSG00000134909, ENSG00000162458, ENSG00000099812, ENSG00000131016, ENSG00000182809, ENSG00000136068, ENSG00000074054, ENSG00000171557, ENSG0000…	2360	123	18224	2.07177	0.0497316	0.00154573	0.00140445
GOTERM_CC_DIRECT	GO:0030057~desmosome	12	0.45819	8.23465e-05	ENSG00000134757, ENSG00000134755, ENSG00000096696, ENSG00000081277, ENSG00000184363, ENSG00000112378, ENSG00000086062, ENSG00000173801, ENSG00000204539, ENSG00000057294, ENSG00000134762, ENSG00000046604	2360	24	18224	3.86102	0.0594292	0.00180194	0.00163724
GOTERM_CC_DIRECT	GO:0014704~intercalated disc	17	0.649103	9.34998e-05	ENSG00000151320, ENSG00000134755, ENSG00000096696, ENSG00000090020, ENSG00000152661, ENSG00000105711, ENSG00000150093, ENSG00000154330, ENSG00000044115, ENSG00000057294, ENSG00000173801, ENSG00000046604, ENSG00000170558, ENSG00000123700, ENSG00000164983, ENSG00000168899, ENSG00000104067	2360	45	18224	2.91721	0.0672024	0.00198754	0.00180588
GOTERM_CC_DIRECT	GO:0005622~intracellular	219	8.36197	9.71011e-05	ENSG00000185947, ENSG00000162949, ENSG00000175582, ENSG00000065491, ENSG00000111912, ENSG00000095585, ENSG00000137501, ENSG00000137502, ENSG00000150048, ENSG00000119401, ENSG00000276600, ENSG00000131080, ENSG00000104140, ENSG00000070831, ENSG00000079308, ENSG00000275993, ENSG00000155962, ENSG00000172081, ENSG00000106799, ENSG00000196152, ENSG00000072110, ENSG00000112559, ENSG00000171435, ENSG0000…	2360	1332	18224	1.26961	0.0696986	0.00200676	0.00182334
GOTERM_CC_DIRECT	GO:0005912~adherens junction	18	0.687285	0.000108308	ENSG00000108819, ENSG00000028203, ENSG00000044115, ENSG00000110400, ENSG00000057294, ENSG00000172602, ENSG00000152894, ENSG00000136830, ENSG00000079385, ENSG00000138771, ENSG00000168036, ENSG00000157483, ENSG00000182253, ENSG00000148400, ENSG00000165757, ENSG00000147027, ENSG00000035403, ENSG00000101384	2360	50	18224	2.77993	0.0774239	0.00217787	0.00197881
GOTERM_CC_DIRECT	GO:0005884~actin filament	21	0.801833	0.000135588	ENSG00000172380, ENSG00000158856, ENSG00000128641, ENSG00000071127, ENSG00000072110, ENSG00000128340, ENSG00000115935, ENSG00000198467, ENSG00000167460, ENSG00000136167, ENSG00000176105, ENSG00000197535, ENSG00000196924, ENSG00000085733, ENSG00000144648, ENSG00000143549, ENSG00000106078, ENSG00000102024, ENSG00000104142, ENSG00000167657, ENSG00000129116	2360	65	18224	2.49481	0.0959623	0.00265467	0.00241204
GOTERM_CC_DIRECT	GO:0005768~endosome	50	1.90913	0.000152669	ENSG00000105355, ENSG00000131323, ENSG00000132932, ENSG00000140839, ENSG00000182718, ENSG00000155252, ENSG00000135046, ENSG00000075651, ENSG00000213625, ENSG00000139722, ENSG00000166311, ENSG00000084733, ENSG00000117298, ENSG00000109079, ENSG00000164136, ENSG00000123384, ENSG00000185359, ENSG00000106799, ENSG00000106636, ENSG00000072274, ENSG00000173926, ENSG00000101421, ENSG00000197081, ENSG0000…	2360	225	18224	1.71601	0.10738	0.00291245	0.00264626
GOTERM_CC_DIRECT	GO:0005789~endoplasmic reticulum membrane	148	5.65101	0.000224195	ENSG00000175582, ENSG00000068366, ENSG00000128590, ENSG00000130270, ENSG00000197930, ENSG00000099785, ENSG00000163082, ENSG00000138674, ENSG00000115310, ENSG00000167600, ENSG00000164850, ENSG00000084733, ENSG00000134470, ENSG00000145817, ENSG00000164054, ENSG00000167165, ENSG00000102007, ENSG00000148400, ENSG00000134909, ENSG00000086991, ENSG00000100344, ENSG00000070831, ENSG00000184743, ENSG0000…	2360	862	18224	1.32582	0.153648	0.00417003	0.0037889
GOTERM_CC_DIRECT	GO:0016328~lateral plasma membrane	18	0.687285	0.000242607	ENSG00000181885, ENSG00000152661, ENSG00000162738, ENSG00000039068, ENSG00000135046, ENSG00000157224, ENSG00000173218, ENSG00000173801, ENSG00000197879, ENSG00000046604, ENSG00000110880, ENSG00000184292, ENSG00000168502, ENSG00000079385, ENSG00000189143, ENSG00000145506, ENSG00000168036, ENSG00000163347	2360	53	18224	2.62258	0.165165	0.00440243	0.00400006
GOTERM_CC_DIRECT	GO:0016342~catenin complex	7	0.267278	0.000276649	ENSG00000170558, ENSG00000168036, ENSG00000039068, ENSG00000101665, ENSG00000044115, ENSG00000110400, ENSG00000173801	2360	9	18224	6.00603	0.186049	0.00490064	0.00445274
GOTERM_CC_DIRECT	GO:0014069~postsynaptic density	42	1.60367	0.000306942	ENSG00000099864, ENSG00000117519, ENSG00000047849, ENSG00000197555, ENSG00000027697, ENSG00000137845, ENSG00000136754, ENSG00000115310, ENSG00000204217, ENSG00000082397, ENSG00000061337, ENSG00000164850, ENSG00000251322, ENSG00000133083, ENSG00000107130, ENSG00000134909, ENSG00000164418, ENSG00000101333, ENSG00000168959, ENSG00000101199, ENSG00000176171, ENSG00000158856, ENSG00000109846, ENSG0000…	2360	184	18224	1.76264	0.204194	0.00516844	0.00469606
GOTERM_CC_DIRECT	GO:0030426~growth cone	30	1.14548	0.000307706	ENSG00000128872, ENSG00000105357, ENSG00000113758, ENSG00000113657, ENSG00000015592, ENSG00000175203, ENSG00000197535, ENSG00000247596, ENSG00000136754, ENSG00000005884, ENSG00000118432, ENSG00000146426, ENSG00000035862, ENSG00000187672, ENSG00000095713, ENSG00000160991, ENSG00000126214, ENSG00000108819, ENSG00000176788, ENSG00000158555, ENSG00000176749, ENSG00000116852, ENSG00000080815, ENSG0000…	2360	116	18224	1.99708	0.204646	0.00516844	0.00469606
GOTERM_CC_DIRECT	GO:0005765~lysosomal membrane	57	2.1764	0.000312607	ENSG00000106367, ENSG00000136856, ENSG00000182718, ENSG00000155252, ENSG00000075651, ENSG00000099785, ENSG00000117298, ENSG00000153071, ENSG00000123384, ENSG00000104142, ENSG00000164535, ENSG00000196072, ENSG00000152056, ENSG00000047457, ENSG00000176641, ENSG00000241106, ENSG00000213699, ENSG00000005893, ENSG00000138600, ENSG00000114450, ENSG00000189067, ENSG00000164342, ENSG00000119899, ENSG0000…	2360	274	18224	1.60641	0.207542	0.00516844	0.00469606
GOTERM_CC_DIRECT	GO:0030670~phagocytic vesicle membrane	19	0.725468	0.000324599	ENSG00000174130, ENSG00000156675, ENSG00000172780, ENSG00000128340, ENSG00000113732, ENSG00000168461, ENSG00000174125, ENSG00000005893, ENSG00000204592, ENSG00000204525, ENSG00000276600, ENSG00000084733, ENSG00000138772, ENSG00000204642, ENSG00000234745, ENSG00000124209, ENSG00000118508, ENSG00000166710, ENSG00000123595	2360	59	18224	2.48676	0.214583	0.00525003	0.00477019
GOTERM_CC_DIRECT	GO:0030054~cell junction	86	3.2837	0.000367157	ENSG00000128594, ENSG00000180530, ENSG00000130479, ENSG00000175344, ENSG00000155252, ENSG00000105835, ENSG00000138758, ENSG00000044115, ENSG00000067715, ENSG00000117016, ENSG00000155974, ENSG00000061337, ENSG00000079385, ENSG00000164850, ENSG00000196839, ENSG00000107130, ENSG00000134909, ENSG00000130827, ENSG00000101311, ENSG00000164418, ENSG00000106089, ENSG00000087085, ENSG00000183775, ENSG0000…	2360	459	18224	1.44683	0.239071	0.00573526	0.00521107
GOTERM_CC_DIRECT	GO:0042383~sarcolemma	24	0.91638	0.00037344	ENSG00000134769, ENSG00000135636, ENSG00000089060, ENSG00000150093, ENSG00000154330, ENSG00000182718, ENSG00000128591, ENSG00000178209, ENSG00000135046, ENSG00000171345, ENSG00000170421, ENSG00000113396, ENSG00000142156, ENSG00000198929, ENSG00000142583, ENSG00000185043, ENSG00000142173, ENSG00000182253, ENSG00000185567, ENSG00000185896, ENSG00000124942, ENSG00000163069, ENSG00000162520, ENSG0000…	2360	85	18224	2.18034	0.242621	0.00573526	0.00521107
GOTERM_CC_DIRECT	GO:1903561~extracellular vesicle	17	0.649103	0.000377725	ENSG00000197694, ENSG00000067225, ENSG00000171560, ENSG00000171564, ENSG00000072274, ENSG00000137267, ENSG00000114353, ENSG00000170248, ENSG00000010278, ENSG00000164176, ENSG00000142173, ENSG00000078369, ENSG00000140545, ENSG00000135919, ENSG00000163520, ENSG00000106003, ENSG00000035403	2360	50	18224	2.62549	0.245033	0.00573526	0.00521107
GOTERM_CC_DIRECT	GO:0005788~endoplasmic reticulum lumen	43	1.64185	0.000394533	ENSG00000204291, ENSG00000073756, ENSG00000108821, ENSG00000130635, ENSG00000072682, ENSG00000128590, ENSG00000136816, ENSG00000136378, ENSG00000134871, ENSG00000197930, ENSG00000137801, ENSG00000077232, ENSG00000154764, ENSG00000187498, ENSG00000049089, ENSG00000145431, ENSG00000178031, ENSG00000162552, ENSG00000166710, ENSG00000183876, ENSG00000149380, ENSG00000197461, ENSG00000215018, ENSG0000…	2360	192	18224	1.72941	0.254418	0.00587065	0.00533408
GOTERM_CC_DIRECT	GO:0005903~brush border	19	0.725468	0.000408282	ENSG00000128641, ENSG00000050405, ENSG00000105357, ENSG00000177731, ENSG00000130402, ENSG00000072110, ENSG00000092841, ENSG00000178209, ENSG00000136068, ENSG00000197879, ENSG00000176658, ENSG00000101608, ENSG00000157483, ENSG00000115091, ENSG00000100345, ENSG00000123159, ENSG00000187017, ENSG00000127831, ENSG00000035403	2360	60	18224	2.44531	0.262009	0.00595612	0.00541174
GOTERM_CC_DIRECT	GO:0005802~trans-Golgi network	33	1.26002	0.000498204	ENSG00000175582, ENSG00000132932, ENSG00000135823, ENSG00000204070, ENSG00000123240, ENSG00000175040, ENSG00000070540, ENSG00000039068, ENSG00000120708, ENSG00000198324, ENSG00000137502, ENSG00000132376, ENSG00000198925, ENSG00000276600, ENSG00000084733, ENSG00000164850, ENSG00000102109, ENSG00000187210, ENSG00000187239, ENSG00000145730, ENSG00000140564, ENSG00000006125, ENSG00000065923, ENSG0000…	2360	136	18224	1.87373	0.309788	0.00702072	0.00637904
GOTERM_CC_DIRECT	GO:0030175~filopodium	21	0.801833	0.000500132	ENSG00000128641, ENSG00000173166, ENSG00000099864, ENSG00000150093, ENSG00000197102, ENSG00000108819, ENSG00000136167, ENSG00000228741, ENSG00000247596, ENSG00000136754, ENSG00000091409, ENSG00000146426, ENSG00000188042, ENSG00000154380, ENSG00000125753, ENSG00000049130, ENSG00000075618, ENSG00000070831, ENSG00000086062, ENSG00000127831, ENSG00000107796	2360	71	18224	2.28398	0.310778	0.00702072	0.00637904
GOTERM_CC_DIRECT	GO:0031264~death-inducing signaling complex	6	0.229095	0.000605709	ENSG00000137275, ENSG00000164305, ENSG00000168040, ENSG00000026103, ENSG00000003402, ENSG00000102871	2360	7	18224	6.61889	0.362872	0.00817941	0.00743183
GOTERM_CC_DIRECT	GO:0097342~ripoptosome	6	0.229095	0.000605709	ENSG00000129465, ENSG00000137275, ENSG00000168040, ENSG00000003402, ENSG00000127666, ENSG00000003400	2360	7	18224	6.61889	0.362872	0.00817941	0.00743183
GOTERM_CC_DIRECT	GO:0005916~fascia adherens	7	0.267278	0.000615654	ENSG00000170558, ENSG00000096696, ENSG00000152661, ENSG00000072110, ENSG00000168036, ENSG00000173801, ENSG00000035403	2360	10	18224	5.40542	0.367571	0.00817941	0.00743183
GOTERM_CC_DIRECT	GO:0055037~recycling endosome	28	1.06911	0.000663653	ENSG00000123240, ENSG00000105778, ENSG00000198324, ENSG00000197535, ENSG00000198925, ENSG00000155974, ENSG00000084733, ENSG00000164850, ENSG00000092929, ENSG00000141252, ENSG00000144648, ENSG00000164877, ENSG00000125249, ENSG00000167306, ENSG00000156675, ENSG00000136867, ENSG00000150093, ENSG00000123091, ENSG00000072274, ENSG00000135631, ENSG00000167552, ENSG00000232810, ENSG00000054793, ENSG0000…	2360	110	18224	1.96561	0.389771	0.00866242	0.00787069
GOTERM_CC_DIRECT	GO:0043197~dendritic spine	26	0.992745	0.000775032	ENSG00000128594, ENSG00000099864, ENSG00000137825, ENSG00000117519, ENSG00000197555, ENSG00000138758, ENSG00000061337, ENSG00000116661, ENSG00000251322, ENSG00000123700, ENSG00000148908, ENSG00000134909, ENSG00000109846, ENSG00000131711, ENSG00000156299, ENSG00000150093, ENSG00000108819, ENSG00000142192, ENSG00000171992, ENSG00000176749, ENSG00000077063, ENSG00000197959, ENSG00000085733, ENSG0000…	2360	100	18224	2.00773	0.438334	0.00994179	0.00903313
GOTERM_CC_DIRECT	GO:0005769~early endosome	48	1.83276	0.000827014	ENSG00000214357, ENSG00000135823, ENSG00000152661, ENSG00000182718, ENSG00000128052, ENSG00000198720, ENSG00000198324, ENSG00000112245, ENSG00000110047, ENSG00000177409, ENSG00000197535, ENSG00000170113, ENSG00000138670, ENSG00000117298, ENSG00000164850, ENSG00000251201, ENSG00000144648, ENSG00000164251, ENSG00000104142, ENSG00000185359, ENSG00000101670, ENSG00000128641, ENSG00000135956, ENSG0000…	2360	229	18224	1.61859	0.459658	0.0104288	0.00947562
GOTERM_CC_DIRECT	GO:0071944~cell periphery	14	0.534555	0.000851007	ENSG00000128641, ENSG00000196371, ENSG00000111057, ENSG00000261150, ENSG00000171345, ENSG00000116962, ENSG00000005884, ENSG00000163083, ENSG00000145506, ENSG00000185043, ENSG00000168036, ENSG00000258947, ENSG00000186847, ENSG00000128422	2360	39	18224	2.77201	0.469226	0.0105525	0.00958801
GOTERM_CC_DIRECT	GO:0055038~recycling endosome membrane	15	0.572738	0.000919795	ENSG00000181467, ENSG00000024422, ENSG00000198794, ENSG00000110047, ENSG00000104419, ENSG00000176720, ENSG00000065923, ENSG00000115762, ENSG00000135631, ENSG00000084733, ENSG00000100139, ENSG00000072818, ENSG00000125249, ENSG00000140497, ENSG00000013016	2360	44	18224	2.63251	0.495729	0.0112185	0.0101931
GOTERM_CC_DIRECT	GO:0031941~filamentous actin	12	0.45819	0.00117616	ENSG00000196924, ENSG00000128487, ENSG00000034510, ENSG00000113657, ENSG00000158352, ENSG00000196586, ENSG00000167460, ENSG00000187017, ENSG00000101311, ENSG00000075618, ENSG00000197879, ENSG00000184009	2360	31	18224	2.98917	0.58338	0.0141139	0.012824
GOTERM_CC_DIRECT	GO:0030659~cytoplasmic vesicle membrane	30	1.14548	0.00129011	ENSG00000106367, ENSG00000136856, ENSG00000178996, ENSG00000140859, ENSG00000130779, ENSG00000163618, ENSG00000135046, ENSG00000138119, ENSG00000110025, ENSG00000084733, ENSG00000164850, ENSG00000145911, ENSG00000134470, ENSG00000054523, ENSG00000167306, ENSG00000168899, ENSG00000164930, ENSG00000135636, ENSG00000152056, ENSG00000106636, ENSG00000175793, ENSG00000198018, ENSG00000154978, ENSG0000…	2360	126	18224	1.83858	0.617284	0.0152356	0.0138431
GOTERM_CC_DIRECT	GO:0030056~hemidesmosome	6	0.229095	0.00144251	ENSG00000091409, ENSG00000151914, ENSG00000178209, ENSG00000132470, ENSG00000261150, ENSG00000173801	2360	8	18224	5.79153	0.658361	0.0167692	0.0152365
GOTERM_CC_DIRECT	GO:0031982~vesicle	30	1.14548	0.00166914	ENSG00000104783, ENSG00000182718, ENSG00000169682, ENSG00000135046, ENSG00000175203, ENSG00000027697, ENSG00000197535, ENSG00000177106, ENSG00000110880, ENSG00000117298, ENSG00000117472, ENSG00000162695, ENSG00000145113, ENSG00000085063, ENSG00000104312, ENSG00000067225, ENSG00000092841, ENSG00000148175, ENSG00000176788, ENSG00000112175, ENSG00000158710, ENSG00000116675, ENSG00000268104, ENSG0000…	2360	128	18224	1.80985	0.711447	0.0191052	0.017359
GOTERM_CC_DIRECT	GO:0002102~podosome	10	0.381825	0.00210734	ENSG00000116574, ENSG00000085733, ENSG00000174705, ENSG00000071127, ENSG00000197321, ENSG00000167460, ENSG00000136167, ENSG00000075618, ENSG00000148180, ENSG00000129116	2360	24	18224	3.21751	0.791854	0.0237555	0.0215843
GOTERM_CC_DIRECT	GO:0030173~integral component of Golgi membrane	17	0.649103	0.00223666	ENSG00000100060, ENSG00000111728, ENSG00000160613, ENSG00000070731, ENSG00000204070, ENSG00000177076, ENSG00000165915, ENSG00000128274, ENSG00000156671, ENSG00000174851, ENSG00000147408, ENSG00000164023, ENSG00000116260, ENSG00000157350, ENSG00000140557, ENSG00000106003, ENSG00000143641	2360	58	18224	2.26335	0.810987	0.0248369	0.0225669
GOTERM_CC_DIRECT	GO:0009925~basal plasma membrane	11	0.420008	0.00332092	ENSG00000204217, ENSG00000184292, ENSG00000091409, ENSG00000079385, ENSG00000189143, ENSG00000105976, ENSG00000158352, ENSG00000151914, ENSG00000137975, ENSG00000176945, ENSG00000197879	2360	30	18224	2.83141	0.915827	0.0363348	0.0330139
GOTERM_CC_DIRECT	GO:0005587~collagen type IV trimer	5	0.190913	0.00337986	ENSG00000187498, ENSG00000197565, ENSG00000134871, ENSG00000169031, ENSG00000081052	2360	6	18224	6.43503	0.91945	0.0364437	0.0331129
GOTERM_CC_DIRECT	GO:0016327~apicolateral plasma membrane	8	0.30546	0.00358658	ENSG00000181885, ENSG00000168502, ENSG00000189143, ENSG00000099864, ENSG00000184697, ENSG00000173801, ENSG00000164930, ENSG00000104067	2360	17	18224	3.6339	0.93097	0.0381202	0.0346361
GOTERM_CC_DIRECT	GO:0005882~intermediate filament	26	0.992745	0.00466777	ENSG00000096696, ENSG00000152661, ENSG00000160789, ENSG00000130779, ENSG00000111057, ENSG00000026025, ENSG00000205420, ENSG00000197535, ENSG00000057294, ENSG00000173801, ENSG00000170454, ENSG00000171345, ENSG00000135480, ENSG00000186847, ENSG00000167767, ENSG00000132688, ENSG00000135596, ENSG00000170421, ENSG00000170465, ENSG00000081277, ENSG00000169991, ENSG00000151914, ENSG00000182253, ENSG0000…	2360	113	18224	1.77675	0.969222	0.048913	0.0444424
GOTERM_CC_DIRECT	GO:0043025~neuronal cell body	58	2.21459	0.00526022	ENSG00000130479, ENSG00000109756, ENSG00000068366, ENSG00000155252, ENSG00000198742, ENSG00000197535, ENSG00000196839, ENSG00000123700, ENSG00000171617, ENSG00000107175, ENSG00000123384, ENSG00000070831, ENSG00000126214, ENSG00000103042, ENSG00000106636, ENSG00000156299, ENSG00000108819, ENSG00000158555, ENSG00000152894, ENSG00000173898, ENSG00000174469, ENSG00000119699, ENSG00000174938, ENSG0000…	2360	315	18224	1.42183	0.980237	0.0543556	0.0493876
GOTERM_CC_DIRECT	GO:0031091~platelet alpha granule	7	0.267278	0.00554687	ENSG00000188488, ENSG00000171560, ENSG00000110799, ENSG00000171564, ENSG00000135919, ENSG00000137801, ENSG00000171557	2360	14	18224	3.86102	0.984051	0.0565325	0.0513656
GOTERM_CC_DIRECT	GO:0016528~sarcoplasm	5	0.190913	0.00707873	ENSG00000121769, ENSG00000128591, ENSG00000178209, ENSG00000148180, ENSG00000152377	2360	7	18224	5.51574	0.994935	0.07117	0.0646652
GOTERM_CC_DIRECT	GO:0035867~alphav-beta3 integrin-IGF-1-IGF1R complex	4	0.15273	0.00782584	ENSG00000138448, ENSG00000259207, ENSG00000017427, ENSG00000140443	2360	4	18224	7.72203	0.997107	0.0776323	0.0705369
GOTERM_CC_DIRECT	GO:0042612~MHC class I protein complex	6	0.229095	0.00849896	ENSG00000204525, ENSG00000204642, ENSG00000234745, ENSG00000153029, ENSG00000166710, ENSG00000204592	2360	11	18224	4.21202	0.998254	0.0832004	0.075596
GOTERM_CC_DIRECT	GO:0032588~trans-Golgi network membrane	20	0.76365	0.00870905	ENSG00000175582, ENSG00000128641, ENSG00000106367, ENSG00000135823, ENSG00000152056, ENSG00000204070, ENSG00000198794, ENSG00000172780, ENSG00000168461, ENSG00000142192, ENSG00000176720, ENSG00000134851, ENSG00000163472, ENSG00000141252, ENSG00000137177, ENSG00000125966, ENSG00000139292, ENSG00000197081, ENSG00000140497, ENSG00000123595	2360	83	18224	1.86073	0.998508	0.0841498	0.0764587
GOTERM_CC_DIRECT	GO:0005905~clathrin-coated pit	15	0.572738	0.0088616	ENSG00000106367, ENSG00000152056, ENSG00000115977, ENSG00000196586, ENSG00000197324, ENSG00000142192, ENSG00000072274, ENSG00000085733, ENSG00000157191, ENSG00000153071, ENSG00000187239, ENSG00000147650, ENSG00000123384, ENSG00000144476, ENSG00000147852	2360	55	18224	2.10601	0.99867	0.084526	0.0768005
GOTERM_CC_DIRECT	GO:0043209~myelin sheath	31	1.18366	0.0115355	ENSG00000105357, ENSG00000111674, ENSG00000110047, ENSG00000134198, ENSG00000176658, ENSG00000174238, ENSG00000070831, ENSG00000101210, ENSG00000184009, ENSG00000013016, ENSG00000109846, ENSG00000071127, ENSG00000075624, ENSG00000067225, ENSG00000138107, ENSG00000104419, ENSG00000170248, ENSG00000171314, ENSG00000170027, ENSG00000114450, ENSG00000116473, ENSG00000087258, ENSG00000126803, ENSG0000…	2360	152	18224	1.57489	0.999822	0.108638	0.0987091
GOTERM_CC_DIRECT	GO:0031301~integral component of organelle membrane	5	0.190913	0.012715	ENSG00000176641, ENSG00000136156, ENSG00000154978, ENSG00000269113, ENSG00000168899	2360	8	18224	4.82627	0.999927	0.118249	0.107441
GOTERM_CC_DIRECT	GO:0042641~actomyosin	6	0.229095	0.0130349	ENSG00000105357, ENSG00000113758, ENSG00000198752, ENSG00000100345, ENSG00000197535, ENSG00000106089	2360	12	18224	3.86102	0.999942	0.119728	0.108785
GOTERM_CC_DIRECT	GO:0043005~neuron projection	44	1.68003	0.0132932	ENSG00000073756, ENSG00000132359, ENSG00000109756, ENSG00000162704, ENSG00000155252, ENSG00000015592, ENSG00000047849, ENSG00000026025, ENSG00000137449, ENSG00000026103, ENSG00000197535, ENSG00000067715, ENSG00000132376, ENSG00000155974, ENSG00000185070, ENSG00000176658, ENSG00000140022, ENSG00000251322, ENSG00000054523, ENSG00000164877, ENSG00000149256, ENSG00000168959, ENSG00000145730, ENSG0000…	2360	237	18224	1.43363	0.999953	0.120612	0.109588
GOTERM_CC_DIRECT	GO:0005874~microtubule	55	2.10004	0.0144588	ENSG00000101350, ENSG00000130479, ENSG00000105877, ENSG00000130559, ENSG00000137941, ENSG00000158486, ENSG00000168172, ENSG00000137267, ENSG00000084731, ENSG00000054523, ENSG00000127824, ENSG00000187775, ENSG00000126214, ENSG00000101460, ENSG00000099814, ENSG00000156299, ENSG00000078018, ENSG00000129250, ENSG00000104419, ENSG00000134369, ENSG00000080561, ENSG00000197959, ENSG00000165476, ENSG0000…	2360	311	18224	1.36563	0.99998	0.129606	0.117761
GOTERM_CC_DIRECT	GO:0005776~autophagosome	16	0.61092	0.0149654	ENSG00000101460, ENSG00000177169, ENSG00000181652, ENSG00000123240, ENSG00000132109, ENSG00000166908, ENSG00000164938, ENSG00000139112, ENSG00000165861, ENSG00000161011, ENSG00000150867, ENSG00000159363, ENSG00000140941, ENSG00000104142, ENSG00000078804, ENSG00000127666	2360	64	18224	1.93051	0.999987	0.13255	0.120436
GOTERM_CC_DIRECT	GO:0030863~cortical cytoskeleton	8	0.30546	0.0175686	ENSG00000158856, ENSG00000196924, ENSG00000085733, ENSG00000130830, ENSG00000130402, ENSG00000075624, ENSG00000100345, ENSG00000167460	2360	22	18224	2.80801	0.999998	0.15296	0.138979
GOTERM_CC_DIRECT	GO:0033093~Weibel-Palade body	4	0.15273	0.0176808	ENSG00000117298, ENSG00000092929, ENSG00000110799, ENSG00000078401	2360	5	18224	6.17763	0.999998	0.15296	0.138979
GOTERM_CC_DIRECT	GO:0030315~T-tubule	11	0.420008	0.0199162	ENSG00000119699, ENSG00000151320, ENSG00000135636, ENSG00000090020, ENSG00000198929, ENSG00000105711, ENSG00000123700, ENSG00000170385, ENSG00000185567, ENSG00000124942, ENSG00000125744	2360	38	18224	2.23533	1	0.170021	0.154481
GOTERM_CC_DIRECT	GO:0005915~zonula adherens	5	0.190913	0.0205671	ENSG00000130202, ENSG00000140859, ENSG00000044115, ENSG00000173801, ENSG00000035403	2360	9	18224	4.29002	1	0.170021	0.154481
GOTERM_CC_DIRECT	GO:0005577~fibrinogen complex	5	0.190913	0.0205671	ENSG00000171560, ENSG00000171564, ENSG00000137801, ENSG00000115414, ENSG00000171557	2360	9	18224	4.29002	1	0.170021	0.154481
GOTERM_CC_DIRECT	GO:0032432~actin filament bundle	5	0.190913	0.0205671	ENSG00000109846, ENSG00000164877, ENSG00000136167, ENSG00000127831, ENSG00000102024	2360	9	18224	4.29002	1	0.170021	0.154481
GOTERM_CC_DIRECT	GO:0010008~endosome membrane	35	1.33639	0.0213401	ENSG00000185507, ENSG00000105355, ENSG00000186815, ENSG00000024422, ENSG00000178996, ENSG00000263528, ENSG00000070540, ENSG00000090674, ENSG00000113732, ENSG00000213625, ENSG00000136156, ENSG00000110047, ENSG00000099785, ENSG00000139722, ENSG00000134851, ENSG00000134070, ENSG00000251201, ENSG00000141252, ENSG00000134909, ENSG00000185896, ENSG00000104140, ENSG00000100242, ENSG00000127666, ENSG0000…	2360	185	18224	1.46093	1	0.174473	0.158527
GOTERM_CC_DIRECT	GO:0005770~late endosome	25	0.954563	0.0229188	ENSG00000109756, ENSG00000198720, ENSG00000197535, ENSG00000198925, ENSG00000276600, ENSG00000138670, ENSG00000251201, ENSG00000142166, ENSG00000092929, ENSG00000185896, ENSG00000104142, ENSG00000168899, ENSG00000101460, ENSG00000135636, ENSG00000136867, ENSG00000158014, ENSG00000005893, ENSG00000138600, ENSG00000116473, ENSG00000161011, ENSG00000100139, ENSG00000159363, ENSG00000124209, ENSG0000…	2360	122	18224	1.58238	1	0.185344	0.168404
GOTERM_CC_DIRECT	GO:0045335~phagocytic vesicle	11	0.420008	0.0237658	ENSG00000276600, ENSG00000135823, ENSG00000082781, ENSG00000172780, ENSG00000124209, ENSG00000118508, ENSG00000132718, ENSG00000138448, ENSG00000168461, ENSG00000123595, ENSG00000165029	2360	39	18224	2.17801	1	0.190126	0.172749
GOTERM_CC_DIRECT	GO:0000407~pre-autophagosomal structure	7	0.267278	0.0283689	ENSG00000181652, ENSG00000165861, ENSG00000161011, ENSG00000070540, ENSG00000175224, ENSG00000123395, ENSG00000198925	2360	19	18224	2.84496	1	0.224537	0.204015
GOTERM_CC_DIRECT	GO:0016023~cytoplasmic, membrane-bounded vesicle	27	1.03093	0.0305084	ENSG00000123240, ENSG00000178996, ENSG00000176697, ENSG00000099864, ENSG00000115935, ENSG00000128052, ENSG00000196586, ENSG00000134259, ENSG00000197879, ENSG00000155974, ENSG00000173744, ENSG00000139289, ENSG00000154917, ENSG00000187239, ENSG00000162695, ENSG00000126214, ENSG00000158856, ENSG00000179674, ENSG00000158014, ENSG00000072274, ENSG00000140450, ENSG00000145506, ENSG00000147509, ENSG0000…	2360	138	18224	1.51083	1	0.238929	0.217092
GOTERM_CC_DIRECT	GO:0005923~bicellular tight junction	23	0.878198	0.0316862	ENSG00000181885, ENSG00000181467, ENSG00000106799, ENSG00000109756, ENSG00000261150, ENSG00000171992, ENSG00000157224, ENSG00000170324, ENSG00000110092, ENSG00000166025, ENSG00000060138, ENSG00000189143, ENSG00000253958, ENSG00000168036, ENSG00000164877, ENSG00000125753, ENSG00000178184, ENSG00000140832, ENSG00000109099, ENSG00000184697, ENSG00000107201, ENSG00000104067, ENSG00000163347	2360	113	18224	1.57174	1	0.2428	0.220609
GOTERM_CC_DIRECT	GO:0031265~CD95 death-inducing signaling complex	4	0.15273	0.0319817	ENSG00000168040, ENSG00000026103, ENSG00000003402, ENSG00000003400	2360	6	18224	5.14802	1	0.2428	0.220609
GOTERM_CC_DIRECT	GO:0071438~invadopodium membrane	4	0.15273	0.0319817	ENSG00000150093, ENSG00000005884, ENSG00000078098, ENSG00000011422	2360	6	18224	5.14802	1	0.2428	0.220609
GOTERM_CC_DIRECT	GO:0043235~receptor complex	25	0.954563	0.0353976	ENSG00000077238, ENSG00000170075, ENSG00000090674, ENSG00000132470, ENSG00000005884, ENSG00000074181, ENSG00000170775, ENSG00000134250, ENSG00000148400, ENSG00000259207, ENSG00000123384, ENSG00000183775, ENSG00000147852, ENSG00000167723, ENSG00000140443, ENSG00000106799, ENSG00000173391, ENSG00000150093, ENSG00000111424, ENSG00000148053, ENSG00000169252, ENSG00000142192, ENSG00000137275, ENSG0000…	2360	127	18224	1.52009	1	0.262424	0.238439
GOTERM_CC_DIRECT	GO:0005921~gap junction	6	0.229095	0.0354941	ENSG00000110218, ENSG00000136999, ENSG00000152661, ENSG00000113758, ENSG00000188910, ENSG00000104067	2360	15	18224	3.08881	1	0.262424	0.238439
GOTERM_CC_DIRECT	GO:0005871~kinesin complex	13	0.496373	0.0356248	ENSG00000155980, ENSG00000140859, ENSG00000129250, ENSG00000162849, ENSG00000174996, ENSG00000130294, ENSG00000116852, ENSG00000084731, ENSG00000137177, ENSG00000054523, ENSG00000166579, ENSG00000126214, ENSG00000104892	2360	53	18224	1.89408	1	0.262424	0.238439
GOTERM_CC_DIRECT	GO:0009898~cytoplasmic side of plasma membrane	11	0.420008	0.0384841	ENSG00000131323, ENSG00000082512, ENSG00000154330, ENSG00000158352, ENSG00000039068, ENSG00000164949, ENSG00000112245, ENSG00000101421, ENSG00000182389, ENSG00000173801, ENSG00000110330	2360	42	18224	2.02244	1	0.280707	0.255051
GOTERM_CC_DIRECT	GO:0030139~endocytic vesicle	13	0.496373	0.0406013	ENSG00000136848, ENSG00000135636, ENSG00000109756, ENSG00000171680, ENSG00000196586, ENSG00000075651, ENSG00000110047, ENSG00000170873, ENSG00000123159, ENSG00000108691, ENSG00000197081, ENSG00000165029, ENSG00000013016	2360	54	18224	1.85901	1	0.293275	0.266471
GOTERM_CC_DIRECT	GO:0005783~endoplasmic reticulum	125	4.77281	0.0435256	ENSG00000128590, ENSG00000196562, ENSG00000174099, ENSG00000136816, ENSG00000197930, ENSG00000197535, ENSG00000099785, ENSG00000163082, ENSG00000077232, ENSG00000138674, ENSG00000115310, ENSG00000155974, ENSG00000167600, ENSG00000164850, ENSG00000167165, ENSG00000102007, ENSG00000130707, ENSG00000184743, ENSG00000100292, ENSG00000196396, ENSG00000067167, ENSG00000028116, ENSG00000175874, ENSG0000…	2360	828	18224	1.16577	1	0.301043	0.273528
GOTERM_CC_DIRECT	GO:0043296~apical junction complex	5	0.190913	0.0435787	ENSG00000138771, ENSG00000139926, ENSG00000039068, ENSG00000110400, ENSG00000104067	2360	11	18224	3.51002	1	0.301043	0.273528
GOTERM_CC_DIRECT	GO:0044798~nuclear transcription factor complex	5	0.190913	0.0435787	ENSG00000136826, ENSG00000168875, ENSG00000101096, ENSG00000168036, ENSG00000124766	2360	11	18224	3.51002	1	0.301043	0.273528
GOTERM_CC_DIRECT	GO:0030864~cortical actin cytoskeleton	11	0.420008	0.0445393	ENSG00000131236, ENSG00000170558, ENSG00000071127, ENSG00000179820, ENSG00000117394, ENSG00000120913, ENSG00000158352, ENSG00000039068, ENSG00000108819, ENSG00000162909, ENSG00000148180	2360	43	18224	1.9754	1	0.301043	0.273528
GOTERM_CC_DIRECT	GO:0034666~integrin alpha2-beta1 complex	3	0.114548	0.0459161	ENSG00000150093, ENSG00000254087, ENSG00000164171	2360	3	18224	7.72203	1	0.301043	0.273528
GOTERM_CC_DIRECT	GO:0042825~TAP complex	3	0.114548	0.0459161	ENSG00000231925, ENSG00000204267, ENSG00000168394	2360	3	18224	7.72203	1	0.301043	0.273528
GOTERM_CC_DIRECT	GO:0032449~CBM complex	3	0.114548	0.0459161	ENSG00000172175, ENSG00000142867, ENSG00000100065	2360	3	18224	7.72203	1	0.301043	0.273528
GOTERM_CC_DIRECT	GO:0031594~neuromuscular junction	13	0.496373	0.0460436	ENSG00000127561, ENSG00000099617, ENSG00000108639, ENSG00000150093, ENSG00000142192, ENSG00000157168, ENSG00000176749, ENSG00000152377, ENSG00000080815, ENSG00000100345, ENSG00000135919, ENSG00000087085, ENSG00000162520	2360	55	18224	1.82521	1	0.301043	0.273528
GOTERM_CC_DIRECT	GO:0043231~intracellular membrane-bounded organelle	87	3.32188	0.046221	ENSG00000105355, ENSG00000106367, ENSG00000197694, ENSG00000099864, ENSG00000172432, ENSG00000134871, ENSG00000174775, ENSG00000138119, ENSG00000174851, ENSG00000197930, ENSG00000110025, ENSG00000044115, ENSG00000138674, ENSG00000179869, ENSG00000118432, ENSG00000132170, ENSG00000081189, ENSG00000153071, ENSG00000107130, ENSG00000130827, ENSG00000185359, ENSG00000140443, ENSG00000164733, ENSG0000…	2360	558	18224	1.20397	1	0.301043	0.273528
GOTERM_CC_DIRECT	GO:0030673~axolemma	6	0.229095	0.0462792	ENSG00000082397, ENSG00000175344, ENSG00000157168, ENSG00000185008, ENSG00000176658, ENSG00000174469	2360	16	18224	2.89576	1	0.301043	0.273528
GOTERM_CC_DIRECT	GO:0008021~synaptic vesicle	19	0.725468	0.0465322	ENSG00000127561, ENSG00000135604, ENSG00000158109, ENSG00000136856, ENSG00000108639, ENSG00000111450, ENSG00000067715, ENSG00000077063, ENSG00000140022, ENSG00000169213, ENSG00000157680, ENSG00000132718, ENSG00000165637, ENSG00000123159, ENSG00000185896, ENSG00000163630, ENSG00000106089, ENSG00000166579, ENSG00000169427	2360	92	18224	1.59477	1	0.301043	0.273528
GOTERM_CC_DIRECT	GO:0005581~collagen trimer	19	0.725468	0.0465322	ENSG00000204291, ENSG00000108821, ENSG00000130635, ENSG00000215018, ENSG00000197565, ENSG00000137745, ENSG00000169031, ENSG00000204262, ENSG00000124749, ENSG00000142156, ENSG00000144119, ENSG00000142173, ENSG00000113083, ENSG00000164932, ENSG00000049089, ENSG00000182871, ENSG00000081052, ENSG00000122884, ENSG00000102265	2360	92	18224	1.59477	1	0.301043	0.273528
GOTERM_CC_DIRECT	GO:0016460~myosin II complex	4	0.15273	0.050659	ENSG00000101608, ENSG00000105357, ENSG00000158352, ENSG00000100345	2360	7	18224	4.41259	1	0.324809	0.295122
GOTERM_CC_DIRECT	GO:0030425~dendrite	55	2.10004	0.0510789	ENSG00000179546, ENSG00000130479, ENSG00000148680, ENSG00000155252, ENSG00000137941, ENSG00000197930, ENSG00000027697, ENSG00000162909, ENSG00000155974, ENSG00000164099, ENSG00000164850, ENSG00000107130, ENSG00000123384, ENSG00000144191, ENSG00000108819, ENSG00000152894, ENSG00000073282, ENSG00000174469, ENSG00000173846, ENSG00000151835, ENSG00000078369, ENSG00000108691, ENSG00000108010, ENSG0000…	2360	335	18224	1.2678	1	0.324809	0.295122
GOTERM_CC_DIRECT	GO:0016459~myosin complex	12	0.45819	0.0518857	ENSG00000101608, ENSG00000128641, ENSG00000105357, ENSG00000092841, ENSG00000157483, ENSG00000104081, ENSG00000100345, ENSG00000196586, ENSG00000197535, ENSG00000167306, ENSG00000197879, ENSG00000176658	2360	50	18224	1.85329	1	0.327144	0.297243
GOTERM_CC_DIRECT	GO:0005834~heterotrimeric G-protein complex	9	0.343643	0.0553344	ENSG00000172380, ENSG00000087258, ENSG00000078369, ENSG00000186469, ENSG00000120063, ENSG00000146535, ENSG00000114353, ENSG00000182732, ENSG00000060558	2360	33	18224	2.10601	1	0.345956	0.314337
GOTERM_CC_DIRECT	GO:0031252~cell leading edge	10	0.381825	0.0574892	ENSG00000171219, ENSG00000144824, ENSG00000198752, ENSG00000151914, ENSG00000115977, ENSG00000100345, ENSG00000132470, ENSG00000026025, ENSG00000166579, ENSG00000119411	2360	39	18224	1.98001	1	0.356433	0.323856
GOTERM_CC_DIRECT	GO:0035371~microtubule plus-end	6	0.229095	0.0588003	ENSG00000106665, ENSG00000084764, ENSG00000130779, ENSG00000151914, ENSG00000197535, ENSG00000074054	2360	17	18224	2.72542	1	0.361549	0.328504
GOTERM_CC_DIRECT	GO:0032580~Golgi cisterna membrane	16	0.61092	0.0610756	ENSG00000196371, ENSG00000033170, ENSG00000205155, ENSG00000110697, ENSG00000176920, ENSG00000115652, ENSG00000196968, ENSG00000139044, ENSG00000147408, ENSG00000145817, ENSG00000157350, ENSG00000123989, ENSG00000086062, ENSG00000197093, ENSG00000090615, ENSG00000143641	2360	76	18224	1.62569	1	0.372461	0.338419
GOTERM_CC_DIRECT	GO:0045202~synapse	32	1.22184	0.0618136	ENSG00000161638, ENSG00000109756, ENSG00000130479, ENSG00000137449, ENSG00000080845, ENSG00000185070, ENSG00000224389, ENSG00000185033, ENSG00000154380, ENSG00000100167, ENSG00000182389, ENSG00000087085, ENSG00000101199, ENSG00000134769, ENSG00000135679, ENSG00000167371, ENSG00000142192, ENSG00000159788, ENSG00000116675, ENSG00000020577, ENSG00000170558, ENSG00000055163, ENSG00000157680, ENSG0000…	2360	181	18224	1.36522	1	0.373897	0.339724
GOTERM_CC_DIRECT	GO:0012507~ER to Golgi transport vesicle membrane	12	0.45819	0.0661443	ENSG00000204525, ENSG00000143786, ENSG00000100934, ENSG00000113615, ENSG00000204642, ENSG00000234745, ENSG00000109321, ENSG00000138674, ENSG00000166710, ENSG00000163235, ENSG00000204592, ENSG00000085063	2360	52	18224	1.78201	1	0.396866	0.360593
GOTERM_CC_DIRECT	GO:0097060~synaptic membrane	6	0.229095	0.073057	ENSG00000109846, ENSG00000150093, ENSG00000157680, ENSG00000102359, ENSG00000105088, ENSG00000005884	2360	18	18224	2.57401	1	0.430146	0.390831
GOTERM_CC_DIRECT	GO:0044754~autolysosome	4	0.15273	0.0734254	ENSG00000101460, ENSG00000167996, ENSG00000161011, ENSG00000005893	2360	8	18224	3.86102	1	0.430146	0.390831
GOTERM_CC_DIRECT	GO:0005641~nuclear envelope lumen	4	0.15273	0.0734254	ENSG00000012779, ENSG00000142192, ENSG00000148344, ENSG00000197081	2360	8	18224	3.86102	1	0.430146	0.390831
GOTERM_CC_DIRECT	GO:0005740~mitochondrial envelope	5	0.190913	0.0765801	ENSG00000197150, ENSG00000184060, ENSG00000069535, ENSG00000100290, ENSG00000176171	2360	13	18224	2.97001	1	0.441671	0.401303
GOTERM_CC_DIRECT	GO:0005614~interstitial matrix	5	0.190913	0.0765801	ENSG00000179403, ENSG00000154175, ENSG00000204542, ENSG00000041982, ENSG00000091986	2360	13	18224	2.97001	1	0.441671	0.401303
GOTERM_CC_DIRECT	GO:0030666~endocytic vesicle membrane	14	0.534555	0.0784922	ENSG00000177575, ENSG00000135679, ENSG00000105974, ENSG00000075461, ENSG00000111186, ENSG00000006125, ENSG00000154764, ENSG00000010278, ENSG00000113070, ENSG00000123384, ENSG00000162552, ENSG00000125675, ENSG00000143147, ENSG00000161203	2360	66	18224	1.63801	1	0.449217	0.408159
GOTERM_CC_DIRECT	GO:0043218~compact myelin	3	0.114548	0.0840064	ENSG00000102934, ENSG00000109099, ENSG00000085063	2360	4	18224	5.79153	1	0.47349	0.430214
GOTERM_CC_DIRECT	GO:0005862~muscle thin filament tropomyosin	3	0.114548	0.0840064	ENSG00000143549, ENSG00000198467, ENSG00000167460	2360	4	18224	5.79153	1	0.47349	0.430214
GOTERM_CC_DIRECT	GO:0031463~Cul3-RING ubiquitin ligase complex	14	0.534555	0.0863893	ENSG00000130487, ENSG00000102271, ENSG00000179023, ENSG00000119771, ENSG00000112182, ENSG00000167487, ENSG00000109790, ENSG00000171617, ENSG00000003096, ENSG00000162413, ENSG00000109079, ENSG00000183655, ENSG00000162873, ENSG00000110906	2360	67	18224	1.61356	1	0.483261	0.439092
GOTERM_CC_DIRECT	GO:0031258~lamellipodium membrane	6	0.229095	0.0890171	ENSG00000172757, ENSG00000100558, ENSG00000125753, ENSG00000138448, ENSG00000259207, ENSG00000078098	2360	19	18224	2.43854	1	0.494244	0.449071
GOTERM_CC_DIRECT	GO:0031234~extrinsic component of cytoplasmic side of plasma membrane	14	0.534555	0.0947665	ENSG00000105971, ENSG00000134769, ENSG00000108669, ENSG00000174292, ENSG00000178996, ENSG00000156299, ENSG00000105639, ENSG00000176105, ENSG00000169282, ENSG00000197956, ENSG00000083799, ENSG00000254087, ENSG00000143322, ENSG00000162434	2360	68	18224	1.58983	1	0.515031	0.467959
GOTERM_CC_DIRECT	GO:0019897~extrinsic component of plasma membrane	7	0.267278	0.0948378	ENSG00000149418, ENSG00000005001, ENSG00000182718, ENSG00000115977, ENSG00000137501, ENSG00000140545, ENSG00000197747	2360	25	18224	2.16217	1	0.515031	0.467959
GOTERM_CC_DIRECT	GO:0000421~autophagosome membrane	7	0.267278	0.0948378	ENSG00000101460, ENSG00000139112, ENSG00000181652, ENSG00000070540, ENSG00000140941, ENSG00000198925, ENSG00000097033	2360	25	18224	2.16217	1	0.515031	0.467959
GOTERM_CC_DIRECT	GO:0016600~flotillin complex	4	0.15273	0.0998546	ENSG00000168036, ENSG00000039068, ENSG00000044115, ENSG00000110880	2360	9	18224	3.43202	1	0.538347	0.489143
