# Supplementary material for: Modeling fibrotic alveolar transitional cells with pluripotent stem cell-derived alveolar organoids
Source: Life Sci Alliance. 2023 May 25;6(8):e202201853. doi: 10.26508/lsa.202201853 (PMC10213712; doi:10.26508/lsa.202201853)
Supplement: Supplementary file 8 [file LSA-2022-01853_SdataF2.8.xlsx]

## Sheet: SdataF2.8
Category	Term	Count	%	PValue	Genes	List Total	Pop Hits	Pop Total	Fold Enrichment	Bonferroni	Benjamini	FDR
KEGG_PATHWAY	hsa04510:Focal adhesion	73	2.78732	2.78514e-15	ENSG00000108821, ENSG00000130635, ENSG00000128591, ENSG00000134871, ENSG00000174775, ENSG00000180370, ENSG00000065534, ENSG00000164171, ENSG00000162909, ENSG00000058085, ENSG00000187498, ENSG00000160293, ENSG00000070831, ENSG00000035403, ENSG00000140443, ENSG00000105664, ENSG00000075624, ENSG00000130402, ENSG00000072110, ENSG00000091136, ENSG00000197565, ENSG00000138448, ENSG00000169031, ENSG0000…	939	206	6879	2.59606	7.52176e-13	7.54774e-13	5.96021e-13
KEGG_PATHWAY	hsa05200:Pathways in cancer	97	3.7037	2.22856e-09	ENSG00000134871, ENSG00000174775, ENSG00000164171, ENSG00000138675, ENSG00000154764, ENSG00000132170, ENSG00000162552, ENSG00000070831, ENSG00000162434, ENSG00000106799, ENSG00000091136, ENSG00000138448, ENSG00000171552, ENSG00000111186, ENSG00000138685, ENSG00000110092, ENSG00000114450, ENSG00000091409, ENSG00000081059, ENSG00000056558, ENSG00000081052, ENSG00000171680, ENSG00000152689, ENSG0000…	939	393	6879	1.80817	6.0394e-07	3.0197e-07	2.38456e-07
KEGG_PATHWAY	hsa05412:Arrhythmogenic right ventricular cardiomyopathy (ARVC)	29	1.10729	1.16002e-08	ENSG00000161638, ENSG00000134755, ENSG00000096696, ENSG00000152661, ENSG00000137809, ENSG00000160789, ENSG00000105855, ENSG00000153956, ENSG00000132470, ENSG00000044115, ENSG00000164171, ENSG00000057294, ENSG00000173801, ENSG00000005884, ENSG00000168036, ENSG00000259207, ENSG00000182389, ENSG00000163069, ENSG00000184009, ENSG00000075624, ENSG00000150093, ENSG00000138448, ENSG00000075461, ENSG0000…	939	67	6879	3.1709	3.14364e-06	1.04788e-06	8.27478e-07
KEGG_PATHWAY	hsa05205:Proteoglycans in cancer	58	2.21459	1.7458e-08	ENSG00000128591, ENSG00000135925, ENSG00000174775, ENSG00000139329, ENSG00000114423, ENSG00000164171, ENSG00000154764, ENSG00000168610, ENSG00000126458, ENSG00000087245, ENSG00000162552, ENSG00000070831, ENSG00000164930, ENSG00000140443, ENSG00000075624, ENSG00000155760, ENSG00000156299, ENSG00000143816, ENSG00000138448, ENSG00000136068, ENSG00000111186, ENSG00000138685, ENSG00000110092, ENSG0000…	939	200	6879	2.1245	4.73112e-06	1.18278e-06	9.34005e-07
KEGG_PATHWAY	hsa04668:TNF signaling pathway	38	1.45094	2.56984e-08	ENSG00000129465, ENSG00000131323, ENSG00000073756, ENSG00000163739, ENSG00000026103, ENSG00000172216, ENSG00000003402, ENSG00000003400, ENSG00000006210, ENSG00000082512, ENSG00000107175, ENSG00000164136, ENSG00000023445, ENSG00000128342, ENSG00000146592, ENSG00000115009, ENSG00000168040, ENSG00000173039, ENSG00000110330, ENSG00000157227, ENSG00000184371, ENSG00000137275, ENSG00000118503, ENSG0000…	939	107	6879	2.60171	6.96424e-06	1.20009e-06	9.47671e-07
KEGG_PATHWAY	hsa04060:Cytokine-cytokine receptor interaction	66	2.52005	2.65702e-08	ENSG00000196083, ENSG00000110944, ENSG00000049249, ENSG00000131724, ENSG00000077238, ENSG00000027697, ENSG00000175505, ENSG00000113494, ENSG00000134470, ENSG00000163083, ENSG00000115590, ENSG00000125845, ENSG00000131080, ENSG00000125726, ENSG00000102962, ENSG00000124875, ENSG00000164136, ENSG00000141655, ENSG00000054967, ENSG00000185436, ENSG00000169429, ENSG00000106799, ENSG00000243646, ENSG0000…	939	243	6879	1.98974	7.2005e-06	1.20009e-06	9.47671e-07
KEGG_PATHWAY	hsa04360:Axon guidance	42	1.60367	4.28238e-08	ENSG00000101096, ENSG00000153993, ENSG00000107731, ENSG00000128594, ENSG00000105976, ENSG00000099204, ENSG00000143590, ENSG00000174775, ENSG00000180370, ENSG00000135622, ENSG00000143434, ENSG00000148948, ENSG00000185033, ENSG00000130827, ENSG00000182541, ENSG00000106683, ENSG00000125266, ENSG00000070831, ENSG00000106123, ENSG00000133216, ENSG00000099617, ENSG00000001617, ENSG00000065320, ENSG0000…	939	127	6879	2.42273	1.16052e-05	1.52582e-06	1.20489e-06
KEGG_PATHWAY	hsa04810:Regulation of actin cytoskeleton	59	2.25277	4.50427e-08	ENSG00000162704, ENSG00000166908, ENSG00000113578, ENSG00000174775, ENSG00000180370, ENSG00000065534, ENSG00000164171, ENSG00000138675, ENSG00000160293, ENSG00000126458, ENSG00000130429, ENSG00000106683, ENSG00000070831, ENSG00000035403, ENSG00000075624, ENSG00000130402, ENSG00000156299, ENSG00000072110, ENSG00000138448, ENSG00000138685, ENSG00000091409, ENSG00000172757, ENSG00000082781, ENSG0000…	939	210	6879	2.05822	1.22065e-05	1.52582e-06	1.20489e-06
KEGG_PATHWAY	hsa04064:NF-kappa B signaling pathway	31	1.18366	5.78304e-07	ENSG00000131323, ENSG00000198286, ENSG00000073756, ENSG00000095585, ENSG00000172175, ENSG00000003402, ENSG00000077150, ENSG00000082512, ENSG00000120659, ENSG00000142867, ENSG00000141655, ENSG00000169429, ENSG00000127666, ENSG00000023445, ENSG00000104856, ENSG00000171552, ENSG00000197943, ENSG00000173039, ENSG00000110330, ENSG00000172936, ENSG00000137275, ENSG00000118503, ENSG00000006062, ENSG0000…	939	87	6879	2.61037	0.000156708	1.74134e-05	1.37508e-05
KEGG_PATHWAY	hsa04010:MAPK signaling pathway	64	2.44368	7.24058e-07	ENSG00000109756, ENSG00000071054, ENSG00000128591, ENSG00000153956, ENSG00000113578, ENSG00000099860, ENSG00000174775, ENSG00000180370, ENSG00000138675, ENSG00000077150, ENSG00000081189, ENSG00000126458, ENSG00000070831, ENSG00000184545, ENSG00000108861, ENSG00000095015, ENSG00000106799, ENSG00000130522, ENSG00000116717, ENSG00000104856, ENSG00000136068, ENSG00000075461, ENSG00000198216, ENSG0000…	939	253	6879	1.85319	0.000196201	1.9622e-05	1.54948e-05
KEGG_PATHWAY	hsa04015:Rap1 signaling pathway	55	2.10004	1.59226e-06	ENSG00000109756, ENSG00000143590, ENSG00000113578, ENSG00000174775, ENSG00000138675, ENSG00000118432, ENSG00000120318, ENSG00000126458, ENSG00000128512, ENSG00000070831, ENSG00000140443, ENSG00000099617, ENSG00000075624, ENSG00000156299, ENSG00000138685, ENSG00000243364, ENSG00000116991, ENSG00000116473, ENSG00000184371, ENSG00000185386, ENSG00000178184, ENSG00000017427, ENSG00000127314, ENSG0000…	939	210	6879	1.91868	0.00043141	3.92275e-05	3.09767e-05
KEGG_PATHWAY	hsa05100:Bacterial invasion of epithelial cells	28	1.06911	1.94448e-06	ENSG00000105971, ENSG00000161638, ENSG00000105974, ENSG00000105976, ENSG00000162704, ENSG00000039068, ENSG00000114423, ENSG00000138758, ENSG00000044115, ENSG00000115414, ENSG00000241553, ENSG00000166333, ENSG00000168036, ENSG00000129946, ENSG00000130429, ENSG00000100167, ENSG00000070831, ENSG00000184009, ENSG00000050820, ENSG00000035403, ENSG00000075624, ENSG00000150093, ENSG00000175416, ENSG0000…	939	78	6879	2.6298	0.000526816	4.11766e-05	3.25158e-05
KEGG_PATHWAY	hsa04512:ECM-receptor interaction	30	1.14548	1.97526e-06	ENSG00000161638, ENSG00000137809, ENSG00000108821, ENSG00000130635, ENSG00000105855, ENSG00000134871, ENSG00000132470, ENSG00000137801, ENSG00000164171, ENSG00000115414, ENSG00000041982, ENSG00000058085, ENSG00000005884, ENSG00000187498, ENSG00000259207, ENSG00000105664, ENSG00000150093, ENSG00000110799, ENSG00000091136, ENSG00000197565, ENSG00000138448, ENSG00000169031, ENSG00000204262, ENSG0000…	939	87	6879	2.52617	0.000535153	4.11766e-05	3.25158e-05
KEGG_PATHWAY	hsa04151:PI3K-Akt signaling pathway	79	3.01642	2.26434e-06	ENSG00000108821, ENSG00000130635, ENSG00000077238, ENSG00000143590, ENSG00000113578, ENSG00000134871, ENSG00000105639, ENSG00000174775, ENSG00000164171, ENSG00000138675, ENSG00000058085, ENSG00000113494, ENSG00000187498, ENSG00000118515, ENSG00000107175, ENSG00000162434, ENSG00000140443, ENSG00000104695, ENSG00000105664, ENSG00000099617, ENSG00000068971, ENSG00000091136, ENSG00000197565, ENSG0000…	939	345	6879	1.67752	0.000613448	4.38311e-05	3.4612e-05
KEGG_PATHWAY	hsa04115:p53 signaling pathway	25	0.954563	3.62291e-06	ENSG00000099860, ENSG00000134574, ENSG00000137801, ENSG00000026103, ENSG00000118971, ENSG00000206075, ENSG00000164054, ENSG00000015475, ENSG00000048392, ENSG00000106366, ENSG00000135679, ENSG00000130766, ENSG00000116717, ENSG00000175793, ENSG00000112378, ENSG00000115129, ENSG00000115107, ENSG00000172667, ENSG00000110092, ENSG00000085117, ENSG00000147889, ENSG00000164305, ENSG00000146674, ENSG0000…	939	67	6879	2.73354	0.000981328	6.54539e-05	5.16868e-05
KEGG_PATHWAY	hsa05146:Amoebiasis	33	1.26002	6.61186e-06	ENSG00000021355, ENSG00000124570, ENSG00000108821, ENSG00000130635, ENSG00000134871, ENSG00000115414, ENSG00000136634, ENSG00000058085, ENSG00000060558, ENSG00000276600, ENSG00000187498, ENSG00000115590, ENSG00000101333, ENSG00000169429, ENSG00000081181, ENSG00000035403, ENSG00000130402, ENSG00000072110, ENSG00000105329, ENSG00000091136, ENSG00000197565, ENSG00000169031, ENSG00000204262, ENSG0000…	939	106	6879	2.2807	0.00179022	0.000106245	8.38984e-05
KEGG_PATHWAY	hsa05410:Hypertrophic cardiomyopathy (HCM)	27	1.03093	6.66483e-06	ENSG00000161638, ENSG00000137809, ENSG00000160789, ENSG00000105855, ENSG00000162409, ENSG00000153956, ENSG00000198467, ENSG00000167460, ENSG00000132470, ENSG00000164171, ENSG00000005884, ENSG00000259207, ENSG00000182389, ENSG00000163069, ENSG00000184009, ENSG00000075624, ENSG00000150093, ENSG00000105329, ENSG00000138448, ENSG00000075461, ENSG00000119699, ENSG00000091409, ENSG00000082781, ENSG0000…	939	78	6879	2.53588	0.00180454	0.000106245	8.38984e-05
KEGG_PATHWAY	hsa04210:Apoptosis	23	0.878198	1.09541e-05	ENSG00000023445, ENSG00000104689, ENSG00000168040, ENSG00000173530, ENSG00000026103, ENSG00000171552, ENSG00000162909, ENSG00000134259, ENSG00000003402, ENSG00000173039, ENSG00000110330, ENSG00000003400, ENSG00000137275, ENSG00000121858, ENSG00000117020, ENSG00000006062, ENSG00000171608, ENSG00000232810, ENSG00000120889, ENSG00000164305, ENSG00000015475, ENSG00000102871, ENSG00000014216	939	62	6879	2.71766	0.00296419	0.000164921	0.000130233
KEGG_PATHWAY	hsa04145:Phagosome	41	1.56548	1.43378e-05	ENSG00000174130, ENSG00000161638, ENSG00000176014, ENSG00000113732, ENSG00000168394, ENSG00000116701, ENSG00000137801, ENSG00000164171, ENSG00000058262, ENSG00000137267, ENSG00000204592, ENSG00000276600, ENSG00000137285, ENSG00000234745, ENSG00000127824, ENSG00000185896, ENSG00000259207, ENSG00000185359, ENSG00000184009, ENSG00000105664, ENSG00000173391, ENSG00000075624, ENSG00000150093, ENSG0000…	939	150	6879	2.00241	0.00387804	0.000204503	0.000161489
KEGG_PATHWAY	hsa04380:Osteoclast differentiation	37	1.41275	1.87754e-05	ENSG00000101096, ENSG00000095585, ENSG00000115415, ENSG00000116701, ENSG00000027697, ENSG00000213928, ENSG00000077150, ENSG00000142166, ENSG00000120659, ENSG00000132170, ENSG00000159110, ENSG00000259207, ENSG00000141655, ENSG00000033327, ENSG00000162434, ENSG00000175592, ENSG00000106799, ENSG00000130522, ENSG00000075426, ENSG00000105329, ENSG00000104856, ENSG00000115008, ENSG00000159128, ENSG0000…	939	131	6879	2.06914	0.00507526	0.000254407	0.000200897
KEGG_PATHWAY	hsa04520:Adherens junction	24	0.91638	3.78572e-05	ENSG00000130202, ENSG00000106799, ENSG00000130402, ENSG00000075624, ENSG00000142949, ENSG00000105976, ENSG00000196396, ENSG00000072110, ENSG00000128340, ENSG00000006607, ENSG00000039068, ENSG00000176105, ENSG00000044115, ENSG00000110400, ENSG00000143217, ENSG00000158195, ENSG00000081059, ENSG00000168036, ENSG00000070831, ENSG00000184009, ENSG00000035403, ENSG00000019549, ENSG00000104067, ENSG0000…	939	71	6879	2.47635	0.010207	0.000488538	0.000385783
KEGG_PATHWAY	hsa05203:Viral carcinogenesis	50	1.90913	4.04077e-05	ENSG00000185507, ENSG00000131323, ENSG00000158406, ENSG00000105639, ENSG00000174775, ENSG00000204592, ENSG00000077150, ENSG00000276966, ENSG00000168610, ENSG00000124635, ENSG00000082512, ENSG00000030110, ENSG00000107175, ENSG00000070831, ENSG00000162434, ENSG00000130402, ENSG00000072110, ENSG00000170027, ENSG00000110092, ENSG00000056558, ENSG00000164305, ENSG00000254087, ENSG00000162889, ENSG0000…	939	205	6879	1.7868	0.010891	0.000497749	0.000393057
KEGG_PATHWAY	hsa05132:Salmonella infection	26	0.992745	6.94273e-05	ENSG00000162704, ENSG00000163739, ENSG00000128591, ENSG00000174996, ENSG00000027697, ENSG00000241553, ENSG00000276600, ENSG00000130429, ENSG00000070831, ENSG00000169429, ENSG00000184009, ENSG00000126214, ENSG00000104067, ENSG00000075624, ENSG00000197102, ENSG00000115008, ENSG00000136068, ENSG00000159128, ENSG00000173039, ENSG00000196924, ENSG00000172936, ENSG00000077380, ENSG00000158195, ENSG0000…	939	83	6879	2.29485	0.0186395	0.000792479	0.000625795
KEGG_PATHWAY	hsa04014:Ras signaling pathway	53	2.02367	7.01827e-05	ENSG00000134954, ENSG00000148680, ENSG00000143590, ENSG00000113578, ENSG00000174775, ENSG00000180370, ENSG00000075651, ENSG00000138675, ENSG00000126458, ENSG00000070831, ENSG00000140443, ENSG00000099617, ENSG00000156299, ENSG00000171552, ENSG00000138685, ENSG00000243364, ENSG00000171435, ENSG00000114450, ENSG00000116473, ENSG00000184371, ENSG00000078369, ENSG00000017427, ENSG00000127314, ENSG0000…	939	226	6879	1.71802	0.0188404	0.000792479	0.000625795
KEGG_PATHWAY	hsa04350:TGF-beta signaling pathway	26	0.992745	8.63083e-05	ENSG00000158747, ENSG00000049323, ENSG00000198742, ENSG00000164093, ENSG00000137801, ENSG00000116985, ENSG00000177426, ENSG00000204217, ENSG00000163083, ENSG00000125845, ENSG00000115170, ENSG00000095739, ENSG00000104695, ENSG00000106799, ENSG00000156574, ENSG00000105329, ENSG00000137713, ENSG00000134363, ENSG00000112175, ENSG00000119699, ENSG00000232810, ENSG00000183682, ENSG00000147883, ENSG0000…	939	84	6879	2.26753	0.0231191	0.000899598	0.000710384
KEGG_PATHWAY	hsa05414:Dilated cardiomyopathy	26	0.992745	8.63083e-05	ENSG00000161638, ENSG00000137809, ENSG00000160789, ENSG00000105855, ENSG00000153956, ENSG00000198467, ENSG00000167460, ENSG00000132470, ENSG00000164171, ENSG00000005884, ENSG00000259207, ENSG00000182389, ENSG00000163069, ENSG00000184009, ENSG00000075624, ENSG00000150093, ENSG00000105329, ENSG00000138448, ENSG00000075461, ENSG00000119699, ENSG00000091409, ENSG00000082781, ENSG00000143549, ENSG0000…	939	84	6879	2.26753	0.0231191	0.000899598	0.000710384
KEGG_PATHWAY	hsa05142:Chagas disease (American trypanosomiasis)	30	1.14548	9.00013e-05	ENSG00000174130, ENSG00000027697, ENSG00000026103, ENSG00000136634, ENSG00000003402, ENSG00000060558, ENSG00000168398, ENSG00000101333, ENSG00000169429, ENSG00000127666, ENSG00000106366, ENSG00000104695, ENSG00000106799, ENSG00000156475, ENSG00000105329, ENSG00000168040, ENSG00000137713, ENSG00000159128, ENSG00000173039, ENSG00000114353, ENSG00000119699, ENSG00000172936, ENSG00000087258, ENSG0000…	939	104	6879	2.11323	0.0240964	0.000903346	0.000713343
KEGG_PATHWAY	hsa04670:Leukocyte transendothelial migration	32	1.22184	0.000104489	ENSG00000181885, ENSG00000213445, ENSG00000116701, ENSG00000044115, ENSG00000168036, ENSG00000160293, ENSG00000101335, ENSG00000087245, ENSG00000070831, ENSG00000184009, ENSG00000050820, ENSG00000035403, ENSG00000163347, ENSG00000130402, ENSG00000075624, ENSG00000072110, ENSG00000150093, ENSG00000128340, ENSG00000197943, ENSG00000114353, ENSG00000101608, ENSG00000116473, ENSG00000189143, ENSG0000…	939	115	6879	2.03851	0.0279208	0.000997712	0.000787861
KEGG_PATHWAY	hsa05222:Small cell lung cancer	26	0.992745	0.000106766	ENSG00000131323, ENSG00000073756, ENSG00000134871, ENSG00000164171, ENSG00000115414, ENSG00000058085, ENSG00000005884, ENSG00000187498, ENSG00000082512, ENSG00000023445, ENSG00000150093, ENSG00000091136, ENSG00000197565, ENSG00000138448, ENSG00000169031, ENSG00000171552, ENSG00000173039, ENSG00000110330, ENSG00000110092, ENSG00000091409, ENSG00000117020, ENSG00000171608, ENSG00000147883, ENSG0000…	939	85	6879	2.24086	0.0285206	0.000997712	0.000787861
KEGG_PATHWAY	hsa05160:Hepatitis C	35	1.33639	0.000154061	ENSG00000185507, ENSG00000131323, ENSG00000181885, ENSG00000263528, ENSG00000115415, ENSG00000174775, ENSG00000111335, ENSG00000213928, ENSG00000142166, ENSG00000168610, ENSG00000089127, ENSG00000159110, ENSG00000125347, ENSG00000169429, ENSG00000127666, ENSG00000162434, ENSG00000163347, ENSG00000104695, ENSG00000156475, ENSG00000137713, ENSG00000173039, ENSG00000164342, ENSG00000189143, ENSG0000…	939	133	6879	1.92786	0.0408942	0.00139169	0.00109897
KEGG_PATHWAY	hsa05164:Influenza A	42	1.60367	0.000235777	ENSG00000185507, ENSG00000104689, ENSG00000263528, ENSG00000115415, ENSG00000111335, ENSG00000027697, ENSG00000026103, ENSG00000213928, ENSG00000173744, ENSG00000275896, ENSG00000142166, ENSG00000089127, ENSG00000159110, ENSG00000169429, ENSG00000184009, ENSG00000127666, ENSG00000140464, ENSG00000162434, ENSG00000140564, ENSG00000075624, ENSG00000241106, ENSG00000115008, ENSG00000173530, ENSG0000…	939	174	6879	1.76832	0.0619042	0.00206115	0.00162762
KEGG_PATHWAY	hsa05145:Toxoplasmosis	29	1.10729	0.000617419	ENSG00000110324, ENSG00000115415, ENSG00000027697, ENSG00000136634, ENSG00000058085, ENSG00000168610, ENSG00000162434, ENSG00000023445, ENSG00000150093, ENSG00000105329, ENSG00000243646, ENSG00000091136, ENSG00000241106, ENSG00000171552, ENSG00000159128, ENSG00000173039, ENSG00000114353, ENSG00000110330, ENSG00000119699, ENSG00000172936, ENSG00000091409, ENSG00000012779, ENSG00000087258, ENSG0000…	939	110	6879	1.93137	0.154115	0.00522877	0.00412899
KEGG_PATHWAY	hsa05152:Tuberculosis	41	1.56548	0.000690756	ENSG00000174130, ENSG00000110944, ENSG00000110324, ENSG00000172175, ENSG00000115415, ENSG00000027697, ENSG00000172216, ENSG00000136634, ENSG00000003400, ENSG00000134070, ENSG00000142867, ENSG00000185896, ENSG00000015475, ENSG00000176170, ENSG00000162434, ENSG00000104312, ENSG00000178363, ENSG00000111424, ENSG00000105329, ENSG00000243646, ENSG00000241106, ENSG00000115008, ENSG00000168040, ENSG0000…	939	177	6879	1.69695	0.170771	0.00567257	0.00447945
KEGG_PATHWAY	hsa05168:Herpes simplex infection	42	1.60367	0.000715786	ENSG00000185507, ENSG00000131323, ENSG00000099804, ENSG00000263528, ENSG00000168394, ENSG00000115415, ENSG00000111335, ENSG00000027697, ENSG00000026103, ENSG00000110400, ENSG00000213928, ENSG00000204592, ENSG00000142166, ENSG00000082512, ENSG00000089127, ENSG00000234745, ENSG00000159110, ENSG00000164136, ENSG00000127666, ENSG00000140464, ENSG00000162434, ENSG00000130202, ENSG00000197780, ENSG0000…	939	183	6879	1.68135	0.176381	0.00570524	0.00450524
KEGG_PATHWAY	hsa05133:Pertussis	22	0.840015	0.000770004	ENSG00000110944, ENSG00000161638, ENSG00000150093, ENSG00000178363, ENSG00000115008, ENSG00000136634, ENSG00000173039, ENSG00000114353, ENSG00000172936, ENSG00000172757, ENSG00000224389, ENSG00000169896, ENSG00000185386, ENSG00000232810, ENSG00000164305, ENSG00000125347, ENSG00000124875, ENSG00000163735, ENSG00000169429, ENSG00000125730, ENSG00000127666, ENSG00000182326	939	75	6879	2.14892	0.188403	0.00596203	0.00470802
KEGG_PATHWAY	hsa04068:FoxO signaling pathway	33	1.26002	0.000868083	ENSG00000113916, ENSG00000162409, ENSG00000174775, ENSG00000099860, ENSG00000156804, ENSG00000136634, ENSG00000118971, ENSG00000168610, ENSG00000118515, ENSG00000169047, ENSG00000176171, ENSG00000145632, ENSG00000140443, ENSG00000129355, ENSG00000106799, ENSG00000135679, ENSG00000116717, ENSG00000103942, ENSG00000105329, ENSG00000119699, ENSG00000110092, ENSG00000150907, ENSG00000139112, ENSG0000…	939	134	6879	1.80413	0.209708	0.00653474	0.00516027
KEGG_PATHWAY	hsa04390:Hippo signaling pathway	36	1.37457	0.000906342	ENSG00000139926, ENSG00000135925, ENSG00000039068, ENSG00000074047, ENSG00000113578, ENSG00000044115, ENSG00000116985, ENSG00000154764, ENSG00000118971, ENSG00000204217, ENSG00000125845, ENSG00000168036, ENSG00000162552, ENSG00000184009, ENSG00000106366, ENSG00000164930, ENSG00000104695, ENSG00000106799, ENSG00000075624, ENSG00000155760, ENSG00000156475, ENSG00000105329, ENSG00000143816, ENSG0000…	939	151	6879	1.74657	0.217867	0.00663835	0.00524209
KEGG_PATHWAY	hsa04514:Cell adhesion molecules (CAMs)	34	1.29821	0.00119775	ENSG00000181885, ENSG00000128594, ENSG00000105855, ENSG00000039068, ENSG00000103855, ENSG00000110400, ENSG00000204592, ENSG00000148948, ENSG00000120217, ENSG00000234745, ENSG00000163347, ENSG00000130202, ENSG00000142949, ENSG00000150093, ENSG00000110876, ENSG00000116815, ENSG00000241106, ENSG00000138448, ENSG00000198910, ENSG00000197965, ENSG00000174469, ENSG00000204525, ENSG00000170558, ENSG0000…	939	142	6879	1.75408	0.277317	0.00854184	0.00674522
KEGG_PATHWAY	hsa05162:Measles	32	1.22184	0.00158296	ENSG00000185507, ENSG00000104689, ENSG00000263528, ENSG00000115415, ENSG00000105639, ENSG00000111335, ENSG00000027697, ENSG00000026103, ENSG00000213928, ENSG00000118971, ENSG00000142166, ENSG00000168610, ENSG00000089127, ENSG00000159110, ENSG00000162434, ENSG00000126561, ENSG00000115008, ENSG00000173530, ENSG00000159128, ENSG00000173039, ENSG00000115267, ENSG00000157601, ENSG00000110092, ENSG0000…	939	133	6879	1.76262	0.349051	0.0109996	0.00868601
KEGG_PATHWAY	hsa04610:Complement and coagulation cascades	20	0.76365	0.00167612	ENSG00000243649, ENSG00000104368, ENSG00000171560, ENSG00000110799, ENSG00000171564, ENSG00000117525, ENSG00000171860, ENSG00000197249, ENSG00000131187, ENSG00000171557, ENSG00000224389, ENSG00000168398, ENSG00000188488, ENSG00000099937, ENSG00000125730, ENSG00000122861, ENSG00000106366, ENSG00000085063, ENSG00000182326, ENSG00000011422	939	69	6879	2.12344	0.365304	0.0113557	0.00896724
KEGG_PATHWAY	hsa05161:Hepatitis B	34	1.29821	0.00173937	ENSG00000185507, ENSG00000101096, ENSG00000263528, ENSG00000115415, ENSG00000174775, ENSG00000134574, ENSG00000026103, ENSG00000138378, ENSG00000003400, ENSG00000142166, ENSG00000168610, ENSG00000107175, ENSG00000169429, ENSG00000127666, ENSG00000162434, ENSG00000095015, ENSG00000106799, ENSG00000126561, ENSG00000105329, ENSG00000146592, ENSG00000168040, ENSG00000173039, ENSG00000115267, ENSG0000…	939	145	6879	1.71779	0.376108	0.0114968	0.00907864
KEGG_PATHWAY	hsa04066:HIF-1 signaling pathway	25	0.954563	0.00192087	ENSG00000129521, ENSG00000159399, ENSG00000111674, ENSG00000027697, ENSG00000170525, ENSG00000168610, ENSG00000117394, ENSG00000102265, ENSG00000106366, ENSG00000140443, ENSG00000108515, ENSG00000156510, ENSG00000100292, ENSG00000099875, ENSG00000072274, ENSG00000159128, ENSG00000197943, ENSG00000156515, ENSG00000152256, ENSG00000173039, ENSG00000117020, ENSG00000171608, ENSG00000078401, ENSG0000…	939	96	6879	1.90778	0.406108	0.0123942	0.00978731
KEGG_PATHWAY	hsa04144:Endocytosis	50	1.90913	0.00219959	ENSG00000108669, ENSG00000024422, ENSG00000162704, ENSG00000174775, ENSG00000198742, ENSG00000075651, ENSG00000114423, ENSG00000204592, ENSG00000139722, ENSG00000084733, ENSG00000120318, ENSG00000153071, ENSG00000130429, ENSG00000072818, ENSG00000101199, ENSG00000070831, ENSG00000185359, ENSG00000140443, ENSG00000013016, ENSG00000106799, ENSG00000134287, ENSG00000168461, ENSG00000072274, ENSG0000…	939	241	6879	1.51989	0.449399	0.0138625	0.0109468
KEGG_PATHWAY	hsa05130:Pathogenic Escherichia coli infection	16	0.61092	0.00249116	ENSG00000075624, ENSG00000176014, ENSG00000150093, ENSG00000162704, ENSG00000039068, ENSG00000241553, ENSG00000137267, ENSG00000085733, ENSG00000137285, ENSG00000167552, ENSG00000168036, ENSG00000258947, ENSG00000130429, ENSG00000127824, ENSG00000070831, ENSG00000184009	939	51	6879	2.29831	0.491326	0.0153433	0.0121161
KEGG_PATHWAY	hsa04071:Sphingolipid signaling pathway	29	1.10729	0.00256727	ENSG00000174775, ENSG00000075651, ENSG00000163082, ENSG00000166311, ENSG00000168398, ENSG00000101333, ENSG00000015475, ENSG00000176170, ENSG00000033327, ENSG00000104695, ENSG00000213694, ENSG00000156475, ENSG00000177076, ENSG00000068971, ENSG00000128340, ENSG00000137713, ENSG00000267534, ENSG00000173039, ENSG00000114353, ENSG00000164023, ENSG00000166224, ENSG00000117020, ENSG00000232810, ENSG0000…	939	120	6879	1.77042	0.501735	0.0154607	0.0122088
KEGG_PATHWAY	hsa05169:Epstein-Barr virus infection	29	1.10729	0.00330898	ENSG00000131323, ENSG00000175166, ENSG00000105639, ENSG00000026025, ENSG00000204592, ENSG00000077150, ENSG00000168610, ENSG00000082512, ENSG00000234745, ENSG00000162434, ENSG00000135679, ENSG00000116815, ENSG00000104856, ENSG00000197943, ENSG00000173039, ENSG00000204525, ENSG00000137275, ENSG00000118503, ENSG00000204642, ENSG00000117020, ENSG00000006062, ENSG00000185386, ENSG00000171608, ENSG0000…	939	122	6879	1.7414	0.592707	0.0194942	0.015394
KEGG_PATHWAY	hsa05202:Transcriptional misregulation in cancer	36	1.37457	0.00544185	ENSG00000113916, ENSG00000147050, ENSG00000104368, ENSG00000105976, ENSG00000162924, ENSG00000178573, ENSG00000135363, ENSG00000172216, ENSG00000173801, ENSG00000118971, ENSG00000132170, ENSG00000115590, ENSG00000124813, ENSG00000081189, ENSG00000278828, ENSG00000139083, ENSG00000169429, ENSG00000140464, ENSG00000140443, ENSG00000158715, ENSG00000135679, ENSG00000197461, ENSG00000033170, ENSG0000…	939	167	6879	1.57923	0.772082	0.0313775	0.0247778
KEGG_PATHWAY	hsa04530:Tight junction	22	0.840015	0.00557178	ENSG00000104695, ENSG00000181885, ENSG00000105357, ENSG00000130402, ENSG00000075624, ENSG00000156475, ENSG00000072110, ENSG00000137713, ENSG00000101608, ENSG00000166025, ENSG00000085733, ENSG00000060138, ENSG00000189143, ENSG00000253958, ENSG00000100345, ENSG00000101335, ENSG00000178184, ENSG00000184697, ENSG00000070831, ENSG00000184009, ENSG00000104067, ENSG00000163347	939	87	6879	1.85252	0.78001	0.0314573	0.0248408
KEGG_PATHWAY	hsa04630:Jak-STAT signaling pathway	32	1.22184	0.00637526	ENSG00000110944, ENSG00000110324, ENSG00000131724, ENSG00000077238, ENSG00000115415, ENSG00000105639, ENSG00000027697, ENSG00000213928, ENSG00000136634, ENSG00000138378, ENSG00000118971, ENSG00000113494, ENSG00000142166, ENSG00000168610, ENSG00000134470, ENSG00000120833, ENSG00000159110, ENSG00000164136, ENSG00000185436, ENSG00000162434, ENSG00000095752, ENSG00000128342, ENSG00000126561, ENSG0000…	939	145	6879	1.61675	0.823287	0.0352591	0.027843
KEGG_PATHWAY	hsa04666:Fc gamma R-mediated phagocytosis	21	0.801833	0.00789735	ENSG00000162704, ENSG00000128340, ENSG00000168918, ENSG00000075651, ENSG00000241553, ENSG00000197943, ENSG00000148180, ENSG00000172757, ENSG00000158195, ENSG00000117020, ENSG00000171608, ENSG00000160293, ENSG00000130429, ENSG00000125753, ENSG00000254087, ENSG00000182541, ENSG00000070831, ENSG00000106683, ENSG00000277443, ENSG00000176170, ENSG00000033327	939	84	6879	1.83147	0.883362	0.0428037	0.0338007
KEGG_PATHWAY	hsa04662:B cell receptor signaling pathway	18	0.687285	0.00970074	ENSG00000101096, ENSG00000198286, ENSG00000095585, ENSG00000172175, ENSG00000128340, ENSG00000168918, ENSG00000155629, ENSG00000174775, ENSG00000152689, ENSG00000197943, ENSG00000173039, ENSG00000070190, ENSG00000117020, ENSG00000171608, ENSG00000160293, ENSG00000146232, ENSG00000254087, ENSG00000142867	939	69	6879	1.9111	0.928762	0.051547	0.0407051
KEGG_PATHWAY	hsa04062:Chemokine signaling pathway	38	1.45094	0.0103436	ENSG00000183625, ENSG00000163739, ENSG00000115415, ENSG00000174775, ENSG00000105639, ENSG00000172215, ENSG00000006210, ENSG00000168610, ENSG00000160293, ENSG00000129946, ENSG00000186469, ENSG00000163823, ENSG00000102962, ENSG00000124875, ENSG00000101333, ENSG00000161921, ENSG00000070831, ENSG00000169429, ENSG00000050820, ENSG00000172380, ENSG00000156234, ENSG00000156299, ENSG00000128340, ENSG0000…	939	186	6879	1.49668	0.940258	0.0539061	0.0425679
KEGG_PATHWAY	hsa04919:Thyroid hormone signaling pathway	26	0.992745	0.0108926	ENSG00000161714, ENSG00000211448, ENSG00000115415, ENSG00000174775, ENSG00000187091, ENSG00000074181, ENSG00000134250, ENSG00000168036, ENSG00000117394, ENSG00000148400, ENSG00000091831, ENSG00000101333, ENSG00000259207, ENSG00000162552, ENSG00000184009, ENSG00000090020, ENSG00000135679, ENSG00000075624, ENSG00000138448, ENSG00000197943, ENSG00000172348, ENSG00000110092, ENSG00000150907, ENSG0000…	939	115	6879	1.65629	0.948598	0.0556959	0.0439813
KEGG_PATHWAY	hsa04070:Phosphatidylinositol signaling system	23	0.878198	0.0112462	ENSG00000102780, ENSG00000161714, ENSG00000178363, ENSG00000101290, ENSG00000137825, ENSG00000155252, ENSG00000168918, ENSG00000166908, ENSG00000078269, ENSG00000151689, ENSG00000065357, ENSG00000187091, ENSG00000132376, ENSG00000197943, ENSG00000149091, ENSG00000040933, ENSG00000150867, ENSG00000157680, ENSG00000171608, ENSG00000086544, ENSG00000109452, ENSG00000101333, ENSG00000161896	939	98	6879	1.71934	0.953346	0.0564394	0.0445684
KEGG_PATHWAY	hsa05218:Melanoma	18	0.687285	0.0129526	ENSG00000161958, ENSG00000135679, ENSG00000197461, ENSG00000105976, ENSG00000039068, ENSG00000113578, ENSG00000174775, ENSG00000138685, ENSG00000138675, ENSG00000110092, ENSG00000147889, ENSG00000117020, ENSG00000171608, ENSG00000145431, ENSG00000100311, ENSG00000017427, ENSG00000124762, ENSG00000140443	939	71	6879	1.85726	0.970786	0.0615819	0.0486292
KEGG_PATHWAY	hsa05140:Leishmaniasis	18	0.687285	0.0129526	ENSG00000073756, ENSG00000150093, ENSG00000105329, ENSG00000241106, ENSG00000115008, ENSG00000115415, ENSG00000116701, ENSG00000027697, ENSG00000159128, ENSG00000136634, ENSG00000173039, ENSG00000119699, ENSG00000172936, ENSG00000169896, ENSG00000185386, ENSG00000232810, ENSG00000125730, ENSG00000162434	939	71	6879	1.85726	0.970786	0.0615819	0.0486292
KEGG_PATHWAY	hsa04917:Prolactin signaling pathway	18	0.687285	0.0129526	ENSG00000126561, ENSG00000115415, ENSG00000174775, ENSG00000173039, ENSG00000118971, ENSG00000110092, ENSG00000113494, ENSG00000168610, ENSG00000120659, ENSG00000117020, ENSG00000120833, ENSG00000185386, ENSG00000171608, ENSG00000125347, ENSG00000091831, ENSG00000129946, ENSG00000141655, ENSG00000184557	939	71	6879	1.85726	0.970786	0.0615819	0.0486292
KEGG_PATHWAY	hsa05323:Rheumatoid arthritis	21	0.801833	0.013307	ENSG00000110944, ENSG00000095752, ENSG00000105329, ENSG00000241106, ENSG00000113732, ENSG00000115008, ENSG00000115009, ENSG00000119699, ENSG00000184371, ENSG00000120659, ENSG00000232810, ENSG00000100554, ENSG00000124875, ENSG00000163735, ENSG00000108691, ENSG00000227507, ENSG00000164136, ENSG00000102575, ENSG00000141655, ENSG00000090339, ENSG00000169429	939	88	6879	1.74822	0.973495	0.0621759	0.0490983
KEGG_PATHWAY	hsa05211:Renal cell carcinoma	17	0.649103	0.0139074	ENSG00000129521, ENSG00000134954, ENSG00000105976, ENSG00000105329, ENSG00000174775, ENSG00000180370, ENSG00000077264, ENSG00000119699, ENSG00000116473, ENSG00000117020, ENSG00000117394, ENSG00000171608, ENSG00000100311, ENSG00000107263, ENSG00000070831, ENSG00000163235, ENSG00000127314	939	66	6879	1.88697	0.977525	0.0638796	0.0504437
KEGG_PATHWAY	hsa04370:VEGF signaling pathway	16	0.61092	0.014884	ENSG00000101096, ENSG00000105499, ENSG00000073756, ENSG00000128340, ENSG00000128052, ENSG00000174775, ENSG00000197943, ENSG00000117020, ENSG00000185386, ENSG00000171608, ENSG00000129946, ENSG00000089159, ENSG00000162889, ENSG00000070831, ENSG00000176170, ENSG00000106211	939	61	6879	1.92154	0.982818	0.0672262	0.0530864
KEGG_PATHWAY	hsa05166:HTLV-I infection	48	1.83276	0.0161319	ENSG00000101096, ENSG00000134954, ENSG00000135925, ENSG00000174775, ENSG00000105639, ENSG00000154764, ENSG00000204592, ENSG00000118971, ENSG00000077150, ENSG00000134470, ENSG00000115590, ENSG00000168036, ENSG00000117394, ENSG00000158186, ENSG00000234745, ENSG00000126458, ENSG00000164136, ENSG00000162552, ENSG00000164930, ENSG00000162434, ENSG00000095015, ENSG00000175592, ENSG00000106799, ENSG0000…	939	254	6879	1.38442	0.987813	0.071668	0.0565939
KEGG_PATHWAY	hsa05219:Bladder cancer	12	0.45819	0.0184645	ENSG00000110092, ENSG00000147889, ENSG00000135679, ENSG00000113070, ENSG00000025708, ENSG00000039068, ENSG00000174775, ENSG00000087245, ENSG00000137801, ENSG00000169429, ENSG00000124762, ENSG00000167657	939	41	6879	2.14416	0.993595	0.0794717	0.0627563
KEGG_PATHWAY	hsa05416:Viral myocarditis	15	0.572738	0.018475	ENSG00000105974, ENSG00000075624, ENSG00000128340, ENSG00000241106, ENSG00000204592, ENSG00000204525, ENSG00000110092, ENSG00000204642, ENSG00000234745, ENSG00000164305, ENSG00000015475, ENSG00000163069, ENSG00000090339, ENSG00000184009, ENSG00000143322	939	57	6879	1.92786	0.993613	0.0794717	0.0627563
KEGG_PATHWAY	hsa04611:Platelet activation	27	1.03093	0.026715	ENSG00000105499, ENSG00000108821, ENSG00000130635, ENSG00000171560, ENSG00000172575, ENSG00000171564, ENSG00000065534, ENSG00000164171, ENSG00000101333, ENSG00000259207, ENSG00000184009, ENSG00000075624, ENSG00000150093, ENSG00000110799, ENSG00000197943, ENSG00000204262, ENSG00000114353, ENSG00000171557, ENSG00000101608, ENSG00000116473, ENSG00000117020, ENSG00000185386, ENSG00000171608, ENSG0000…	939	130	6879	1.52153	0.99935	0.113121	0.0893284
KEGG_PATHWAY	hsa04722:Neurotrophin signaling pathway	25	0.954563	0.0323669	ENSG00000176697, ENSG00000174775, ENSG00000111252, ENSG00000134259, ENSG00000134070, ENSG00000169047, ENSG00000129946, ENSG00000070831, ENSG00000095015, ENSG00000104312, ENSG00000178363, ENSG00000148053, ENSG00000110851, ENSG00000197943, ENSG00000080815, ENSG00000173039, ENSG00000116473, ENSG00000117020, ENSG00000171606, ENSG00000185386, ENSG00000171608, ENSG00000146232, ENSG00000107263, ENSG0000…	939	120	6879	1.52622	0.999866	0.134945	0.106562
KEGG_PATHWAY	hsa04550:Signaling pathways regulating pluripotency of stem cells	28	1.06911	0.037029	ENSG00000135925, ENSG00000174775, ENSG00000105639, ENSG00000154764, ENSG00000204217, ENSG00000168610, ENSG00000163083, ENSG00000125845, ENSG00000168036, ENSG00000115170, ENSG00000162552, ENSG00000164930, ENSG00000162434, ENSG00000140443, ENSG00000136826, ENSG00000128342, ENSG00000136603, ENSG00000155760, ENSG00000156574, ENSG00000143816, ENSG00000111186, ENSG00000138685, ENSG00000117020, ENSG0000…	939	140	6879	1.46518	0.999964	0.152043	0.120064
KEGG_PATHWAY	hsa05131:Shigellosis	15	0.572738	0.0466516	ENSG00000161638, ENSG00000104312, ENSG00000075624, ENSG00000150093, ENSG00000162704, ENSG00000241553, ENSG00000173039, ENSG00000085733, ENSG00000158195, ENSG00000185386, ENSG00000130429, ENSG00000070831, ENSG00000169429, ENSG00000184009, ENSG00000035403	939	64	6879	1.717	0.999998	0.18592	0.146815
KEGG_PATHWAY	hsa05321:Inflammatory bowel disease (IBD)	15	0.572738	0.0466516	ENSG00000110944, ENSG00000077238, ENSG00000178573, ENSG00000105329, ENSG00000241106, ENSG00000115008, ENSG00000115415, ENSG00000027697, ENSG00000159128, ENSG00000136634, ENSG00000138378, ENSG00000173039, ENSG00000119699, ENSG00000168610, ENSG00000232810	939	64	6879	1.717	0.999998	0.18592	0.146815
KEGG_PATHWAY	hsa04622:RIG-I-like receptor signaling pathway	16	0.61092	0.0474769	ENSG00000185507, ENSG00000131323, ENSG00000095015, ENSG00000187608, ENSG00000263528, ENSG00000168040, ENSG00000173039, ENSG00000115267, ENSG00000003400, ENSG00000137275, ENSG00000083799, ENSG00000185386, ENSG00000232810, ENSG00000102871, ENSG00000169429, ENSG00000107201	939	70	6879	1.67449	0.999998	0.186467	0.147247
KEGG_PATHWAY	hsa05215:Prostate cancer	19	0.725468	0.0482399	ENSG00000135679, ENSG00000197461, ENSG00000146592, ENSG00000174775, ENSG00000173039, ENSG00000110092, ENSG00000150907, ENSG00000081059, ENSG00000167034, ENSG00000117020, ENSG00000168036, ENSG00000171608, ENSG00000145431, ENSG00000100311, ENSG00000107175, ENSG00000017427, ENSG00000163235, ENSG00000124762, ENSG00000140443	939	88	6879	1.58172	0.999998	0.186757	0.147476
KEGG_PATHWAY	hsa00512:Mucin type O-Glycan biosynthesis	9	0.343643	0.0513928	ENSG00000110328, ENSG00000164574, ENSG00000157350, ENSG00000198488, ENSG00000176928, ENSG00000187210, ENSG00000136542, ENSG00000109586, ENSG00000143641	939	31	6879	2.12687	0.999999	0.193838	0.153068
KEGG_PATHWAY	hsa05212:Pancreatic cancer	15	0.572738	0.0523133	ENSG00000106799, ENSG00000128340, ENSG00000105329, ENSG00000115415, ENSG00000171552, ENSG00000173039, ENSG00000119699, ENSG00000110092, ENSG00000147889, ENSG00000168610, ENSG00000117020, ENSG00000171608, ENSG00000070831, ENSG00000163235, ENSG00000162434	939	65	6879	1.69059	1	0.193838	0.153068
KEGG_PATHWAY	hsa05214:Glioma	15	0.572738	0.0523133	ENSG00000135679, ENSG00000197461, ENSG00000178363, ENSG00000174775, ENSG00000197943, ENSG00000110092, ENSG00000147889, ENSG00000117020, ENSG00000171608, ENSG00000129946, ENSG00000100311, ENSG00000017427, ENSG00000163235, ENSG00000124762, ENSG00000140443	939	65	6879	1.69059	1	0.193838	0.153068
KEGG_PATHWAY	hsa00562:Inositol phosphate metabolism	16	0.61092	0.0529299	ENSG00000161714, ENSG00000137825, ENSG00000155252, ENSG00000168918, ENSG00000166908, ENSG00000078269, ENSG00000151689, ENSG00000187091, ENSG00000132376, ENSG00000197943, ENSG00000040933, ENSG00000150867, ENSG00000171608, ENSG00000086544, ENSG00000109452, ENSG00000101333	939	71	6879	1.6509	1	0.193838	0.153068
KEGG_PATHWAY	hsa05134:Legionellosis	13	0.496373	0.0564136	ENSG00000163739, ENSG00000173039, ENSG00000077150, ENSG00000172936, ENSG00000169896, ENSG00000126803, ENSG00000232810, ENSG00000164305, ENSG00000163734, ENSG00000176171, ENSG00000169429, ENSG00000101210, ENSG00000125730	939	54	6879	1.76364	1	0.203841	0.160967
KEGG_PATHWAY	hsa04730:Long-term depression	14	0.534555	0.057669	ENSG00000104695, ENSG00000105499, ENSG00000147571, ENSG00000174775, ENSG00000137713, ENSG00000114353, ENSG00000087258, ENSG00000254087, ENSG00000120063, ENSG00000101333, ENSG00000017427, ENSG00000125675, ENSG00000146535, ENSG00000140443	939	60	6879	1.70937	1	0.205635	0.162384
KEGG_PATHWAY	hsa05220:Chronic myeloid leukemia	16	0.61092	0.0588014	ENSG00000106799, ENSG00000135679, ENSG00000126561, ENSG00000105329, ENSG00000174775, ENSG00000114423, ENSG00000171552, ENSG00000173039, ENSG00000119699, ENSG00000110092, ENSG00000147889, ENSG00000117020, ENSG00000171608, ENSG00000129946, ENSG00000033327, ENSG00000124762	939	72	6879	1.62797	1	0.20695	0.163422
KEGG_PATHWAY	hsa05144:Malaria	12	0.45819	0.0620329	ENSG00000119699, ENSG00000172936, ENSG00000105664, ENSG00000105976, ENSG00000105329, ENSG00000232810, ENSG00000108691, ENSG00000137801, ENSG00000123384, ENSG00000136634, ENSG00000090339, ENSG00000169429	939	49	6879	1.79409	1	0.215525	0.170193
KEGG_PATHWAY	hsa04310:Wnt signaling pathway	26	0.992745	0.0808851	ENSG00000101096, ENSG00000135925, ENSG00000154764, ENSG00000118971, ENSG00000168036, ENSG00000101333, ENSG00000162552, ENSG00000095739, ENSG00000164930, ENSG00000104332, ENSG00000175592, ENSG00000140807, ENSG00000155760, ENSG00000128340, ENSG00000162738, ENSG00000143816, ENSG00000111186, ENSG00000137673, ENSG00000080815, ENSG00000173218, ENSG00000110092, ENSG00000101849, ENSG00000081059, ENSG0000…	939	138	6879	1.38024	1	0.277467	0.219107
KEGG_PATHWAY	hsa05034:Alcoholism	32	1.22184	0.0821312	ENSG00000158406, ENSG00000180596, ENSG00000180573, ENSG00000147571, ENSG00000176697, ENSG00000069535, ENSG00000174775, ENSG00000196747, ENSG00000197903, ENSG00000276966, ENSG00000124635, ENSG00000278828, ENSG00000129946, ENSG00000048052, ENSG00000186469, ENSG00000107175, ENSG00000172380, ENSG00000178363, ENSG00000148053, ENSG00000146592, ENSG00000114353, ENSG00000114450, ENSG00000274750, ENSG0000…	939	177	6879	1.32445	1	0.27822	0.219701
KEGG_PATHWAY	hsa04974:Protein digestion and absorption	18	0.687285	0.0840336	ENSG00000104783, ENSG00000155465, ENSG00000204291, ENSG00000108821, ENSG00000092068, ENSG00000130635, ENSG00000197565, ENSG00000134871, ENSG00000169031, ENSG00000204262, ENSG00000124749, ENSG00000275896, ENSG00000142156, ENSG00000187498, ENSG00000142173, ENSG00000049089, ENSG00000182871, ENSG00000081052	939	88	6879	1.49848	1	0.281149	0.222015
KEGG_PATHWAY	hsa05230:Central carbon metabolism in cancer	14	0.534555	0.0883645	ENSG00000156510, ENSG00000115419, ENSG00000105976, ENSG00000067057, ENSG00000067225, ENSG00000078237, ENSG00000159399, ENSG00000174775, ENSG00000152256, ENSG00000156515, ENSG00000171314, ENSG00000117020, ENSG00000117394, ENSG00000171608	939	64	6879	1.60254	1	0.292034	0.23061
