# Supplementary material for: Modeling fibrotic alveolar transitional cells with pluripotent stem cell-derived alveolar organoids
Source: Life Sci Alliance. 2023 May 25;6(8):e202201853. doi: 10.26508/lsa.202201853 (PMC10213712; doi:10.26508/lsa.202201853)
Supplement: Supplementary file 15 [file LSA-2022-01853_TableS3.xlsx]

## Sheet: CBRa
Component	Final concentration	CAT#	Vendor
L-ascorbic acid	50 μg/ml	A4544	Sigma-Aldrich
1-thioglycerol	0.45 mM	M6145	Sigma-Aldrich
CHIR99021	3 μM	4423	Tocris
Bone morphogenetic protein 4 (BMP4), human recombinant	10 ng/ml	314-BP	R&D Systems
Retinoic acid (RA)	100 nM	695	Tocris
Y-27632	10 μM	688000	Calbiochem
(only when passaging)
