# Supplementary material for: Modeling fibrotic alveolar transitional cells with pluripotent stem cell-derived alveolar organoids
Source: Life Sci Alliance. 2023 May 25;6(8):e202201853. doi: 10.26508/lsa.202201853 (PMC10213712; doi:10.26508/lsa.202201853)
Supplement: Supplementary file 16 [file LSA-2022-01853_TableS4.xlsx]

## Sheet: CK+DCI
Component	Final concentration	CAT#	Vendor
L-ascorbic acid	50 μg/ml	A4544	Sigma-Aldrich
1-thioglycerol	0.45 mM	M6145	Sigma-Aldrich
CHIR99021	3 μM	4423	Tocris
Fibroblast growth factor 7 (FGF7), human recombinant	10 ng/ml	251-KG	R&D Systems
Dexamethasone	50 nM	D4902	Sigma-Aldrich
3-Isobutyl-1-methylxanthine (IBMX)	0.1 mM	I5879	Sigma-Aldrich
8-Bromoadenosine 3′,5′-cyclic monophosphate (cAMP)	0.1 mM	B5386	Sigma-Aldrich
Y-27632	10 μM	688000	Calbiochem
(only when passaging)
Primocin	200 ng/ml	NC9141851	Invivogen
(only during first week after FACS)
