# Supplementary material for: Modeling fibrotic alveolar transitional cells with pluripotent stem cell-derived alveolar organoids
Source: Life Sci Alliance. 2023 May 25;6(8):e202201853. doi: 10.26508/lsa.202201853 (PMC10213712; doi:10.26508/lsa.202201853)
Supplement: Supplementary file 17 [file LSA-2022-01853_TableS5.xlsx]

## Sheet: Antibodies
Target	Species	CAT#	Vendor	Dilution	Application
CD26-PE conj.	Mouse	302705	Biolegend	0.025 µg/	FACS
				5 x 106 cells
CD47-BV421 conj.	Mouse	323115	Biolegend	0.05 µg/	FACS
				5 x 106 cells
IgG2aκ-PE conj. isotype control	Mouse	400211	Biolegend	0.025 µg/	FACS
				5 x 106 cells
IgG1κ-BV421 conj. isotype control	Mouse	562438	BD Biosciences	0.05 µg/	FACS
				5 x 106 cells
NK2 Homeobox 1 (NKX-2.1)	Mouse	ab72876	Abcam	3.2 µg/	Flow cytometry
				2 x 105 cells
Pro-surfactant protein C (SP-C)	Rabbit	AB3786	Merck	1:500	Western blotting
Pro + mature surfactant protein B (SP-B)	Rabbit	ab40876	Abcam	1:1000	Western blotting
β-Actin	Goat	ab8229	Abcam	1:1000	Western blotting
Glyceraldehyde-3-phosphate dehydrogenase (GAPDH)	Mouse	ab9482	Abcam	1:1000	Western blotting
Pro-SP-C	Rabbit	AB3786	Merck	1:500	Immunofluorescence
Pro + mature SP-B	Rabbit	ab40876	Abcam	1:500	Immunofluorescence
E-Cadherin (ECAD)	Mouse	610181	BD Biosciences	1:100	Immunofluorescence
Collagen 1 (COL1)	Rabbit	ab34710	Abcam	1:100	Immunofluorescence
Vimentin (VIM)	Rabbit	5741	Cell Signaling	1:100	Immunofluorescence
Keratin 8 (KRT8)	Mouse	UM500001	Thermo Fisher	1:50	Immunofluorescence
Keratin 17 (KRT17)	Rabbit	HPA000452	Merck	1:100	Immunofluorescence
Keratin 5 (KRT5)	Mouse	MA5-17057	Invitrogen	1:200	Immunofluorescence
