# Supplementary material for: Modeling fibrotic alveolar transitional cells with pluripotent stem cell-derived alveolar organoids
Source: Life Sci Alliance. 2023 May 25;6(8):e202201853. doi: 10.26508/lsa.202201853 (PMC10213712; doi:10.26508/lsa.202201853)
Supplement: Supplementary file 18 [file LSA-2022-01853_TableS6.xlsx]

## Sheet: TaqMan
Target	Assay ID	Vendor
CD47	Hs00179953_m1	Applied Biosystems
CD26	Hs00897386_m1	Applied Biosystems
NKX2-1	Hs00968940_m1	Applied Biosystems
CDH1	Hs01023895_m1	Applied Biosystems
SFTPB	Hs01090667_m1	Applied Biosystems
SFTPC	Hs00161628_m1	Applied Biosystems
KRT8	Hs01595539_g1	Applied Biosystems
KRT17	Hs00356958_m1	Applied Biosystems
FN1	Hs01549976_m1	Applied Biosystems
TNC	Hs01115665_m1	Applied Biosystems
COL1A1	Hs00164004_m1	Applied Biosystems
CDH2	Hs00983056_m1	Applied Biosystems
VIM	Hs00958111_m1	Applied Biosystems
CDKN1A	Hs00355782_m1	Applied Biosystems
CDKN2A	Hs02902543_mH	Applied Biosystems
TGFB1	Hs00998133_m1	Applied Biosystems
IGFBP3	Hs00181211_m1	Applied Biosystems
MMP7	Hs01042796_m1	Applied Biosystems
TBP	Hs00427620_m1	Applied Biosystems
HPRT1	Hs02800695_m1	Applied Biosystems
GAPDH	Hs99999905_m1	Applied Biosystems
18S	Hs99999901_s1	Applied Biosystems
